# Supplementary material for: MiR‐182‐3p targets TRF2 and impairs tumor growth of triple‐negative breast cancer
Source: PubMed Central journal article supplement (PMC9832842; doi:10.15252/emmm.202216033), 2022-11-25
Supplement: EMMM-15-e16033-s010.pdf [file EMMM-15-e16033-s010.pdf]

**Table EV1. High-throughput luciferase miRNAs screening.**

Selected miRNAs targeting the 3'UTR of TRF2 tested in the screening are shown below. In *italics* TRF2 targeting miRNAs already reported in the literature. Two independent experiments were performed.

| miRNAs                | Renilla/Firefly Ratio |              |             | Stand.Dev   |
|-----------------------|-----------------------|--------------|-------------|-------------|
|                       | Experiment 1          | Experiment 2 | Average     |             |
| hsa-miR-182*          | 0,311467542           | 0,44608985   | 0,378778696 | 0,095192347 |
| hsa-miR-519e*         | 0,331903826           | 0,514975042  | 0,423439434 | 0,129450898 |
| hsa-miR-296-3p        | 0,35150408            | 0,709650582  | 0,530577331 | 0,253247821 |
| hsa-miR-508-5p        | 0,564598783           | 0,831281198  | 0,697939991 | 0,188572944 |
| hsa-miR-1207-5p       | 0,669195399           | 0,740099834  | 0,704647616 | 0,050137007 |
| hsa-miR-1             | 0,78289545            | 0,715806988  | 0,749351219 | 0,047438706 |
| hsa-miR-515-5p        | 0,681550061           | 0,835274542  | 0,758412302 | 0,108699623 |
| hsa-miR-363*          | 0,607329194           | 0,957737105  | 0,78253315  | 0,24777581  |
| hsa-miR-206           | 0,723444443           | 0,8718802    | 0,797662321 | 0,10495993  |
| hsa-let-7e            | 0,545741667           | 1,054908486  | 0,800325076 | 0,360035311 |
| <i>hsa-miR-23a</i>    | 0,731804741           | 0,901331115  | 0,816567928 | 0,119873249 |
| hsa-miR-760           | 0,807697667           | 0,945257903  | 0,876477785 | 0,097269776 |
| hsa-miR-596           | 0,742022882           | 1,061397671  | 0,901710276 | 0,225832078 |
| hsa-miR-23b           | 0,791627316           | 1,031447587  | 0,911537452 | 0,16957854  |
| hsa-miR-129-5p        | 1,016798006           | 0,832113145  | 0,924455575 | 0,130591918 |
| hsa-miR-130a*         | 0,855815826           | 1,151081531  | 1,003448678 | 0,208784382 |
| hsa-miR-1909          | 0,693533155           | 1,315973378  | 1,004753266 | 0,440131703 |
| hsa-miR-125b-2*       | 0,69121085            | 1,565557404  | 1,128384127 | 0,618256378 |
| hsa-miR-29b-1*        | 0,917496246           | 1,354575707  | 1,136035976 | 0,309061851 |
| hsa-miR-148a          | 1,057484789           | 1,27437604   | 1,165930414 | 0,153365274 |
| hsa-miR-659           | 0,921862179           | 1,430948419  | 1,176405299 | 0,359978333 |
| hsa-miR-570           | 0,741186853           | 1,655574043  | 1,198380448 | 0,646569383 |
| hsa-miR-1276          | 1,108947067           | 1,353244592  | 1,23109583  | 0,172744437 |
| hsa-miR-663           | 1,184189748           | 1,416306156  | 1,300247952 | 0,164131087 |
| hsa-miR-922           | 1,187626759           | 1,423960067  | 1,305793413 | 0,167112884 |
| hsa-miR-513b          | 1,011967612           | 1,720133111  | 1,366050362 | 0,500748627 |
| hsa-miR-412           | 1,293245189           | 1,513311148  | 1,403278169 | 0,155610132 |
| hsa-miR-373*          | 1,366351349           | 1,464392679  | 1,415372014 | 0,069325689 |
| hsa-miR-148b          | 0,988930346           | 1,91530782   | 1,452119083 | 0,655047794 |
| hsa-miR-369-3p        | 1,597188463           | 1,328618968  | 1,462903716 | 0,189907311 |
| hsa-miR-101           | 0,90625629            | 2,023627288  | 1,464941789 | 0,79010061  |
| <i>hsa-miR-490-3p</i> | 1,317954514           | 1,66156406   | 1,489759287 | 0,24296864  |
| hsa-miR-103-2*        | 1,53114211            | 1,519800333  | 1,525471221 | 0,008019847 |
| hsa-miR-130b          | 1,463702373           | 1,587687188  | 1,525694781 | 0,087670503 |
| hsa-miR-186           | 1,890542026           | 1,22828619   | 1,559414108 | 0,468285593 |
| hsa-miR-130a          | 1,52863402            | 1,591846922  | 1,560240471 | 0,044698271 |
| hsa-miR-338-3p        | 1,974609466           | 1,156239601  | 1,565424533 | 0,578674881 |
| hsa-miR-301a          | 1,628957595           | 1,568219634  | 1,598588614 | 0,042948224 |
| hsa-miR-454           | 1,724172098           | 1,594509151  | 1,659340625 | 0,091685549 |
| hsa-miR-566           | 1,6634206             | 1,684026622  | 1,673723611 | 0,014570658 |
| hsa-miR-301b          | 1,674939233           | 1,807321131  | 1,741130182 | 0,093608138 |
| hsa-miR-409-3p        | 1,427753093           | 2,074875208  | 1,75131415  | 0,457584436 |
| hsa-miR-214           | 1,409174653           | 2,132113145  | 1,770643899 | 0,51119471  |
| hsa-miR-152           | 1,492034494           | 2,11031614   | 1,801175317 | 0,437191144 |
| hsa-miR-1268          | 1,568298989           | 2,102163062  | 1,835231025 | 0,377498906 |
| hsa-miR-497*          | 1,75213265            | 1,973211314  | 1,862671982 | 0,156326223 |
| hsa-miR-616*          | 1,870291527           | 2,110815308  | 1,990553417 | 0,170075997 |
| hsa-miR-96            | 1,815578022           | 2,525124792  | 2,170351407 | 0,501725333 |
| hsa-miR-7-2*          | 2,021891595           | 2,679201331  | 2,350546463 | 0,464788172 |
| hsa-miR-550           | 2,040748711           | 2,828785358  | 2,434767034 | 0,557226057 |
| hsa-miR-664*          | 1,87001285            | 3,033610649  | 2,45181175  | 0,822787894 |
| hsa-miR-126*          | 2,494619993           | 2,565723794  | 2,530171894 | 0,050277979 |
| hsa-miR-7-1*          | 2,195785791           | 3,151580699  | 2,673683245 | 0,675849061 |
| hsa-miR-940           | 1,713117927           | 3,686688852  | 2,699903389 | 1,395525384 |
