# Supplementary material for: MiR‐182‐3p targets TRF2 and impairs tumor growth of triple‐negative breast cancer
Source: PubMed Central journal article supplement (PMC9832842; doi:10.15252/emmm.202216033), 2022-11-25
Supplement: EMMM-15-e16033-s011.pdf [file EMMM-15-e16033-s011.pdf]

**Table EV2. In silico analysis to identify other putative targets of miR-182-3p.**

Analysis of miR-182-3p putative targets was performed by using the online prediction software TargetScan 8.0 (Agarwal *et al*, 2015; McGeary, Lin *et al*, 2019).

| Target gene | Representative transcript | Representative miRNA | Cumulative weighted context++ score | Total context++ score |
|-------------|---------------------------|----------------------|-------------------------------------|-----------------------|
| GIPC3       | ENST00000322315.5         | hsa-miR-182-3p       | -1,68                               | -1,68                 |
| BDKRB2      | ENST00000306005.3         | hsa-miR-182-3p       | -1,28                               | -1,28                 |
| TFRC        | ENST00000540528.1         | hsa-miR-182-3p       | -1,17                               | -1,17                 |
| MRPL13      | ENST00000306185.3         | hsa-miR-182-3p       | -0,74                               | -0,74                 |
| GLIPR2      | ENST00000396613.3         | hsa-miR-182-3p       | -0,73                               | -0,73                 |
| FEZ2        | ENST00000379245.4         | hsa-miR-182-3p       | -0,69                               | -0,7                  |
| EFCAB10     | ENST00000486180.1         | hsa-miR-182-3p       | -0,68                               | -0,82                 |
| ZNF622      | ENST00000308683.2         | hsa-miR-182-3p       | -0,67                               | -0,67                 |
| PPP1R27     | ENST00000570394.1         | hsa-miR-182-3p       | -0,66                               | -0,66                 |
| SMLR1       | ENST00000541421.2         | hsa-miR-182-3p       | -0,65                               | -0,65                 |
| AC020922.1  | ENST00000539076.1         | hsa-miR-182-3p       | -0,63                               | -0,63                 |
| GIN53       | ENST00000318129.5         | hsa-miR-182-3p       | -0,59                               | -0,59                 |
| BNIP1       | ENST00000368931.3         | hsa-miR-182-3p       | -0,58                               | -0,58                 |
| RP11-67H2.1 | ENST00000521500.2         | hsa-miR-182-3p       | -0,58                               | -0,58                 |
| DYNC2L1     | ENST00000260605.8         | hsa-miR-182-3p       | -0,57                               | -0,57                 |
| CLVS1       | ENST00000518592.1         | hsa-miR-182-3p       | -0,56                               | -0,56                 |
| CCDC94      | ENST00000262962.7         | hsa-miR-182-3p       | -0,53                               | -0,53                 |
| VAMP3       | ENST0000054666.6          | hsa-miR-182-3p       | -0,53                               | -0,61                 |
| AL359878.1  | ENST00000381466.1         | hsa-miR-182-3p       | -0,51                               | -0,51                 |
| TRIM44      | ENST00000299413.5         | hsa-miR-182-3p       | -0,5                                | -0,57                 |
| CXXC5       | ENST00000302517.3         | hsa-miR-182-3p       | -0,49                               | -0,49                 |
| H2BFM       | ENST00000355016.3         | hsa-miR-182-3p       | -0,49                               | -0,49                 |
| SLC39A11    | ENST00000255559.3         | hsa-miR-182-3p       | -0,49                               | -0,49                 |
| CYCS        | ENST00000305786.2         | hsa-miR-182-3p       | -0,49                               | -0,5                  |
| SMIM3       | ENST00000526627.1         | hsa-miR-182-3p       | -0,49                               | -0,49                 |
| VSTM1       | ENST00000425006.2         | hsa-miR-182-3p       | -0,48                               | -0,48                 |
| HLA-A       | ENST00000396634.1         | hsa-miR-182-3p       | -0,48                               | -0,69                 |
| OGG1        | ENST00000302008.8         | hsa-miR-182-3p       | -0,48                               | -0,48                 |
| PYROXD1     | ENST00000240651.9         | hsa-miR-182-3p       | -0,48                               | -0,48                 |
| LEPROT      | ENST00000371065.4         | hsa-miR-182-3p       | -0,48                               | -0,56                 |
| CDK8        | ENST00000536792.1         | hsa-miR-182-3p       | -0,47                               | -0,47                 |
| HYAL1       | ENST00000395144.2         | hsa-miR-182-3p       | -0,47                               | -0,47                 |
| C22orf46    | ENST00000402966.1         | hsa-miR-182-3p       | -0,47                               | -0,47                 |
| SLC16A10    | ENST00000368850.3         | hsa-miR-182-3p       | -0,47                               | -0,76                 |
| MTX3        | ENST00000509852.1         | hsa-miR-182-3p       | -0,47                               | -0,48                 |
| HDHD2       | ENST00000300605.6         | hsa-miR-182-3p       | -0,45                               | -0,51                 |
| B4GALT5     | ENST00000371711.4         | hsa-miR-182-3p       | -0,45                               | -0,46                 |
| SYT12       | ENST00000393946.2         | hsa-miR-182-3p       | -0,45                               | -0,45                 |
| ICA1L       | ENST00000392237.2         | hsa-miR-182-3p       | -0,44                               | -0,45                 |
| DIO1        | ENST00000322679.6         | hsa-miR-182-3p       | -0,44                               | -0,44                 |
| C1orf198    | ENST00000366663.5         | hsa-miR-182-3p       | -0,43                               | -0,45                 |
| ISCA1       | ENST00000375991.4         | hsa-miR-182-3p       | -0,43                               | -0,43                 |
| ACYP1       | ENST00000357971.3         | hsa-miR-182-3p       | -0,43                               | -0,43                 |
| HAND1       | ENST00000231121.2         | hsa-miR-182-3p       | -0,43                               | -0,43                 |
| FAM78B      | ENST00000354422.3         | hsa-miR-182-3p       | -0,43                               | -0,43                 |
| SELT        | ENST00000471696.1         | hsa-miR-182-3p       | -0,43                               | -0,43                 |
| YIPF1       | ENST00000371399.1         | hsa-miR-182-3p       | -0,42                               | -0,56                 |
| ZNF135      | ENST00000401053.4         | hsa-miR-182-3p       | -0,42                               | -0,42                 |
| AC016559.1  | ENST00000594347.1         | hsa-miR-182-3p       | -0,42                               | -0,42                 |
| LMO7        | ENST00000341547.4         | hsa-miR-182-3p       | -0,42                               | -0,42                 |
| GNPDA2      | ENST00000509756.1         | hsa-miR-182-3p       | -0,42                               | -0,42                 |
| HHLA1       | ENST00000434736.2         | hsa-miR-182-3p       | -0,42                               | -0,42                 |
| S100G       | ENST00000380200.3         | hsa-miR-182-3p       | -0,41                               | -0,41                 |
| ZPBP2       | ENST00000377940.3         | hsa-miR-182-3p       | -0,41                               | -0,41                 |
| SLC9B2      | ENST00000503103.1         | hsa-miR-182-3p       | -0,41                               | -0,41                 |
| FABP2       | ENST00000274024.3         | hsa-miR-182-3p       | -0,41                               | -0,41                 |
| TEX13A      | ENST00000372578.3         | hsa-miR-182-3p       | -0,41                               | -0,41                 |
| FGF10       | ENST00000264664.4         | hsa-miR-182-3p       | -0,4                                | -0,4                  |

|            |                   |                |       |       |
|------------|-------------------|----------------|-------|-------|
| MATR3      | ENST00000510056.1 | hsa-miR-182-3p | -0,4  | -0,4  |
| KIAA1429   | ENST00000437199.1 | hsa-miR-182-3p | -0,4  | -0,4  |
| SMIM14     | ENST00000295958.5 | hsa-miR-182-3p | -0,4  | -0,4  |
| TMEM207    | ENST00000354905.2 | hsa-miR-182-3p | -0,4  | -0,4  |
| PLCXD3     | ENST00000377801.3 | hsa-miR-182-3p | -0,4  | -0,43 |
| OR9Q1      | ENST00000335397.3 | hsa-miR-182-3p | -0,39 | -0,39 |
| CASP3      | ENST00000393585.2 | hsa-miR-182-3p | -0,39 | -0,39 |
| IL22RA1    | ENST00000270800.1 | hsa-miR-182-3p | -0,39 | -0,39 |
| SLC25A24   | ENST00000565488.1 | hsa-miR-182-3p | -0,39 | -0,39 |
| AC010441.1 | ENST00000600109.1 | hsa-miR-182-3p | -0,39 | -0,39 |
| C8orf17    | ENST00000507535.3 | hsa-miR-182-3p | -0,39 | -0,39 |
| EFNA5      | ENST00000333274.6 | hsa-miR-182-3p | -0,38 | -0,39 |
| NBR1       | ENST00000542611.1 | hsa-miR-182-3p | -0,38 | -0,41 |
| ANKRD29    | ENST00000592179.1 | hsa-miR-182-3p | -0,38 | -0,38 |
| HLA-DQA1   | ENST00000343139.5 | hsa-miR-182-3p | -0,38 | -0,59 |
| CERKL      | ENST00000410087.3 | hsa-miR-182-3p | -0,38 | -0,41 |
| TBPL2      | ENST00000247219.5 | hsa-miR-182-3p | -0,38 | -0,38 |
| SHC4       | ENST00000332408.4 | hsa-miR-182-3p | -0,38 | -0,38 |
| HOXC12     | ENST00000243103.3 | hsa-miR-182-3p | -0,38 | -0,38 |
| GPR37L1    | ENST00000367282.5 | hsa-miR-182-3p | -0,38 | -0,38 |
| AC092811.1 | ENST00000366845.2 | hsa-miR-182-3p | -0,37 | -0,37 |
| ACN9       | ENST00000360382.4 | hsa-miR-182-3p | -0,37 | -0,37 |
| PLEKHS1    | ENST00000354462.3 | hsa-miR-182-3p | -0,37 | -0,38 |
| HNRNPA3    | ENST00000411529.2 | hsa-miR-182-3p | -0,37 | -0,49 |
| CTDSP1     | ENST00000443503.2 | hsa-miR-182-3p | -0,36 | -0,42 |
| C9orf170   | ENST00000375941.2 | hsa-miR-182-3p | -0,36 | -0,36 |
| HTR1F      | ENST00000319595.4 | hsa-miR-182-3p | -0,36 | -0,36 |
| LGI1       | ENST00000371413.3 | hsa-miR-182-3p | -0,36 | -0,36 |
| HPS4       | ENST00000398145.2 | hsa-miR-182-3p | -0,36 | -0,36 |
| SPINK13    | ENST00000512953.1 | hsa-miR-182-3p | -0,36 | -0,36 |
| VASH2      | ENST00000366968.4 | hsa-miR-182-3p | -0,36 | -0,38 |
| GINS4      | ENST00000523277.2 | hsa-miR-182-3p | -0,36 | -0,38 |
| RCAN2      | ENST00000330430.6 | hsa-miR-182-3p | -0,35 | -0,35 |
| LAMTOR1    | ENST00000538404.1 | hsa-miR-182-3p | -0,35 | -0,39 |
| CPA4       | ENST00000445470.2 | hsa-miR-182-3p | -0,35 | -0,35 |
| SYN1       | ENST00000340666.4 | hsa-miR-182-3p | -0,35 | -0,35 |
| LSM14B     | ENST00000253001.4 | hsa-miR-182-3p | -0,35 | -0,46 |
| ZNF441     | ENST00000357901.4 | hsa-miR-182-3p | -0,35 | -0,35 |
| BAAT       | ENST00000259407.2 | hsa-miR-182-3p | -0,35 | -0,35 |
| FAM71E1    | ENST00000600100.1 | hsa-miR-182-3p | -0,35 | -0,35 |
| BOLL       | ENST00000392296.4 | hsa-miR-182-3p | -0,35 | -0,35 |
| VPS13B     | ENST00000395996.1 | hsa-miR-182-3p | -0,35 | -0,35 |
| HECA       | ENST00000367658.2 | hsa-miR-182-3p | -0,35 | -0,35 |
| SRSF10     | ENST00000343255.5 | hsa-miR-182-3p | -0,34 | -0,36 |
| EBNA1BP2   | ENST00000431635.2 | hsa-miR-182-3p | -0,34 | -0,34 |
| HLA-F      | ENST00000259951.7 | hsa-miR-182-3p | -0,34 | -0,34 |
| MORN5      | ENST00000373764.3 | hsa-miR-182-3p | -0,34 | -0,34 |
| GSK3A      | ENST00000222330.3 | hsa-miR-182-3p | -0,34 | -0,34 |
| C10orf11   | ENST00000496424.2 | hsa-miR-182-3p | -0,34 | -0,34 |
| RIC3       | ENST00000396677.2 | hsa-miR-182-3p | -0,34 | -0,34 |
| CCDC78     | ENST00000293889.6 | hsa-miR-182-3p | -0,34 | -0,39 |
| UBE2B      | ENST00000265339.2 | hsa-miR-182-3p | -0,34 | -0,35 |
| TMEM150C   | ENST00000515780.2 | hsa-miR-182-3p | -0,34 | -0,34 |
| GAS8       | ENST00000268699.4 | hsa-miR-182-3p | -0,34 | -0,35 |
| TTC13      | ENST00000366661.4 | hsa-miR-182-3p | -0,34 | -0,35 |
| CCRN4L     | ENST00000280614.2 | hsa-miR-182-3p | -0,34 | -0,57 |
| KRT4       | ENST00000551956.1 | hsa-miR-182-3p | -0,34 | -0,34 |
| ARID5B     | ENST00000279873.7 | hsa-miR-182-3p | -0,34 | -0,34 |
| BCKDHB     | ENST00000545529.1 | hsa-miR-182-3p | -0,34 | -0,34 |
| MYL12B     | ENST00000237500.5 | hsa-miR-182-3p | -0,34 | -0,34 |
| LRRTM2     | ENST00000274711.6 | hsa-miR-182-3p | -0,34 | -0,34 |
| C11orf83   | ENST00000377953.3 | hsa-miR-182-3p | -0,33 | -0,34 |
| CD86       | ENST00000330540.2 | hsa-miR-182-3p | -0,33 | -0,33 |
| UBXN4      | ENST00000272638.9 | hsa-miR-182-3p | -0,33 | -0,34 |
| MUM1L1     | ENST00000357175.2 | hsa-miR-182-3p | -0,33 | -0,33 |
| GABRA2     | ENST00000507460.1 | hsa-miR-182-3p | -0,33 | -0,72 |

|               |                   |                |       |       |
|---------------|-------------------|----------------|-------|-------|
| RPGR          | ENST00000338898.3 | hsa-miR-182-3p | -0,33 | -0,33 |
| CMTM7         | ENST00000334983.5 | hsa-miR-182-3p | -0,33 | -0,33 |
| ZNF677        | ENST00000599012.1 | hsa-miR-182-3p | -0,33 | -0,37 |
| C3orf55       | ENST00000468043.1 | hsa-miR-182-3p | -0,33 | -0,33 |
| PMFBP1        | ENST00000537465.1 | hsa-miR-182-3p | -0,33 | -0,33 |
| IL36G         | ENST00000259205.4 | hsa-miR-182-3p | -0,32 | -0,32 |
| C1orf147      | ENST00000367119.1 | hsa-miR-182-3p | -0,32 | -0,32 |
| FOXN4         | ENST00000355216.1 | hsa-miR-182-3p | -0,32 | -0,32 |
| KLHL13        | ENST00000371882.1 | hsa-miR-182-3p | -0,32 | -0,32 |
| NEUROD4       | ENST00000242994.3 | hsa-miR-182-3p | -0,32 | -0,32 |
| SLC38A1       | ENST00000398637.5 | hsa-miR-182-3p | -0,32 | -0,49 |
| CORO2A        | ENST00000343933.5 | hsa-miR-182-3p | -0,32 | -0,32 |
| GABPA         | ENST00000354828.3 | hsa-miR-182-3p | -0,32 | -0,32 |
| CCNL2         | ENST00000408952.5 | hsa-miR-182-3p | -0,32 | -0,79 |
| CRIM1         | ENST00000280527.2 | hsa-miR-182-3p | -0,32 | -0,32 |
| FANCC         | ENST00000289081.3 | hsa-miR-182-3p | -0,32 | -0,32 |
| UBR7          | ENST00000013070.6 | hsa-miR-182-3p | -0,32 | -0,34 |
| CDK19         | ENST00000368911.3 | hsa-miR-182-3p | -0,32 | -0,34 |
| RNF6          | ENST00000346166.3 | hsa-miR-182-3p | -0,32 | -0,32 |
| UBE2I         | ENST00000355803.4 | hsa-miR-182-3p | -0,32 | -0,32 |
| LYVE1         | ENST00000256178.3 | hsa-miR-182-3p | -0,32 | -0,48 |
| TMEM117       | ENST00000551577.1 | hsa-miR-182-3p | -0,32 | -0,32 |
| ZNF281        | ENST00000294740.3 | hsa-miR-182-3p | -0,31 | -0,35 |
| DPH3          | ENST00000488423.1 | hsa-miR-182-3p | -0,31 | -0,31 |
| PBOV1         | ENST00000527246.2 | hsa-miR-182-3p | -0,31 | -0,31 |
| C18orf63      | ENST00000579455.1 | hsa-miR-182-3p | -0,31 | -0,31 |
| RHOJ          | ENST00000316754.3 | hsa-miR-182-3p | -0,31 | -0,49 |
| SBF1          | ENST00000380817.3 | hsa-miR-182-3p | -0,31 | -0,31 |
| TP53INP2      | ENST00000374810.3 | hsa-miR-182-3p | -0,31 | -0,31 |
| SMYD1         | ENST00000419482.2 | hsa-miR-182-3p | -0,31 | -0,31 |
| FYCO1         | ENST00000296137.2 | hsa-miR-182-3p | -0,31 | -0,33 |
| POLR2L        | ENST00000322028.4 | hsa-miR-182-3p | -0,31 | -0,31 |
| IFI27         | ENST00000444961.1 | hsa-miR-182-3p | -0,31 | -0,31 |
| HIAT1         | ENST00000370152.3 | hsa-miR-182-3p | -0,31 | -0,31 |
| RGS19         | ENST00000395042.1 | hsa-miR-182-3p | -0,31 | -0,31 |
| ACTRT3        | ENST00000330368.2 | hsa-miR-182-3p | -0,31 | -0,36 |
| P2RY11        | ENST00000321826.4 | hsa-miR-182-3p | -0,31 | -0,31 |
| TCEAL5        | ENST00000372680.1 | hsa-miR-182-3p | -0,31 | -0,31 |
| IL27RA        | ENST00000263379.2 | hsa-miR-182-3p | -0,31 | -0,38 |
| GREM1         | ENST00000560677.1 | hsa-miR-182-3p | -0,31 | -0,35 |
| RP11-204N11.1 | ENST00000555187.1 | hsa-miR-182-3p | -0,31 | -0,31 |
| IL6ST         | ENST00000381287.4 | hsa-miR-182-3p | -0,31 | -0,31 |
| RABGAP1L      | ENST00000489615.1 | hsa-miR-182-3p | -0,31 | -0,31 |
| TCTN3         | ENST00000371217.5 | hsa-miR-182-3p | -0,31 | -0,31 |
| FAM98C        | ENST00000588262.1 | hsa-miR-182-3p | -0,31 | -0,32 |
| FGF1          | ENST00000360966.5 | hsa-miR-182-3p | -0,31 | -0,48 |
| DYDC2         | ENST00000372199.1 | hsa-miR-182-3p | -0,3  | -0,3  |
| IGSF23        | ENST00000402988.1 | hsa-miR-182-3p | -0,3  | -0,3  |
| YWHAG         | ENST00000307630.3 | hsa-miR-182-3p | -0,3  | -0,31 |
| POLM          | ENST00000335195.6 | hsa-miR-182-3p | -0,3  | -0,43 |
| TNFSF8        | ENST00000223795.2 | hsa-miR-182-3p | -0,3  | -0,3  |
| OPALIN        | ENST00000371172.3 | hsa-miR-182-3p | -0,3  | -0,3  |
| MDM2          | ENST00000462284.1 | hsa-miR-182-3p | -0,3  | -0,35 |
| PIK3IP1       | ENST00000441972.1 | hsa-miR-182-3p | -0,3  | -0,3  |
| SDF4          | ENST00000263741.7 | hsa-miR-182-3p | -0,3  | -0,3  |
| FBXO45        | ENST00000311630.6 | hsa-miR-182-3p | -0,3  | -0,35 |
| SPIN3         | ENST00000374919.3 | hsa-miR-182-3p | -0,3  | -0,3  |
| ZFP36L2       | ENST00000282388.3 | hsa-miR-182-3p | -0,3  | -0,3  |
| RP11-758M4.1  | ENST00000523118.1 | hsa-miR-182-3p | -0,3  | -0,3  |
| KIAA1143      | ENST00000296121.4 | hsa-miR-182-3p | -0,3  | -0,3  |
| SLC22A6       | ENST00000360421.4 | hsa-miR-182-3p | -0,3  | -0,3  |
| HSD17B11      | ENST00000358290.4 | hsa-miR-182-3p | -0,3  | -0,3  |
| OLIG2         | ENST00000382357.3 | hsa-miR-182-3p | -0,3  | -0,3  |
| EML3          | ENST00000394773.2 | hsa-miR-182-3p | -0,3  | -0,32 |
| COX18         | ENST00000295890.4 | hsa-miR-182-3p | -0,3  | -0,39 |
| ABCC11        | ENST00000353782.5 | hsa-miR-182-3p | -0,29 | -0,29 |

|               |                   |                |       |       |
|---------------|-------------------|----------------|-------|-------|
| PCNXL4        | ENST00000535349.1 | hsa-miR-182-3p | -0,29 | -0,29 |
| ST8SIA1       | ENST00000396037.4 | hsa-miR-182-3p | -0,29 | -0,29 |
| LYSMD2        | ENST00000267838.3 | hsa-miR-182-3p | -0,29 | -0,29 |
| FAF2          | ENST00000261942.6 | hsa-miR-182-3p | -0,29 | -0,36 |
| EHF           | ENST00000257831.3 | hsa-miR-182-3p | -0,29 | -0,29 |
| MED31         | ENST00000225728.3 | hsa-miR-182-3p | -0,29 | -0,36 |
| XYLT2         | ENST00000017003.2 | hsa-miR-182-3p | -0,29 | -0,29 |
| ARL11         | ENST00000282026.1 | hsa-miR-182-3p | -0,29 | -0,29 |
| CSNK2A2       | ENST00000262506.3 | hsa-miR-182-3p | -0,29 | -0,29 |
| RP11-1C1.5    | ENST00000506021.1 | hsa-miR-182-3p | -0,29 | -0,29 |
| LYRM9         | ENST00000460380.2 | hsa-miR-182-3p | -0,29 | -0,31 |
| EMC4          | ENST00000267750.4 | hsa-miR-182-3p | -0,28 | -0,28 |
| RP11-295D22.1 | ENST00000565320.1 | hsa-miR-182-3p | -0,28 | -0,28 |
| SF3B2         | ENST00000528302.1 | hsa-miR-182-3p | -0,28 | -0,28 |
| PSMF1         | ENST00000335877.6 | hsa-miR-182-3p | -0,28 | -0,35 |
| PXMP2         | ENST00000317479.3 | hsa-miR-182-3p | -0,28 | -0,28 |
| SRPX          | ENST00000538295.1 | hsa-miR-182-3p | -0,28 | -0,28 |
| PTTG1IP       | ENST00000397887.3 | hsa-miR-182-3p | -0,28 | -0,3  |
| RAB15         | ENST00000436278.2 | hsa-miR-182-3p | -0,28 | -0,36 |
| CDKL3         | ENST00000521755.1 | hsa-miR-182-3p | -0,28 | -0,28 |
| CYP3A7        | ENST00000336374.2 | hsa-miR-182-3p | -0,28 | -0,28 |
| KCNE3         | ENST00000310128.4 | hsa-miR-182-3p | -0,28 | -0,28 |
| EDA           | ENST00000374553.2 | hsa-miR-182-3p | -0,28 | -0,28 |
| PPAN          | ENST00000556468.1 | hsa-miR-182-3p | -0,28 | -0,28 |
| C4orf6        | ENST00000195455.2 | hsa-miR-182-3p | -0,28 | -0,28 |
| PDE9A         | ENST00000335512.4 | hsa-miR-182-3p | -0,28 | -0,34 |
| MRPL14        | ENST00000372014.3 | hsa-miR-182-3p | -0,28 | -0,28 |
| CDKL5         | ENST00000379996.3 | hsa-miR-182-3p | -0,28 | -0,28 |
| VPS52         | ENST00000482399.1 | hsa-miR-182-3p | -0,28 | -0,28 |
| GATM          | ENST00000396659.3 | hsa-miR-182-3p | -0,28 | -0,28 |
| CYBB          | ENST00000378588.4 | hsa-miR-182-3p | -0,28 | -0,28 |
| CFL2          | ENST00000341223.3 | hsa-miR-182-3p | -0,28 | -0,28 |
| SMIM12        | ENST00000521580.2 | hsa-miR-182-3p | -0,28 | -0,72 |
| SLC30A4       | ENST00000261867.4 | hsa-miR-182-3p | -0,28 | -0,28 |
| MYADM         | ENST00000391770.4 | hsa-miR-182-3p | -0,27 | -0,28 |
| SNX16         | ENST00000353788.4 | hsa-miR-182-3p | -0,27 | -0,27 |
| ADGB          | ENST00000367493.3 | hsa-miR-182-3p | -0,27 | -0,27 |
| NPPA          | ENST00000376480.3 | hsa-miR-182-3p | -0,27 | -0,27 |
| SPATA5        | ENST00000274008.4 | hsa-miR-182-3p | -0,27 | -0,34 |
| POTEC         | ENST00000358970.5 | hsa-miR-182-3p | -0,27 | -0,27 |
| ZNF250        | ENST00000292579.7 | hsa-miR-182-3p | -0,27 | -0,31 |
| GEMIN6        | ENST00000409011.1 | hsa-miR-182-3p | -0,27 | -0,27 |
| GPR128        | ENST00000273352.3 | hsa-miR-182-3p | -0,27 | -0,27 |
| AL590483.1    | ENST00000598000.1 | hsa-miR-182-3p | -0,27 | -0,27 |
| C2orf91       | ENST00000378711.2 | hsa-miR-182-3p | -0,27 | -0,27 |
| CTB-186H2.3   | ENST00000591669.1 | hsa-miR-182-3p | -0,27 | -0,27 |
| OLFM4         | ENST00000219022.2 | hsa-miR-182-3p | -0,27 | -0,27 |
| ADH7          | ENST00000437033.2 | hsa-miR-182-3p | -0,27 | -0,27 |
| C14orf119     | ENST00000319074.4 | hsa-miR-182-3p | -0,27 | -0,27 |
| FIG4          | ENST00000230124.3 | hsa-miR-182-3p | -0,27 | -0,27 |
| MMP2          | ENST00000219070.4 | hsa-miR-182-3p | -0,27 | -0,32 |
| COX11         | ENST00000571584.1 | hsa-miR-182-3p | -0,26 | -0,27 |
| RHOV          | ENST00000220507.4 | hsa-miR-182-3p | -0,26 | -0,26 |
| GCM2          | ENST00000379491.4 | hsa-miR-182-3p | -0,26 | -0,26 |
| GADD45A       | ENST00000370986.4 | hsa-miR-182-3p | -0,26 | -0,27 |
| SNTB2         | ENST00000336278.4 | hsa-miR-182-3p | -0,26 | -0,34 |
| CTD-2162K18.4 | ENST00000590750.1 | hsa-miR-182-3p | -0,26 | -0,26 |
| MEI4          | ENST00000602452.2 | hsa-miR-182-3p | -0,26 | -0,26 |
| CNTNAP2       | ENST00000361727.3 | hsa-miR-182-3p | -0,26 | -0,28 |
| C15orf40      | ENST00000304177.5 | hsa-miR-182-3p | -0,26 | -0,26 |
| FAM221B       | ENST00000423537.2 | hsa-miR-182-3p | -0,26 | -0,26 |
| FAXC          | ENST00000389677.5 | hsa-miR-182-3p | -0,26 | -0,45 |
| C6            | ENST00000337836.5 | hsa-miR-182-3p | -0,26 | -0,32 |
| PTPRD         | ENST00000381196.4 | hsa-miR-182-3p | -0,26 | -0,31 |
| SALL4         | ENST00000217086.4 | hsa-miR-182-3p | -0,26 | -0,27 |
| TMEM154       | ENST00000304385.3 | hsa-miR-182-3p | -0,26 | -0,26 |

|               |                   |                |       |       |
|---------------|-------------------|----------------|-------|-------|
| SERINC4       | ENST00000299969.6 | hsa-miR-182-3p | -0,26 | -0,26 |
| METTL4        | ENST00000319888.6 | hsa-miR-182-3p | -0,26 | -0,29 |
| MMP8          | ENST00000236826.3 | hsa-miR-182-3p | -0,26 | -0,26 |
| CNIH4         | ENST00000465271.1 | hsa-miR-182-3p | -0,26 | -0,26 |
| ZNF667        | ENST00000591790.1 | hsa-miR-182-3p | -0,26 | -0,26 |
| PIGL          | ENST00000225609.5 | hsa-miR-182-3p | -0,26 | -0,3  |
| CBFB          | ENST00000290858.6 | hsa-miR-182-3p | -0,26 | -0,27 |
| SLC7A8        | ENST00000469263.1 | hsa-miR-182-3p | -0,26 | -0,32 |
| PABPC4L       | ENST00000421491.3 | hsa-miR-182-3p | -0,26 | -0,26 |
| RNF141        | ENST00000265981.2 | hsa-miR-182-3p | -0,26 | -0,29 |
| TAF11         | ENST00000420584.2 | hsa-miR-182-3p | -0,26 | -0,48 |
| KCNJ10        | ENST00000368089.3 | hsa-miR-182-3p | -0,26 | -0,26 |
| HSD17B6       | ENST00000554643.1 | hsa-miR-182-3p | -0,26 | -0,26 |
| DUSP6         | ENST00000279488.7 | hsa-miR-182-3p | -0,26 | -0,26 |
| RGS22         | ENST00000360863.6 | hsa-miR-182-3p | -0,26 | -0,26 |
| TNNI3K        | ENST00000370891.2 | hsa-miR-182-3p | -0,26 | -0,26 |
| FPGT-TNNI3K   | ENST00000557284.2 | hsa-miR-182-3p | -0,26 | -0,26 |
| CDCP2         | ENST00000371330.1 | hsa-miR-182-3p | -0,26 | -0,26 |
| TOR1B         | ENST00000259339.2 | hsa-miR-182-3p | -0,25 | -0,32 |
| RP11-650K20.3 | ENST00000551650.1 | hsa-miR-182-3p | -0,25 | -0,25 |
| ANGPT2        | ENST00000325203.5 | hsa-miR-182-3p | -0,25 | -0,25 |
| C10orf111     | ENST00000378207.3 | hsa-miR-182-3p | -0,25 | -0,25 |
| SH3BGR        | ENST00000380637.3 | hsa-miR-182-3p | -0,25 | -0,25 |
| NRAS          | ENST00000369535.4 | hsa-miR-182-3p | -0,25 | -0,37 |
| CASC1         | ENST00000354189.5 | hsa-miR-182-3p | -0,25 | -0,25 |
| ZNF800        | ENST00000393313.1 | hsa-miR-182-3p | -0,25 | -0,25 |
| CALCOCO2      | ENST00000258947.3 | hsa-miR-182-3p | -0,25 | -0,25 |
| DOK1          | ENST00000340004.6 | hsa-miR-182-3p | -0,25 | -0,4  |
| C1orf68       | ENST00000368775.2 | hsa-miR-182-3p | -0,25 | -0,25 |
| CDH11         | ENST00000394156.3 | hsa-miR-182-3p | -0,25 | -0,25 |
| PTDSS2        | ENST00000308020.5 | hsa-miR-182-3p | -0,25 | -0,25 |
| SERPINB7      | ENST00000398019.2 | hsa-miR-182-3p | -0,25 | -0,25 |
| CXCR2         | ENST00000318507.2 | hsa-miR-182-3p | -0,25 | -0,25 |
| PMP2          | ENST00000256103.2 | hsa-miR-182-3p | -0,25 | -0,25 |
| MFAP3         | ENST00000436816.1 | hsa-miR-182-3p | -0,25 | -0,27 |
| NUP153        | ENST00000262077.2 | hsa-miR-182-3p | -0,25 | -0,26 |
| MRPS17        | ENST00000426595.1 | hsa-miR-182-3p | -0,25 | -0,29 |
| AC106017.1    | ENST00000436914.1 | hsa-miR-182-3p | -0,25 | -0,39 |
| FAM216B       | ENST00000537894.1 | hsa-miR-182-3p | -0,25 | -0,36 |
| WWP1          | ENST00000517970.1 | hsa-miR-182-3p | -0,25 | -0,25 |
| AMMECR1       | ENST00000262844.5 | hsa-miR-182-3p | -0,25 | -0,25 |
| DLEU7         | ENST00000504404.1 | hsa-miR-182-3p | -0,25 | -0,25 |
| ZWILCH        | ENST00000307897.5 | hsa-miR-182-3p | -0,25 | -0,25 |
| LUZP2         | ENST00000533227.1 | hsa-miR-182-3p | -0,25 | -0,25 |
| SRSF1         | ENST00000258962.4 | hsa-miR-182-3p | -0,25 | -0,25 |
| CCDC152       | ENST00000361970.5 | hsa-miR-182-3p | -0,25 | -0,25 |
| LRRD1         | ENST00000343318.5 | hsa-miR-182-3p | -0,25 | -0,38 |
| DUSP10        | ENST00000366899.3 | hsa-miR-182-3p | -0,25 | -0,25 |
| LEMD1         | ENST00000367154.1 | hsa-miR-182-3p | -0,25 | -0,25 |
| ALDH1A2       | ENST00000249750.4 | hsa-miR-182-3p | -0,25 | -0,25 |
| CNTD1         | ENST00000588408.1 | hsa-miR-182-3p | -0,25 | -0,25 |
| TMEM155       | ENST00000394396.1 | hsa-miR-182-3p | -0,25 | -0,25 |
| SDC4          | ENST00000372733.3 | hsa-miR-182-3p | -0,25 | -0,25 |
| TUB           | ENST00000305253.4 | hsa-miR-182-3p | -0,25 | -0,25 |
| DUSP16        | ENST00000298573.4 | hsa-miR-182-3p | -0,25 | -0,25 |
| KRT5          | ENST00000252242.4 | hsa-miR-182-3p | -0,25 | -0,25 |
| GPRIN3        | ENST00000609438.1 | hsa-miR-182-3p | -0,25 | -0,25 |
| CCNG1         | ENST00000340828.2 | hsa-miR-182-3p | -0,25 | -0,25 |
| MLKL          | ENST00000306247.7 | hsa-miR-182-3p | -0,24 | -0,24 |
| LRRC18        | ENST00000374160.3 | hsa-miR-182-3p | -0,24 | -0,24 |
| DNAJC5        | ENST00000360864.4 | hsa-miR-182-3p | -0,24 | -0,39 |
| C5orf42       | ENST00000508244.1 | hsa-miR-182-3p | -0,24 | -0,46 |
| GEMIN7        | ENST00000270257.4 | hsa-miR-182-3p | -0,24 | -0,27 |
| DCTN5         | ENST00000300087.2 | hsa-miR-182-3p | -0,24 | -0,26 |
| FAM122C       | ENST00000370785.3 | hsa-miR-182-3p | -0,24 | -0,24 |
| KRTAP5-10     | ENST00000398531.1 | hsa-miR-182-3p | -0,24 | -0,24 |

|            |                   |                |       |       |
|------------|-------------------|----------------|-------|-------|
| LHFPL3     | ENST00000535008.1 | hsa-miR-182-3p | -0,24 | -0,24 |
| ZBTB9      | ENST00000395064.2 | hsa-miR-182-3p | -0,24 | -0,24 |
| LLGL1      | ENST00000316843.4 | hsa-miR-182-3p | -0,24 | -0,24 |
| MLIP       | ENST00000274897.5 | hsa-miR-182-3p | -0,24 | -0,24 |
| ZNF599     | ENST00000587354.2 | hsa-miR-182-3p | -0,24 | -0,24 |
| SEPT11     | ENST00000264893.6 | hsa-miR-182-3p | -0,24 | -0,25 |
| CYP3A5     | ENST00000339843.2 | hsa-miR-182-3p | -0,24 | -0,24 |
| FAM91A1    | ENST00000334705.7 | hsa-miR-182-3p | -0,24 | -0,24 |
| LSM12      | ENST00000585388.1 | hsa-miR-182-3p | -0,24 | -0,38 |
| HAVCR1     | ENST00000523175.1 | hsa-miR-182-3p | -0,24 | -0,26 |
| ZNF185     | ENST00000535861.1 | hsa-miR-182-3p | -0,24 | -0,24 |
| AARS       | ENST00000261772.8 | hsa-miR-182-3p | -0,24 | -0,24 |
| CC2D2A     | ENST00000511544.1 | hsa-miR-182-3p | -0,24 | -0,24 |
| LRRC15     | ENST00000347624.3 | hsa-miR-182-3p | -0,24 | -0,24 |
| VHLL       | ENST00000339922.3 | hsa-miR-182-3p | -0,24 | -0,34 |
| PTGES3L    | ENST00000453594.1 | hsa-miR-182-3p | -0,24 | -0,3  |
| SAMD5      | ENST00000367474.1 | hsa-miR-182-3p | -0,24 | -0,24 |
| AMIGO1     | ENST00000369864.4 | hsa-miR-182-3p | -0,24 | -0,24 |
| GPR31      | ENST00000366834.1 | hsa-miR-182-3p | -0,24 | -0,24 |
| FAT1       | ENST00000441802.2 | hsa-miR-182-3p | -0,24 | -0,3  |
| PAK4       | ENST00000599386.1 | hsa-miR-182-3p | -0,24 | -0,24 |
| TMCC1      | ENST00000432054.2 | hsa-miR-182-3p | -0,24 | -0,34 |
| PHACTR2    | ENST00000427704.2 | hsa-miR-182-3p | -0,24 | -0,28 |
| RTP4       | ENST00000259030.2 | hsa-miR-182-3p | -0,24 | -0,24 |
| TNC        | ENST00000340094.3 | hsa-miR-182-3p | -0,24 | -0,24 |
| DPF3       | ENST00000541685.1 | hsa-miR-182-3p | -0,24 | -0,24 |
| C8orf37    | ENST00000286688.5 | hsa-miR-182-3p | -0,24 | -0,33 |
| TIFA       | ENST00000361717.3 | hsa-miR-182-3p | -0,24 | -0,34 |
| TAGLN      | ENST00000532870.1 | hsa-miR-182-3p | -0,24 | -0,24 |
| SLCO1A2    | ENST00000307378.6 | hsa-miR-182-3p | -0,23 | -0,23 |
| C20orf27   | ENST00000217195.8 | hsa-miR-182-3p | -0,23 | -0,23 |
| SNX22      | ENST00000325881.4 | hsa-miR-182-3p | -0,23 | -0,23 |
| NDRG3      | ENST00000373803.2 | hsa-miR-182-3p | -0,23 | -0,24 |
| ADIPOR2    | ENST00000357103.4 | hsa-miR-182-3p | -0,23 | -0,27 |
| ZSCAN29    | ENST00000562072.1 | hsa-miR-182-3p | -0,23 | -0,26 |
| RTCB       | ENST00000451746.2 | hsa-miR-182-3p | -0,23 | -0,4  |
| C8orf86    | ENST00000358138.1 | hsa-miR-182-3p | -0,23 | -0,23 |
| AP3S2      | ENST00000336418.4 | hsa-miR-182-3p | -0,23 | -0,24 |
| GJA9       | ENST00000454994.2 | hsa-miR-182-3p | -0,23 | -0,26 |
| ZNF684     | ENST00000372699.3 | hsa-miR-182-3p | -0,23 | -0,23 |
| COA6       | ENST00000366615.4 | hsa-miR-182-3p | -0,23 | -0,27 |
| SEC24D     | ENST00000429811.2 | hsa-miR-182-3p | -0,23 | -0,23 |
| SEMA3D     | ENST00000284136.6 | hsa-miR-182-3p | -0,23 | -0,24 |
| TMEM26     | ENST00000399298.3 | hsa-miR-182-3p | -0,23 | -0,39 |
| PARM1      | ENST00000513238.1 | hsa-miR-182-3p | -0,23 | -0,28 |
| SPATA20    | ENST00000006658.6 | hsa-miR-182-3p | -0,23 | -0,23 |
| PTMA       | ENST00000409115.3 | hsa-miR-182-3p | -0,23 | -0,23 |
| UBE3D      | ENST00000369747.3 | hsa-miR-182-3p | -0,23 | -0,23 |
| C9orf47    | ENST00000375851.2 | hsa-miR-182-3p | -0,23 | -0,23 |
| AC093677.1 | ENST00000600169.1 | hsa-miR-182-3p | -0,23 | -0,23 |
| HDAC8      | ENST00000439122.2 | hsa-miR-182-3p | -0,23 | -0,23 |
| DRAXIN     | ENST00000294485.5 | hsa-miR-182-3p | -0,23 | -0,23 |
| MTRF1L     | ENST00000367231.5 | hsa-miR-182-3p | -0,23 | -0,23 |
| KBTBD7     | ENST00000379483.3 | hsa-miR-182-3p | -0,23 | -0,36 |
| DDI2       | ENST00000480945.1 | hsa-miR-182-3p | -0,23 | -0,23 |
| KRTAP5-11  | ENST00000398530.1 | hsa-miR-182-3p | -0,23 | -0,23 |
| PLAC9      | ENST00000372263.3 | hsa-miR-182-3p | -0,23 | -0,23 |
| LGSN       | ENST00000370658.5 | hsa-miR-182-3p | -0,23 | -0,23 |
| PIAS2      | ENST00000585916.1 | hsa-miR-182-3p | -0,23 | -0,23 |
| FRMD6      | ENST00000395718.2 | hsa-miR-182-3p | -0,23 | -0,24 |
| SLC22A5    | ENST00000245407.3 | hsa-miR-182-3p | -0,23 | -0,23 |
| FCGR3B     | ENST00000367964.2 | hsa-miR-182-3p | -0,23 | -0,23 |
| HLA-DQB2   | ENST00000435145.2 | hsa-miR-182-3p | -0,23 | -0,23 |
| RAB6C      | ENST00000410061.2 | hsa-miR-182-3p | -0,23 | -0,23 |
| CARD8      | ENST00000520753.1 | hsa-miR-182-3p | -0,23 | -0,24 |
| RBL1       | ENST00000598590.1 | hsa-miR-182-3p | -0,23 | -0,23 |

|            |                   |                |       |       |
|------------|-------------------|----------------|-------|-------|
| AVIL       | ENST00000537081.1 | hsa-miR-182-3p | -0,23 | -0,23 |
| GIF        | ENST00000257248.2 | hsa-miR-182-3p | -0,23 | -0,23 |
| TCHP       | ENST00000405876.4 | hsa-miR-182-3p | -0,23 | -0,24 |
| SNX31      | ENST00000311812.2 | hsa-miR-182-3p | -0,23 | -0,23 |
| TMEM176A   | ENST00000004103.3 | hsa-miR-182-3p | -0,23 | -0,23 |
| CCDC27     | ENST00000294600.2 | hsa-miR-182-3p | -0,23 | -0,23 |
| VWC2L      | ENST00000427124.1 | hsa-miR-182-3p | -0,23 | -0,23 |
| H2AFX      | ENST00000530167.1 | hsa-miR-182-3p | -0,22 | -0,23 |
| HS2ST1     | ENST00000370550.5 | hsa-miR-182-3p | -0,22 | -0,26 |
| KRTAP5-2   | ENST00000412090.1 | hsa-miR-182-3p | -0,22 | -0,22 |
| CLINT1     | ENST00000523094.1 | hsa-miR-182-3p | -0,22 | -0,22 |
| AJUBA      | ENST00000262713.2 | hsa-miR-182-3p | -0,22 | -0,22 |
| HMGXB4     | ENST00000216106.5 | hsa-miR-182-3p | -0,22 | -0,23 |
| LPCAT2     | ENST00000262134.5 | hsa-miR-182-3p | -0,22 | -0,23 |
| ACTR3C     | ENST00000252071.4 | hsa-miR-182-3p | -0,22 | -0,22 |
| FAM222B    | ENST00000582266.1 | hsa-miR-182-3p | -0,22 | -0,23 |
| SLIT2      | ENST00000504154.1 | hsa-miR-182-3p | -0,22 | -0,32 |
| NTSR2      | ENST00000306928.5 | hsa-miR-182-3p | -0,22 | -0,22 |
| AL033381.1 | ENST00000314040.1 | hsa-miR-182-3p | -0,22 | -0,22 |
| FCGR3A     | ENST00000367969.3 | hsa-miR-182-3p | -0,22 | -0,22 |
| IMPG1      | ENST00000369963.3 | hsa-miR-182-3p | -0,22 | -0,22 |
| ZNF233     | ENST00000592581.1 | hsa-miR-182-3p | -0,22 | -0,23 |
| CABP1      | ENST00000453000.1 | hsa-miR-182-3p | -0,22 | -0,22 |
| ANGPTL7    | ENST00000376819.3 | hsa-miR-182-3p | -0,22 | -0,22 |
| GMEB2      | ENST00000370069.1 | hsa-miR-182-3p | -0,22 | -0,22 |
| FLI1       | ENST00000527786.2 | hsa-miR-182-3p | -0,22 | -0,35 |
| DHODH      | ENST00000219240.4 | hsa-miR-182-3p | -0,22 | -0,22 |
| BMP6       | ENST00000283147.6 | hsa-miR-182-3p | -0,22 | -0,22 |
| IP6K1      | ENST00000468463.1 | hsa-miR-182-3p | -0,22 | -0,27 |
| C11orf87   | ENST00000327419.6 | hsa-miR-182-3p | -0,22 | -0,22 |
| CHRNA9     | ENST00000310169.2 | hsa-miR-182-3p | -0,22 | -0,22 |
| EPS8L3     | ENST00000361852.4 | hsa-miR-182-3p | -0,22 | -0,22 |
| SPDL1      | ENST00000265295.4 | hsa-miR-182-3p | -0,22 | -0,22 |
| VAPB       | ENST00000395802.3 | hsa-miR-182-3p | -0,22 | -0,25 |
| DDHD1      | ENST00000323669.5 | hsa-miR-182-3p | -0,22 | -0,36 |
| EMP2       | ENST00000359543.3 | hsa-miR-182-3p | -0,22 | -0,22 |
| UBL3       | ENST00000380680.4 | hsa-miR-182-3p | -0,22 | -0,22 |
| MTCP1      | ENST00000369476.3 | hsa-miR-182-3p | -0,22 | -0,22 |
| CCT3       | ENST00000295688.3 | hsa-miR-182-3p | -0,22 | -0,22 |
| BIRC6      | ENST00000421745.2 | hsa-miR-182-3p | -0,22 | -0,22 |
| CYP27B1    | ENST00000228606.4 | hsa-miR-182-3p | -0,22 | -0,29 |
| HFM1       | ENST00000294696.5 | hsa-miR-182-3p | -0,22 | -0,22 |
| MTMR2      | ENST00000346299.5 | hsa-miR-182-3p | -0,22 | -0,22 |
| MSANTD3    | ENST00000395067.2 | hsa-miR-182-3p | -0,22 | -0,34 |
| APOL4      | ENST00000404685.3 | hsa-miR-182-3p | -0,22 | -0,22 |
| TTLL9      | ENST00000375921.2 | hsa-miR-182-3p | -0,22 | -0,22 |
| RHOU       | ENST00000366691.3 | hsa-miR-182-3p | -0,22 | -0,22 |
| XG         | ENST00000426774.1 | hsa-miR-182-3p | -0,22 | -0,22 |
| SLC25A6    | ENST00000381401.5 | hsa-miR-182-3p | -0,22 | -0,22 |
| KRT84      | ENST00000257951.3 | hsa-miR-182-3p | -0,22 | -0,22 |
| OR13G1     | ENST00000359688.2 | hsa-miR-182-3p | -0,22 | -0,22 |
| CDKN2A     | ENST00000498124.1 | hsa-miR-182-3p | -0,21 | -0,38 |
| RBMS3      | ENST00000396583.3 | hsa-miR-182-3p | -0,21 | -0,44 |
| ISCU       | ENST00000338291.4 | hsa-miR-182-3p | -0,21 | -0,67 |
| DUSP26     | ENST00000256261.4 | hsa-miR-182-3p | -0,21 | -0,21 |
| AC008267.1 | ENST00000600021.1 | hsa-miR-182-3p | -0,21 | -0,21 |
| LINGO4     | ENST00000368820.3 | hsa-miR-182-3p | -0,21 | -0,21 |
| C9orf152   | ENST00000400613.4 | hsa-miR-182-3p | -0,21 | -0,21 |
| WDR1       | ENST00000499869.2 | hsa-miR-182-3p | -0,21 | -0,23 |
| TMEM164    | ENST00000372073.1 | hsa-miR-182-3p | -0,21 | -0,24 |
| LDLRAP1    | ENST00000374338.4 | hsa-miR-182-3p | -0,21 | -0,21 |
| NKAIN3     | ENST00000523211.1 | hsa-miR-182-3p | -0,21 | -0,21 |
| DOK2       | ENST00000276420.4 | hsa-miR-182-3p | -0,21 | -0,21 |
| SLC9C2     | ENST00000367714.3 | hsa-miR-182-3p | -0,21 | -0,21 |
| SLC4A5     | ENST00000423644.1 | hsa-miR-182-3p | -0,21 | -0,21 |
| SNX10      | ENST00000396376.1 | hsa-miR-182-3p | -0,21 | -0,21 |

|             |                   |                |       |       |
|-------------|-------------------|----------------|-------|-------|
| C12orf42    | ENST00000548883.1 | hsa-miR-182-3p | -0,21 | -0,21 |
| FAM206A     | ENST00000322940.6 | hsa-miR-182-3p | -0,21 | -0,21 |
| TRIM10      | ENST00000449742.2 | hsa-miR-182-3p | -0,21 | -0,21 |
| RBM3        | ENST00000354480.2 | hsa-miR-182-3p | -0,21 | -0,25 |
| PSMG4       | ENST00000473000.2 | hsa-miR-182-3p | -0,21 | -0,21 |
| FAM49A      | ENST00000381323.3 | hsa-miR-182-3p | -0,21 | -0,29 |
| MAP3K5      | ENST00000359015.4 | hsa-miR-182-3p | -0,21 | -0,21 |
| TFIP11      | ENST00000407690.1 | hsa-miR-182-3p | -0,21 | -0,21 |
| RASL12      | ENST00000220062.4 | hsa-miR-182-3p | -0,21 | -0,21 |
| HIST1H4I    | ENST00000354348.2 | hsa-miR-182-3p | -0,21 | -0,21 |
| USP18       | ENST00000215794.7 | hsa-miR-182-3p | -0,21 | -0,21 |
| RAB6A       | ENST00000310653.6 | hsa-miR-182-3p | -0,21 | -0,21 |
| AC022498.1  | ENST00000392468.2 | hsa-miR-182-3p | -0,21 | -0,21 |
| SLC2A12     | ENST00000275230.5 | hsa-miR-182-3p | -0,21 | -0,26 |
| ADAT2       | ENST00000606514.1 | hsa-miR-182-3p | -0,21 | -0,21 |
| CD8A        | ENST00000456996.2 | hsa-miR-182-3p | -0,21 | -0,21 |
| CA3         | ENST00000285381.2 | hsa-miR-182-3p | -0,21 | -0,21 |
| ELK3        | ENST00000228741.3 | hsa-miR-182-3p | -0,21 | -0,21 |
| PIN1        | ENST00000247970.4 | hsa-miR-182-3p | -0,21 | -0,33 |
| TBC1D31     | ENST00000378080.2 | hsa-miR-182-3p | -0,21 | -0,21 |
| C5orf45     | ENST00000518219.1 | hsa-miR-182-3p | -0,21 | -0,21 |
| ZNF786      | ENST00000316286.9 | hsa-miR-182-3p | -0,21 | -0,21 |
| DUSP1       | ENST00000239223.3 | hsa-miR-182-3p | -0,21 | -0,21 |
| STXBP4      | ENST00000376352.2 | hsa-miR-182-3p | -0,21 | -0,31 |
| CYP1A1      | ENST00000379727.3 | hsa-miR-182-3p | -0,21 | -0,21 |
| PPAN-P2RY11 | ENST00000428358.1 | hsa-miR-182-3p | -0,21 | -0,21 |
| MOB1B       | ENST00000309395.2 | hsa-miR-182-3p | -0,21 | -0,21 |
| ROM1        | ENST00000534093.1 | hsa-miR-182-3p | -0,21 | -0,21 |
| CELF2       | ENST00000379261.4 | hsa-miR-182-3p | -0,21 | -0,21 |
| PRELID2     | ENST00000334744.4 | hsa-miR-182-3p | -0,21 | -0,21 |
| PACSIN2     | ENST00000263246.3 | hsa-miR-182-3p | -0,21 | -0,22 |
| PEX12       | ENST00000225873.4 | hsa-miR-182-3p | -0,21 | -0,21 |
| CYP3A4      | ENST00000354593.2 | hsa-miR-182-3p | -0,21 | -0,21 |
| OVCA2       | ENST00000572195.1 | hsa-miR-182-3p | -0,21 | -0,21 |
| POLR2K      | ENST00000353107.3 | hsa-miR-182-3p | -0,21 | -0,21 |
| RAB27A      | ENST00000396307.2 | hsa-miR-182-3p | -0,21 | -0,21 |
| SPACA7      | ENST00000283550.3 | hsa-miR-182-3p | -0,2  | -0,2  |
| BCL2L1      | ENST00000376062.2 | hsa-miR-182-3p | -0,2  | -0,2  |
| CHST14      | ENST00000306243.5 | hsa-miR-182-3p | -0,2  | -0,2  |
| CTNND1      | ENST00000524630.1 | hsa-miR-182-3p | -0,2  | -0,2  |
| TRPC5       | ENST00000262839.2 | hsa-miR-182-3p | -0,2  | -0,2  |
| KCNQ3       | ENST00000388996.4 | hsa-miR-182-3p | -0,2  | -0,2  |
| ZFP69B      | ENST00000484445.1 | hsa-miR-182-3p | -0,2  | -0,2  |
| SMIM8       | ENST00000392863.1 | hsa-miR-182-3p | -0,2  | -0,39 |
| MAP6D1      | ENST00000318631.3 | hsa-miR-182-3p | -0,2  | -0,2  |
| IYD         | ENST00000344419.3 | hsa-miR-182-3p | -0,2  | -0,2  |
| TRIQQ       | ENST00000521988.1 | hsa-miR-182-3p | -0,2  | -0,27 |
| C1orf131    | ENST00000318906.2 | hsa-miR-182-3p | -0,2  | -0,2  |
| TCERG1      | ENST00000296702.5 | hsa-miR-182-3p | -0,2  | -0,22 |
| OLFML2A     | ENST00000288815.5 | hsa-miR-182-3p | -0,2  | -0,2  |
| LRAT        | ENST00000336356.3 | hsa-miR-182-3p | -0,2  | -0,2  |
| CCDC141     | ENST00000420890.2 | hsa-miR-182-3p | -0,2  | -0,2  |
| GIMAP5      | ENST00000358647.3 | hsa-miR-182-3p | -0,2  | -0,2  |
| ATG4A       | ENST00000372232.3 | hsa-miR-182-3p | -0,2  | -0,2  |
| MAML2       | ENST00000524717.1 | hsa-miR-182-3p | -0,2  | -0,34 |
| WDR26       | ENST00000414423.2 | hsa-miR-182-3p | -0,2  | -0,2  |
| DOCK9       | ENST00000376460.1 | hsa-miR-182-3p | -0,2  | -0,2  |
| FBRSL1      | ENST00000434748.2 | hsa-miR-182-3p | -0,2  | -0,2  |
| ARHGAP24    | ENST00000395184.1 | hsa-miR-182-3p | -0,2  | -0,2  |
| FAM227A     | ENST00000535113.1 | hsa-miR-182-3p | -0,2  | -0,27 |
| MSL3        | ENST00000312196.4 | hsa-miR-182-3p | -0,2  | -0,41 |
| SMC5        | ENST00000361138.5 | hsa-miR-182-3p | -0,2  | -0,23 |
| BEND4       | ENST00000504360.1 | hsa-miR-182-3p | -0,2  | -0,2  |
| TRAK1       | ENST00000341421.3 | hsa-miR-182-3p | -0,2  | -0,21 |
| TMEM150A    | ENST00000306353.3 | hsa-miR-182-3p | -0,2  | -0,21 |
| B3GALT2     | ENST00000367434.4 | hsa-miR-182-3p | -0,2  | -0,2  |



|                |                   |                |       |       |
|----------------|-------------------|----------------|-------|-------|
| CDPF1          | ENST00000404744.1 | hsa-miR-182-3p | -0,2  | -0,2  |
| SIRPB2         | ENST00000359801.3 | hsa-miR-182-3p | -0,2  | -0,2  |
| RXR8           | ENST00000374685.4 | hsa-miR-182-3p | -0,2  | -0,2  |
| NAA20          | ENST00000310450.4 | hsa-miR-182-3p | -0,2  | -0,2  |
| ATP6V1H        | ENST00000355221.3 | hsa-miR-182-3p | -0,2  | -0,2  |
| SPTBN1         | ENST00000356805.4 | hsa-miR-182-3p | -0,2  | -0,2  |
| SGTB           | ENST00000381007.4 | hsa-miR-182-3p | -0,2  | -0,25 |
| MEA1           | ENST00000244711.3 | hsa-miR-182-3p | -0,2  | -0,2  |
| GPR97          | ENST00000333493.4 | hsa-miR-182-3p | -0,2  | -0,2  |
| AGT            | ENST00000366667.4 | hsa-miR-182-3p | -0,2  | -0,2  |
| NSFL1C         | ENST00000353088.2 | hsa-miR-182-3p | -0,2  | -0,21 |
| ENTPD6         | ENST00000433259.2 | hsa-miR-182-3p | -0,2  | -0,2  |
| ONECUT1        | ENST00000560699.2 | hsa-miR-182-3p | -0,2  | -0,2  |
| TCP11L2        | ENST00000547153.1 | hsa-miR-182-3p | -0,2  | -0,2  |
| ZNF80          | ENST00000482457.2 | hsa-miR-182-3p | -0,2  | -0,2  |
| ZC4H2          | ENST00000545618.1 | hsa-miR-182-3p | -0,2  | -0,2  |
| SOCS7          | ENST00000577233.1 | hsa-miR-182-3p | -0,2  | -0,23 |
| UBE2G2         | ENST00000345496.2 | hsa-miR-182-3p | -0,2  | -0,2  |
| DAPK2          | ENST00000261891.3 | hsa-miR-182-3p | -0,2  | -0,22 |
| CCZ1B          | ENST00000316731.8 | hsa-miR-182-3p | -0,2  | -0,2  |
| MRPS10         | ENST00000053468.3 | hsa-miR-182-3p | -0,2  | -0,2  |
| S100A7A        | ENST00000368729.4 | hsa-miR-182-3p | -0,2  | -0,2  |
| MAGI2          | ENST00000419488.1 | hsa-miR-182-3p | -0,2  | -0,2  |
| TMPRSS4        | ENST00000534111.1 | hsa-miR-182-3p | -0,2  | -0,2  |
| GSTM5          | ENST00000369813.1 | hsa-miR-182-3p | -0,2  | -0,2  |
| TTC22          | ENST00000371276.4 | hsa-miR-182-3p | -0,2  | -0,2  |
| CCNK           | ENST00000389879.5 | hsa-miR-182-3p | -0,2  | -0,2  |
| CHAD           | ENST00000258969.4 | hsa-miR-182-3p | -0,2  | -0,2  |
| KDSR           | ENST00000406396.3 | hsa-miR-182-3p | -0,2  | -0,31 |
| PIK3CD         | ENST00000536656.1 | hsa-miR-182-3p | -0,2  | -0,2  |
| PPEF2          | ENST00000286719.7 | hsa-miR-182-3p | -0,2  | -0,2  |
| NPFFR2         | ENST00000344413.5 | hsa-miR-182-3p | -0,2  | -0,2  |
| C16orf98       | ENST00000561916.2 | hsa-miR-182-3p | -0,2  | -0,2  |
| HUWE1          | ENST00000342160.3 | hsa-miR-182-3p | -0,2  | -0,2  |
| PLEKHA1        | ENST00000538022.1 | hsa-miR-182-3p | -0,2  | -0,2  |
| SPNS2          | ENST00000329078.3 | hsa-miR-182-3p | -0,2  | -0,2  |
| SLC45A3        | ENST00000367145.3 | hsa-miR-182-3p | -0,2  | -0,2  |
| AP3S1          | ENST00000316788.7 | hsa-miR-182-3p | -0,2  | -0,2  |
| C15orf38-AP3S2 | ENST00000398333.3 | hsa-miR-182-3p | -0,19 | -0,2  |
| DZIP1L         | ENST00000327532.2 | hsa-miR-182-3p | -0,19 | -0,22 |
| FBXO28         | ENST00000424254.2 | hsa-miR-182-3p | -0,19 | -0,38 |
| FCRLA          | ENST00000367959.2 | hsa-miR-182-3p | -0,19 | -0,19 |
| ANKRD34B       | ENST00000338682.3 | hsa-miR-182-3p | -0,19 | -0,19 |
| CNN3           | ENST00000370206.4 | hsa-miR-182-3p | -0,19 | -0,19 |
| ARHGEF35       | ENST00000378115.2 | hsa-miR-182-3p | -0,19 | -0,19 |
| ZNF227         | ENST00000313040.7 | hsa-miR-182-3p | -0,19 | -0,19 |
| CHM            | ENST00000357749.2 | hsa-miR-182-3p | -0,19 | -0,19 |
| GP5            | ENST00000401815.1 | hsa-miR-182-3p | -0,19 | -0,19 |
| LUC7L3         | ENST00000505658.1 | hsa-miR-182-3p | -0,19 | -0,22 |
| AP000867.1     | ENST00000343767.3 | hsa-miR-182-3p | -0,19 | -0,19 |
| TPD52          | ENST00000379096.5 | hsa-miR-182-3p | -0,19 | -0,2  |
| DCLK3          | ENST00000416516.2 | hsa-miR-182-3p | -0,19 | -0,19 |
| SLC39A10       | ENST00000409086.3 | hsa-miR-182-3p | -0,19 | -0,2  |
| CACNG3         | ENST00000005284.3 | hsa-miR-182-3p | -0,19 | -0,19 |
| CDK2           | ENST00000266970.4 | hsa-miR-182-3p | -0,19 | -0,19 |
| LPPR1          | ENST00000374874.3 | hsa-miR-182-3p | -0,19 | -0,19 |
| SH3BP5         | ENST00000383791.3 | hsa-miR-182-3p | -0,19 | -0,3  |
| PPAP2A         | ENST00000264775.5 | hsa-miR-182-3p | -0,19 | -0,25 |
| ALG6           | ENST00000371108.4 | hsa-miR-182-3p | -0,19 | -0,25 |
| CCDC113        | ENST00000443128.2 | hsa-miR-182-3p | -0,19 | -0,2  |
| ELOVL5         | ENST00000370918.4 | hsa-miR-182-3p | -0,19 | -0,19 |
| NRG1           | ENST00000341377.5 | hsa-miR-182-3p | -0,19 | -0,2  |
| CNR2           | ENST00000374472.4 | hsa-miR-182-3p | -0,19 | -0,19 |
| CHST9          | ENST00000580774.1 | hsa-miR-182-3p | -0,19 | -0,19 |
| AL590452.1     | ENST00000596396.1 | hsa-miR-182-3p | -0,19 | -0,19 |
| WWC3           | ENST00000380861.4 | hsa-miR-182-3p | -0,19 | -0,19 |

|          |                   |                |       |       |
|----------|-------------------|----------------|-------|-------|
| CHMP7    | ENST00000313219.7 | hsa-miR-182-3p | -0,19 | -0,19 |
| NCALD    | ENST00000395923.1 | hsa-miR-182-3p | -0,19 | -0,19 |
| ADARB2   | ENST00000381312.1 | hsa-miR-182-3p | -0,19 | -0,19 |
| CNTF     | ENST00000361987.4 | hsa-miR-182-3p | -0,19 | -0,22 |
| RWDD2B   | ENST00000493196.1 | hsa-miR-182-3p | -0,19 | -0,23 |
| PRDX3    | ENST00000356951.3 | hsa-miR-182-3p | -0,19 | -0,19 |
| ITK      | ENST00000422843.3 | hsa-miR-182-3p | -0,19 | -0,19 |
| SIGLECL1 | ENST00000316401.7 | hsa-miR-182-3p | -0,19 | -0,19 |
| DDX21    | ENST00000354185.4 | hsa-miR-182-3p | -0,19 | -0,21 |
| RABGEF1  | ENST00000284957.5 | hsa-miR-182-3p | -0,19 | -0,29 |
| ZNF709   | ENST00000397732.3 | hsa-miR-182-3p | -0,19 | -0,26 |
| MURC     | ENST00000307584.5 | hsa-miR-182-3p | -0,19 | -0,32 |
| SYNJ2BP  | ENST00000256366.4 | hsa-miR-182-3p | -0,19 | -0,46 |
| C3orf52  | ENST00000264848.5 | hsa-miR-182-3p | -0,19 | -0,19 |
| PCK1     | ENST00000319441.4 | hsa-miR-182-3p | -0,19 | -0,19 |
| YWHAE    | ENST00000264335.8 | hsa-miR-182-3p | -0,19 | -0,19 |
| BRINP2   | ENST00000361539.4 | hsa-miR-182-3p | -0,19 | -0,19 |
| SLC38A11 | ENST00000303735.4 | hsa-miR-182-3p | -0,19 | -0,19 |
| GNG2     | ENST00000556752.1 | hsa-miR-182-3p | -0,19 | -0,19 |
| ADAM9    | ENST00000487273.2 | hsa-miR-182-3p | -0,19 | -0,19 |
| SH3TC2   | ENST00000502274.1 | hsa-miR-182-3p | -0,19 | -0,59 |
| SCGB2A2  | ENST00000525380.1 | hsa-miR-182-3p | -0,19 | -0,19 |
| TM4SF1   | ENST00000472441.1 | hsa-miR-182-3p | -0,19 | -0,19 |
| SLC6A4   | ENST00000401766.2 | hsa-miR-182-3p | -0,19 | -0,19 |
| CCDC18   | ENST00000334652.5 | hsa-miR-182-3p | -0,19 | -0,19 |
| LIN54    | ENST00000395282.2 | hsa-miR-182-3p | -0,19 | -0,23 |
| SPAG1    | ENST00000251809.3 | hsa-miR-182-3p | -0,19 | -0,19 |
| HDGFL1   | ENST00000510882.2 | hsa-miR-182-3p | -0,19 | -0,19 |
| AZI2     | ENST00000479665.1 | hsa-miR-182-3p | -0,19 | -0,34 |
| ZNF891   | ENST00000537226.1 | hsa-miR-182-3p | -0,19 | -0,27 |
| DYNLT3   | ENST00000378581.3 | hsa-miR-182-3p | -0,19 | -0,23 |
| IQCA1    | ENST00000409907.3 | hsa-miR-182-3p | -0,19 | -0,19 |
| NF1      | ENST00000358273.4 | hsa-miR-182-3p | -0,19 | -0,19 |
| POU2F1   | ENST00000367866.2 | hsa-miR-182-3p | -0,19 | -0,2  |
| TTC3     | ENST00000399017.2 | hsa-miR-182-3p | -0,19 | -0,21 |
| RNASEH2A | ENST00000221486.4 | hsa-miR-182-3p | -0,19 | -0,25 |
| DNAH6    | ENST00000389394.3 | hsa-miR-182-3p | -0,19 | -0,19 |
| SENP8    | ENST00000544411.1 | hsa-miR-182-3p | -0,19 | -0,19 |
| CEACAM3  | ENST00000221999.4 | hsa-miR-182-3p | -0,19 | -0,19 |
| DDAH2    | ENST00000375789.2 | hsa-miR-182-3p | -0,19 | -0,2  |
| TRIM71   | ENST00000383763.5 | hsa-miR-182-3p | -0,19 | -0,22 |
| ACTG1    | ENST00000331925.2 | hsa-miR-182-3p | -0,19 | -0,19 |
| C2orf43  | ENST00000440866.2 | hsa-miR-182-3p | -0,19 | -0,19 |
| SLC35B4  | ENST00000378509.4 | hsa-miR-182-3p | -0,19 | -0,21 |
| FOXJ3    | ENST00000372571.1 | hsa-miR-182-3p | -0,19 | -0,19 |
| FGF7     | ENST00000267843.4 | hsa-miR-182-3p | -0,19 | -0,19 |
| KALRN    | ENST00000393496.1 | hsa-miR-182-3p | -0,19 | -0,19 |
| SLC6A16  | ENST00000454748.3 | hsa-miR-182-3p | -0,19 | -0,19 |
| ADM2     | ENST00000395738.2 | hsa-miR-182-3p | -0,19 | -0,19 |
| RALGPS1  | ENST00000259351.5 | hsa-miR-182-3p | -0,19 | -0,22 |
| FAM105A  | ENST00000274217.3 | hsa-miR-182-3p | -0,19 | -0,29 |
| B4GALT1  | ENST00000379731.4 | hsa-miR-182-3p | -0,19 | -0,2  |
| MUC22    | ENST00000561890.1 | hsa-miR-182-3p | -0,18 | -0,18 |
| CBLN2    | ENST00000585159.1 | hsa-miR-182-3p | -0,18 | -0,18 |
| CTAGE8   | ENST00000487179.1 | hsa-miR-182-3p | -0,18 | -0,18 |
| CMKLR1   | ENST00000312143.7 | hsa-miR-182-3p | -0,18 | -0,18 |
| CTAGE4   | ENST00000486333.1 | hsa-miR-182-3p | -0,18 | -0,18 |
| FAM154A  | ENST00000380530.1 | hsa-miR-182-3p | -0,18 | -0,18 |
| RAB3IP   | ENST00000483530.2 | hsa-miR-182-3p | -0,18 | -0,32 |
| TAZ      | ENST00000299328.5 | hsa-miR-182-3p | -0,18 | -0,18 |
| NAP1L1   | ENST00000261182.8 | hsa-miR-182-3p | -0,18 | -0,18 |
| NR1I2    | ENST00000393716.2 | hsa-miR-182-3p | -0,18 | -0,18 |
| ST8SIA3  | ENST00000324000.3 | hsa-miR-182-3p | -0,18 | -0,18 |
| BTN1A1   | ENST00000244513.6 | hsa-miR-182-3p | -0,18 | -0,18 |
| B4GALT4  | ENST00000467604.1 | hsa-miR-182-3p | -0,18 | -0,18 |
| TPM3     | ENST00000368531.2 | hsa-miR-182-3p | -0,18 | -0,19 |

|              |                   |                |       |       |
|--------------|-------------------|----------------|-------|-------|
| DKK2         | ENST00000285311.3 | hsa-miR-182-3p | -0,18 | -0,18 |
| RAN          | ENST00000543796.1 | hsa-miR-182-3p | -0,18 | -0,29 |
| CDKL2        | ENST00000429927.2 | hsa-miR-182-3p | -0,18 | -0,22 |
| PCMTD2       | ENST00000308824.6 | hsa-miR-182-3p | -0,18 | -0,21 |
| STT3B        | ENST00000295770.2 | hsa-miR-182-3p | -0,18 | -0,19 |
| MDM4         | ENST00000391947.2 | hsa-miR-182-3p | -0,18 | -0,19 |
| NARS2        | ENST00000281038.5 | hsa-miR-182-3p | -0,18 | -0,18 |
| TMEM248      | ENST00000341567.4 | hsa-miR-182-3p | -0,18 | -0,18 |
| ANAPC15      | ENST00000543587.1 | hsa-miR-182-3p | -0,18 | -0,18 |
| PRAMEF19     | ENST00000540591.1 | hsa-miR-182-3p | -0,18 | -0,18 |
| GNAS         | ENST00000371075.3 | hsa-miR-182-3p | -0,18 | -0,18 |
| C1orf177     | ENST00000358193.3 | hsa-miR-182-3p | -0,18 | -0,18 |
| PHYHIPL      | ENST00000373880.4 | hsa-miR-182-3p | -0,18 | -0,18 |
| MINPP1       | ENST00000371994.4 | hsa-miR-182-3p | -0,18 | -0,18 |
| PRAMEF18     | ENST00000376126.2 | hsa-miR-182-3p | -0,18 | -0,18 |
| BNIP2        | ENST00000267859.3 | hsa-miR-182-3p | -0,18 | -0,18 |
| ANKRD50      | ENST00000504087.1 | hsa-miR-182-3p | -0,18 | -0,34 |
| DAZ3         | ENST00000382365.2 | hsa-miR-182-3p | -0,18 | -0,18 |
| CWC25        | ENST00000225428.5 | hsa-miR-182-3p | -0,18 | -0,32 |
| GORAB        | ENST00000367763.3 | hsa-miR-182-3p | -0,18 | -0,18 |
| GRAMD1C      | ENST00000358160.4 | hsa-miR-182-3p | -0,18 | -0,18 |
| LRRC66       | ENST00000343457.3 | hsa-miR-182-3p | -0,18 | -0,18 |
| CGN          | ENST00000271636.7 | hsa-miR-182-3p | -0,18 | -0,18 |
| FZD4         | ENST00000531380.1 | hsa-miR-182-3p | -0,18 | -0,18 |
| PTDSS1       | ENST00000517309.1 | hsa-miR-182-3p | -0,18 | -0,21 |
| RASSF3       | ENST00000542104.1 | hsa-miR-182-3p | -0,18 | -0,2  |
| NUDT5        | ENST00000491614.1 | hsa-miR-182-3p | -0,18 | -0,19 |
| NT5DC1       | ENST00000319550.4 | hsa-miR-182-3p | -0,18 | -0,27 |
| ATXN7L1      | ENST00000419735.3 | hsa-miR-182-3p | -0,18 | -0,2  |
| VEZF1        | ENST00000584396.1 | hsa-miR-182-3p | -0,18 | -0,18 |
| TRIP13       | ENST00000166345.3 | hsa-miR-182-3p | -0,18 | -0,18 |
| TRABD2A      | ENST00000409133.1 | hsa-miR-182-3p | -0,18 | -0,19 |
| PAX9         | ENST00000361487.6 | hsa-miR-182-3p | -0,18 | -0,18 |
| ZNF217       | ENST00000371471.2 | hsa-miR-182-3p | -0,18 | -0,18 |
| DCAF4L1      | ENST00000333141.5 | hsa-miR-182-3p | -0,18 | -0,18 |
| GTF2H1       | ENST00000265963.4 | hsa-miR-182-3p | -0,18 | -0,18 |
| GOLGA7B      | ENST00000370602.1 | hsa-miR-182-3p | -0,18 | -0,18 |
| RP5-105215.2 | ENST00000370548.2 | hsa-miR-182-3p | -0,18 | -0,18 |
| POU4F1       | ENST00000377208.5 | hsa-miR-182-3p | -0,18 | -0,19 |
| RSF1         | ENST00000308488.6 | hsa-miR-182-3p | -0,18 | -0,21 |
| COTL1        | ENST00000262428.4 | hsa-miR-182-3p | -0,18 | -0,18 |
| APOBEC3C     | ENST00000361441.4 | hsa-miR-182-3p | -0,18 | -0,18 |
| MORC3        | ENST00000400485.1 | hsa-miR-182-3p | -0,18 | -0,18 |
| ACTN4        | ENST00000252699.2 | hsa-miR-182-3p | -0,18 | -0,18 |
| LONRF2       | ENST00000393437.3 | hsa-miR-182-3p | -0,18 | -0,19 |
| EWSR1        | ENST00000397938.2 | hsa-miR-182-3p | -0,18 | -0,18 |
| MEIS2        | ENST00000397624.3 | hsa-miR-182-3p | -0,18 | -0,19 |
| TMTC1        | ENST00000256062.5 | hsa-miR-182-3p | -0,18 | -0,19 |
| ZDHHC11      | ENST00000424784.2 | hsa-miR-182-3p | -0,18 | -0,18 |
| PGGT1B       | ENST00000419445.1 | hsa-miR-182-3p | -0,18 | -0,2  |
| CCBL1        | ENST00000302586.3 | hsa-miR-182-3p | -0,18 | -0,26 |
| PLA2R1       | ENST00000283243.7 | hsa-miR-182-3p | -0,18 | -0,18 |
| AC135983.2   | ENST00000593303.1 | hsa-miR-182-3p | -0,18 | -0,18 |
| BSDC1        | ENST00000341071.7 | hsa-miR-182-3p | -0,18 | -0,18 |
| MARCH1       | ENST00000274056.7 | hsa-miR-182-3p | -0,18 | -0,18 |
| APOL1        | ENST00000422706.1 | hsa-miR-182-3p | -0,18 | -0,18 |
| EXD2         | ENST00000409018.3 | hsa-miR-182-3p | -0,18 | -0,18 |
| WDR12        | ENST00000261015.4 | hsa-miR-182-3p | -0,18 | -0,18 |
| PIRT         | ENST00000580256.2 | hsa-miR-182-3p | -0,18 | -0,18 |
| SCRG1        | ENST00000296506.3 | hsa-miR-182-3p | -0,18 | -0,18 |
| SYT14        | ENST00000399639.2 | hsa-miR-182-3p | -0,18 | -0,18 |
| RIPK1        | ENST00000380409.2 | hsa-miR-182-3p | -0,18 | -0,19 |
| THAP1        | ENST00000345117.2 | hsa-miR-182-3p | -0,18 | -0,32 |
| SYT4         | ENST00000255224.3 | hsa-miR-182-3p | -0,18 | -0,18 |
| MAP2K4       | ENST00000415385.3 | hsa-miR-182-3p | -0,18 | -0,18 |
| HES2         | ENST00000377834.4 | hsa-miR-182-3p | -0,18 | -0,18 |

|               |                   |                |       |       |
|---------------|-------------------|----------------|-------|-------|
| TEX35         | ENST00000367642.3 | hsa-miR-182-3p | -0,18 | -0,18 |
| DPPA4         | ENST00000335658.6 | hsa-miR-182-3p | -0,18 | -0,18 |
| GPR151        | ENST00000311104.2 | hsa-miR-182-3p | -0,18 | -0,18 |
| LRRC57        | ENST00000397130.3 | hsa-miR-182-3p | -0,18 | -0,18 |
| MISP          | ENST00000215582.6 | hsa-miR-182-3p | -0,18 | -0,18 |
| ZNF256        | ENST00000598928.1 | hsa-miR-182-3p | -0,18 | -0,18 |
| C1orf123      | ENST00000294360.4 | hsa-miR-182-3p | -0,18 | -0,27 |
| ERO1L         | ENST00000395686.3 | hsa-miR-182-3p | -0,18 | -0,23 |
| RAPGEF5       | ENST00000401957.2 | hsa-miR-182-3p | -0,17 | -0,17 |
| FABP7         | ENST00000356535.4 | hsa-miR-182-3p | -0,17 | -0,17 |
| DPYSL3        | ENST00000398514.3 | hsa-miR-182-3p | -0,17 | -0,19 |
| FBXW8         | ENST00000455858.2 | hsa-miR-182-3p | -0,17 | -0,24 |
| CMBL          | ENST00000296658.3 | hsa-miR-182-3p | -0,17 | -0,23 |
| SLC22A3       | ENST00000392145.1 | hsa-miR-182-3p | -0,17 | -0,17 |
| CSF1R         | ENST00000286301.3 | hsa-miR-182-3p | -0,17 | -0,17 |
| METTL13       | ENST00000362019.3 | hsa-miR-182-3p | -0,17 | -0,2  |
| UAP1L1        | ENST00000360271.3 | hsa-miR-182-3p | -0,17 | -0,17 |
| LARP4B        | ENST00000316157.3 | hsa-miR-182-3p | -0,17 | -0,17 |
| TNR           | ENST00000367674.2 | hsa-miR-182-3p | -0,17 | -0,17 |
| MED27         | ENST00000357028.2 | hsa-miR-182-3p | -0,17 | -0,17 |
| YEATS2        | ENST00000305135.5 | hsa-miR-182-3p | -0,17 | -0,17 |
| HOXB4         | ENST00000332503.5 | hsa-miR-182-3p | -0,17 | -0,18 |
| KCTD15        | ENST00000284006.6 | hsa-miR-182-3p | -0,17 | -0,19 |
| LRRC55        | ENST00000497933.1 | hsa-miR-182-3p | -0,17 | -0,17 |
| MS4A6A        | ENST00000528851.1 | hsa-miR-182-3p | -0,17 | -0,17 |
| BMP2          | ENST00000378827.4 | hsa-miR-182-3p | -0,17 | -0,25 |
| CTAGE9        | ENST00000314099.8 | hsa-miR-182-3p | -0,17 | -0,17 |
| DAZ2          | ENST00000382449.1 | hsa-miR-182-3p | -0,17 | -0,17 |
| SNAI3         | ENST00000332281.5 | hsa-miR-182-3p | -0,17 | -0,17 |
| ACVR1B        | ENST00000257963.4 | hsa-miR-182-3p | -0,17 | -0,17 |
| C2orf68       | ENST00000306336.5 | hsa-miR-182-3p | -0,17 | -0,23 |
| ZNF197        | ENST00000383745.2 | hsa-miR-182-3p | -0,17 | -0,18 |
| NPL           | ENST00000367553.1 | hsa-miR-182-3p | -0,17 | -0,17 |
| TPH2          | ENST00000333850.3 | hsa-miR-182-3p | -0,17 | -0,17 |
| GYPB          | ENST00000283126.7 | hsa-miR-182-3p | -0,17 | -0,17 |
| THTPA         | ENST00000288014.6 | hsa-miR-182-3p | -0,17 | -0,17 |
| PA2G4         | ENST00000303305.6 | hsa-miR-182-3p | -0,17 | -0,17 |
| FAM117B       | ENST00000392238.2 | hsa-miR-182-3p | -0,17 | -0,17 |
| ZNF410        | ENST00000555044.1 | hsa-miR-182-3p | -0,17 | -0,17 |
| ATOX1         | ENST00000521264.1 | hsa-miR-182-3p | -0,17 | -0,19 |
| CTD-2267D19.3 | ENST00000578774.1 | hsa-miR-182-3p | -0,17 | -0,18 |
| MFSD9         | ENST00000258436.5 | hsa-miR-182-3p | -0,17 | -0,2  |
| ENTPD7        | ENST00000370489.4 | hsa-miR-182-3p | -0,17 | -0,18 |
| RND2          | ENST00000544533.1 | hsa-miR-182-3p | -0,17 | -0,17 |
| RTN4RL1       | ENST00000331238.6 | hsa-miR-182-3p | -0,17 | -0,17 |
| GOLGA1        | ENST00000373555.4 | hsa-miR-182-3p | -0,17 | -0,17 |
| SCAMP1        | ENST00000538629.1 | hsa-miR-182-3p | -0,17 | -0,17 |
| FAM160B1      | ENST00000369248.4 | hsa-miR-182-3p | -0,17 | -0,17 |
| RAB3D         | ENST00000222120.3 | hsa-miR-182-3p | -0,17 | -0,17 |
| FUT9          | ENST00000302103.5 | hsa-miR-182-3p | -0,17 | -0,17 |
| IL2RA         | ENST00000379959.3 | hsa-miR-182-3p | -0,17 | -0,17 |
| HCAR2         | ENST00000328880.5 | hsa-miR-182-3p | -0,17 | -0,17 |
| CSTF2T        | ENST00000331173.4 | hsa-miR-182-3p | -0,17 | -0,17 |
| KCTD21        | ENST00000340067.3 | hsa-miR-182-3p | -0,17 | -0,17 |
| BCAM          | ENST00000270233.6 | hsa-miR-182-3p | -0,17 | -0,17 |
| PDXDC1        | ENST00000396410.4 | hsa-miR-182-3p | -0,17 | -0,17 |
| FRY           | ENST00000380250.3 | hsa-miR-182-3p | -0,17 | -0,17 |
| METTL6        | ENST00000443029.1 | hsa-miR-182-3p | -0,17 | -0,17 |
| ACO1          | ENST00000309951.6 | hsa-miR-182-3p | -0,17 | -0,21 |
| SCML1         | ENST00000380045.3 | hsa-miR-182-3p | -0,17 | -0,17 |
| CLOCK         | ENST00000309964.4 | hsa-miR-182-3p | -0,17 | -0,19 |
| ADAM12        | ENST00000368679.4 | hsa-miR-182-3p | -0,17 | -0,17 |
| KIT           | ENST00000288135.5 | hsa-miR-182-3p | -0,17 | -0,17 |
| ANKRD13A      | ENST00000261739.4 | hsa-miR-182-3p | -0,17 | -0,17 |
| MKS1          | ENST00000313863.6 | hsa-miR-182-3p | -0,17 | -0,17 |
| ZNF768        | ENST00000380412.5 | hsa-miR-182-3p | -0,17 | -0,17 |

|           |                   |                |       |       |
|-----------|-------------------|----------------|-------|-------|
| ESCO2     | ENST00000305188.8 | hsa-miR-182-3p | -0,17 | -0,23 |
| KLHL32    | ENST00000369261.4 | hsa-miR-182-3p | -0,17 | -0,17 |
| KCNJ15    | ENST00000328656.4 | hsa-miR-182-3p | -0,17 | -0,17 |
| ING5      | ENST00000313552.6 | hsa-miR-182-3p | -0,17 | -0,17 |
| PRKAA2    | ENST00000371244.4 | hsa-miR-182-3p | -0,17 | -0,17 |
| ZIC3      | ENST00000287538.5 | hsa-miR-182-3p | -0,17 | -0,17 |
| XPOT      | ENST00000332707.5 | hsa-miR-182-3p | -0,17 | -0,23 |
| PRPF38B   | ENST00000370025.4 | hsa-miR-182-3p | -0,17 | -0,19 |
| CAV1      | ENST00000405348.1 | hsa-miR-182-3p | -0,17 | -0,23 |
| AGGF1     | ENST00000312916.7 | hsa-miR-182-3p | -0,17 | -0,17 |
| DUSP27    | ENST00000443333.1 | hsa-miR-182-3p | -0,17 | -0,17 |
| IPO9      | ENST00000361565.4 | hsa-miR-182-3p | -0,17 | -0,23 |
| NME1      | ENST00000511355.1 | hsa-miR-182-3p | -0,17 | -0,17 |
| GJA3      | ENST00000241125.3 | hsa-miR-182-3p | -0,17 | -0,17 |
| GPR62     | ENST00000322241.4 | hsa-miR-182-3p | -0,17 | -0,17 |
| ABCA5     | ENST00000392676.3 | hsa-miR-182-3p | -0,17 | -0,29 |
| CD300LB   | ENST00000392621.1 | hsa-miR-182-3p | -0,17 | -0,28 |
| CUL5      | ENST00000393094.2 | hsa-miR-182-3p | -0,17 | -0,17 |
| POTEE     | ENST00000358087.5 | hsa-miR-182-3p | -0,17 | -0,17 |
| GABRA1    | ENST00000428797.2 | hsa-miR-182-3p | -0,17 | -0,17 |
| IGF1R     | ENST00000268035.6 | hsa-miR-182-3p | -0,17 | -0,19 |
| C17orf77  | ENST00000392620.1 | hsa-miR-182-3p | -0,17 | -0,17 |
| DGAT2L6   | ENST00000333026.3 | hsa-miR-182-3p | -0,17 | -0,17 |
| COL8A2    | ENST00000303143.4 | hsa-miR-182-3p | -0,17 | -0,17 |
| ARL4C     | ENST00000390645.2 | hsa-miR-182-3p | -0,17 | -0,18 |
| ATRN1     | ENST00000355044.3 | hsa-miR-182-3p | -0,17 | -0,17 |
| RAB11B    | ENST00000328024.6 | hsa-miR-182-3p | -0,17 | -0,17 |
| GPR35     | ENST00000319838.5 | hsa-miR-182-3p | -0,17 | -0,2  |
| C21orf58  | ENST00000397683.1 | hsa-miR-182-3p | -0,17 | -0,17 |
| PBX1      | ENST00000367897.1 | hsa-miR-182-3p | -0,17 | -0,23 |
| POGLUT1   | ENST00000295588.4 | hsa-miR-182-3p | -0,17 | -0,2  |
| PTK2      | ENST00000522684.1 | hsa-miR-182-3p | -0,17 | -0,23 |
| HIST1H2BK | ENST00000396891.4 | hsa-miR-182-3p | -0,17 | -0,39 |
| LRG1      | ENST00000306390.6 | hsa-miR-182-3p | -0,17 | -0,17 |
| ADRA1A    | ENST00000380586.1 | hsa-miR-182-3p | -0,17 | -0,17 |
| FAM196A   | ENST00000522781.1 | hsa-miR-182-3p | -0,17 | -0,17 |
| RNF223    | ENST00000453464.2 | hsa-miR-182-3p | -0,17 | -0,17 |
| IL4R      | ENST00000395762.2 | hsa-miR-182-3p | -0,17 | -0,17 |
| TMEM106C  | ENST00000429772.2 | hsa-miR-182-3p | -0,17 | -0,17 |
| TGFB3     | ENST00000238682.3 | hsa-miR-182-3p | -0,17 | -0,17 |
| JPH3      | ENST00000284262.2 | hsa-miR-182-3p | -0,17 | -0,17 |
| SRRM4     | ENST00000267260.4 | hsa-miR-182-3p | -0,17 | -0,17 |
| PRADC1    | ENST00000258083.2 | hsa-miR-182-3p | -0,17 | -0,17 |
| CABP5     | ENST00000293255.2 | hsa-miR-182-3p | -0,17 | -0,17 |
| WDR48     | ENST00000302313.5 | hsa-miR-182-3p | -0,16 | -0,17 |
| SREK1     | ENST00000334121.6 | hsa-miR-182-3p | -0,16 | -0,26 |
| MPHOSPH8  | ENST00000361479.5 | hsa-miR-182-3p | -0,16 | -0,22 |
| ZNF354C   | ENST00000315475.6 | hsa-miR-182-3p | -0,16 | -0,16 |
| RND1      | ENST00000309739.5 | hsa-miR-182-3p | -0,16 | -0,16 |
| FXR2      | ENST00000250113.7 | hsa-miR-182-3p | -0,16 | -0,16 |
| ZNF282    | ENST00000479907.1 | hsa-miR-182-3p | -0,16 | -0,16 |
| PWWP2A    | ENST00000456329.3 | hsa-miR-182-3p | -0,16 | -0,17 |
| EBF2      | ENST00000535548.1 | hsa-miR-182-3p | -0,16 | -0,32 |
| BVES      | ENST00000314641.5 | hsa-miR-182-3p | -0,16 | -0,2  |
| SLC6A7    | ENST00000524041.1 | hsa-miR-182-3p | -0,16 | -0,16 |
| ABHD12B   | ENST00000353130.1 | hsa-miR-182-3p | -0,16 | -0,16 |
| DSPP      | ENST00000282478.7 | hsa-miR-182-3p | -0,16 | -0,16 |
| TERF2     | ENST00000254942.3 | hsa-miR-182-3p | -0,16 | -0,16 |
| TNFAIP2   | ENST00000560869.1 | hsa-miR-182-3p | -0,16 | -0,16 |
| TLR7      | ENST00000380659.3 | hsa-miR-182-3p | -0,16 | -0,16 |
| PATZ1     | ENST00000405309.3 | hsa-miR-182-3p | -0,16 | -0,16 |
| RPRD1B    | ENST00000373433.4 | hsa-miR-182-3p | -0,16 | -0,16 |
| SLC16A13  | ENST00000308027.6 | hsa-miR-182-3p | -0,16 | -0,17 |
| TMEM192   | ENST00000306480.6 | hsa-miR-182-3p | -0,16 | -0,17 |
| PHOSPHO1  | ENST00000310544.4 | hsa-miR-182-3p | -0,16 | -0,16 |
| GRAP      | ENST00000284154.5 | hsa-miR-182-3p | -0,16 | -0,16 |

|           |                   |                |       |       |
|-----------|-------------------|----------------|-------|-------|
| NHLH1     | ENST00000302101.5 | hsa-miR-182-3p | -0,16 | -0,16 |
| RPS6KB1   | ENST00000225577.4 | hsa-miR-182-3p | -0,16 | -0,16 |
| SLC1A2    | ENST00000278379.3 | hsa-miR-182-3p | -0,16 | -0,16 |
| HTR5A-AS1 | ENST00000395731.2 | hsa-miR-182-3p | -0,16 | -0,16 |
| FAM126A   | ENST00000409923.1 | hsa-miR-182-3p | -0,16 | -0,16 |
| ARL10     | ENST00000310389.5 | hsa-miR-182-3p | -0,16 | -0,16 |
| RAC1      | ENST00000348035.4 | hsa-miR-182-3p | -0,16 | -0,17 |
| OPCML     | ENST00000331898.7 | hsa-miR-182-3p | -0,16 | -0,16 |
| ABCA13    | ENST00000544596.1 | hsa-miR-182-3p | -0,16 | -0,16 |
| ITGA8     | ENST00000378076.3 | hsa-miR-182-3p | -0,16 | -0,16 |
| SUV39H1   | ENST00000453214.2 | hsa-miR-182-3p | -0,16 | -0,16 |
| ROCK1     | ENST00000399799.2 | hsa-miR-182-3p | -0,16 | -0,16 |
| UBE2Z     | ENST00000360943.5 | hsa-miR-182-3p | -0,16 | -0,16 |
| NT5DC3    | ENST00000392876.3 | hsa-miR-182-3p | -0,16 | -0,16 |
| DAZ4      | ENST00000382290.3 | hsa-miR-182-3p | -0,16 | -0,16 |
| MCUR1     | ENST00000379170.4 | hsa-miR-182-3p | -0,16 | -0,16 |
| PTPRK     | ENST00000368226.4 | hsa-miR-182-3p | -0,16 | -0,17 |
| GZF1      | ENST00000338121.5 | hsa-miR-182-3p | -0,16 | -0,16 |
| LTBP2     | ENST00000261978.4 | hsa-miR-182-3p | -0,16 | -0,22 |
| PRPF19    | ENST00000227524.4 | hsa-miR-182-3p | -0,16 | -0,16 |
| PTPLB     | ENST00000383657.5 | hsa-miR-182-3p | -0,16 | -0,16 |
| GHR       | ENST00000230882.4 | hsa-miR-182-3p | -0,16 | -0,21 |
| R3HDML    | ENST00000217043.2 | hsa-miR-182-3p | -0,16 | -0,16 |
| CTPS2     | ENST00000443824.1 | hsa-miR-182-3p | -0,16 | -0,16 |
| PFKFB3    | ENST00000536985.1 | hsa-miR-182-3p | -0,16 | -0,16 |
| VCL       | ENST00000372755.3 | hsa-miR-182-3p | -0,16 | -0,23 |
| AARS2     | ENST00000244571.4 | hsa-miR-182-3p | -0,16 | -0,16 |
| WARS2     | ENST00000369426.5 | hsa-miR-182-3p | -0,16 | -0,18 |
| PALM2     | ENST00000448454.2 | hsa-miR-182-3p | -0,16 | -0,16 |
| GNAI3     | ENST00000369851.4 | hsa-miR-182-3p | -0,16 | -0,16 |
| TDG       | ENST00000392872.3 | hsa-miR-182-3p | -0,16 | -0,16 |
| TMEM100   | ENST00000424486.2 | hsa-miR-182-3p | -0,16 | -0,16 |
| SLA2      | ENST00000262866.4 | hsa-miR-182-3p | -0,16 | -0,16 |
| ARRDC2    | ENST00000379656.3 | hsa-miR-182-3p | -0,16 | -0,16 |
| TAT       | ENST00000355962.4 | hsa-miR-182-3p | -0,16 | -0,16 |
| ZFR       | ENST00000265069.8 | hsa-miR-182-3p | -0,16 | -0,16 |
| KCNQ5     | ENST00000370398.1 | hsa-miR-182-3p | -0,16 | -0,16 |
| ZNF200    | ENST00000396868.3 | hsa-miR-182-3p | -0,16 | -0,16 |
| FAM110B   | ENST00000361488.3 | hsa-miR-182-3p | -0,16 | -0,23 |
| AIF1L     | ENST00000372300.1 | hsa-miR-182-3p | -0,16 | -0,24 |
| TMEM216   | ENST00000334888.5 | hsa-miR-182-3p | -0,16 | -0,19 |
| TSPAN3    | ENST00000267970.4 | hsa-miR-182-3p | -0,16 | -0,16 |
| TTPAL     | ENST00000372906.2 | hsa-miR-182-3p | -0,16 | -0,19 |
| TIMM23    | ENST00000260867.4 | hsa-miR-182-3p | -0,16 | -0,25 |
| RUNX1T1   | ENST00000523629.1 | hsa-miR-182-3p | -0,16 | -0,16 |
| ASRGL1    | ENST00000415229.2 | hsa-miR-182-3p | -0,16 | -0,16 |
| DAZ1      | ENST00000405239.1 | hsa-miR-182-3p | -0,16 | -0,16 |
| ARL14EP   | ENST00000282032.3 | hsa-miR-182-3p | -0,16 | -0,27 |
| RNF217    | ENST00000521654.2 | hsa-miR-182-3p | -0,16 | -0,31 |
| NUMBL     | ENST00000252891.4 | hsa-miR-182-3p | -0,16 | -0,18 |
| SNRNP200  | ENST00000323853.5 | hsa-miR-182-3p | -0,16 | -0,17 |
| RGS9      | ENST00000449996.3 | hsa-miR-182-3p | -0,16 | -0,16 |
| HORMAD2   | ENST00000336726.6 | hsa-miR-182-3p | -0,16 | -0,16 |
| GJB4      | ENST00000339480.1 | hsa-miR-182-3p | -0,16 | -0,16 |
| SMPD1     | ENST00000299397.3 | hsa-miR-182-3p | -0,16 | -0,16 |
| NUDT4     | ENST00000337179.5 | hsa-miR-182-3p | -0,16 | -0,16 |
| FAM107B   | ENST00000378470.1 | hsa-miR-182-3p | -0,16 | -0,53 |
| SLC39A14  | ENST00000381237.1 | hsa-miR-182-3p | -0,16 | -0,16 |
| PHKG1     | ENST00000452681.2 | hsa-miR-182-3p | -0,16 | -0,16 |
| BMP5      | ENST00000370830.3 | hsa-miR-182-3p | -0,16 | -0,16 |
| RAB40C    | ENST00000248139.3 | hsa-miR-182-3p | -0,16 | -0,16 |
| LHX9      | ENST00000367390.3 | hsa-miR-182-3p | -0,16 | -0,16 |
| ITGA5     | ENST00000293379.4 | hsa-miR-182-3p | -0,16 | -0,16 |
| CEACAM21  | ENST00000187608.9 | hsa-miR-182-3p | -0,16 | -0,16 |
| INSR      | ENST00000341500.5 | hsa-miR-182-3p | -0,16 | -0,18 |
| ACER3     | ENST00000532485.1 | hsa-miR-182-3p | -0,16 | -0,17 |

|            |                   |                |       |       |
|------------|-------------------|----------------|-------|-------|
| RASSF4     | ENST00000374417.2 | hsa-miR-182-3p | -0,16 | -0,46 |
| FAM161A    | ENST00000404929.1 | hsa-miR-182-3p | -0,15 | -0,15 |
| GYS2       | ENST00000261195.2 | hsa-miR-182-3p | -0,15 | -0,15 |
| RAB9B      | ENST00000243298.2 | hsa-miR-182-3p | -0,15 | -0,15 |
| TRPC3      | ENST00000264811.5 | hsa-miR-182-3p | -0,15 | -0,16 |
| KIF4B      | ENST00000435029.4 | hsa-miR-182-3p | -0,15 | -0,15 |
| TUBGCP5    | ENST00000283645.4 | hsa-miR-182-3p | -0,15 | -0,15 |
| PSTPIP1    | ENST00000558012.1 | hsa-miR-182-3p | -0,15 | -0,15 |
| ATF3       | ENST00000366983.1 | hsa-miR-182-3p | -0,15 | -0,15 |
| ZBTB34     | ENST00000319119.4 | hsa-miR-182-3p | -0,15 | -0,15 |
| ARNTL2     | ENST00000546179.1 | hsa-miR-182-3p | -0,15 | -0,16 |
| SLC46A3    | ENST00000266943.6 | hsa-miR-182-3p | -0,15 | -0,15 |
| ARHGEF3    | ENST00000296315.3 | hsa-miR-182-3p | -0,15 | -0,15 |
| CD164L2    | ENST00000374027.3 | hsa-miR-182-3p | -0,15 | -0,15 |
| AL031663.2 | ENST00000595203.1 | hsa-miR-182-3p | -0,15 | -0,15 |
| SLC22A9    | ENST00000310969.4 | hsa-miR-182-3p | -0,15 | -0,15 |
| RNF220     | ENST00000372247.2 | hsa-miR-182-3p | -0,15 | -0,15 |
| ATAD2B     | ENST00000238789.5 | hsa-miR-182-3p | -0,15 | -0,15 |
| TSPAN11    | ENST00000261177.9 | hsa-miR-182-3p | -0,15 | -0,15 |
| FCGR2A     | ENST00000271450.6 | hsa-miR-182-3p | -0,15 | -0,15 |
| PHTF2      | ENST00000416283.2 | hsa-miR-182-3p | -0,15 | -0,15 |
| WNT9A      | ENST00000272164.5 | hsa-miR-182-3p | -0,15 | -0,15 |
| GXYLT1     | ENST00000398675.3 | hsa-miR-182-3p | -0,15 | -0,15 |
| SORCS1     | ENST00000369698.1 | hsa-miR-182-3p | -0,15 | -0,2  |
| C5orf51    | ENST00000381647.2 | hsa-miR-182-3p | -0,15 | -0,15 |
| MXRA5      | ENST00000217939.6 | hsa-miR-182-3p | -0,15 | -0,15 |
| C10orf85   | ENST00000369071.2 | hsa-miR-182-3p | -0,15 | -0,15 |
| TAOK1      | ENST00000261716.3 | hsa-miR-182-3p | -0,15 | -0,16 |
| GAB3       | ENST00000369575.3 | hsa-miR-182-3p | -0,15 | -0,15 |
| WNT16      | ENST00000222462.2 | hsa-miR-182-3p | -0,15 | -0,15 |
| PLEKHG1    | ENST00000367328.1 | hsa-miR-182-3p | -0,15 | -0,16 |
| EIF4H      | ENST00000265753.8 | hsa-miR-182-3p | -0,15 | -0,15 |
| PPTC7      | ENST00000354300.3 | hsa-miR-182-3p | -0,15 | -0,15 |
| SKA3       | ENST00000314759.5 | hsa-miR-182-3p | -0,15 | -0,17 |
| DCP2       | ENST00000389063.2 | hsa-miR-182-3p | -0,15 | -0,17 |
| TADA2A     | ENST00000394395.2 | hsa-miR-182-3p | -0,15 | -0,17 |
| SETD1B     | ENST00000267197.5 | hsa-miR-182-3p | -0,15 | -0,15 |
| CARM1      | ENST00000327064.4 | hsa-miR-182-3p | -0,15 | -0,15 |
| CCR2       | ENST00000400888.2 | hsa-miR-182-3p | -0,15 | -0,15 |
| FGR        | ENST00000374005.3 | hsa-miR-182-3p | -0,15 | -0,15 |
| AADACL3    | ENST00000332530.3 | hsa-miR-182-3p | -0,15 | -0,15 |
| GCM1       | ENST00000259803.7 | hsa-miR-182-3p | -0,15 | -0,15 |
| BCL6B      | ENST00000293805.5 | hsa-miR-182-3p | -0,15 | -0,15 |
| ZNF383     | ENST00000352998.3 | hsa-miR-182-3p | -0,15 | -0,22 |
| PCDHA10    | ENST00000307360.5 | hsa-miR-182-3p | -0,15 | -0,15 |
| PCDHA2     | ENST00000526136.1 | hsa-miR-182-3p | -0,15 | -0,15 |
| PCDHA13    | ENST00000289272.2 | hsa-miR-182-3p | -0,15 | -0,15 |
| GPR55      | ENST00000392040.1 | hsa-miR-182-3p | -0,15 | -0,15 |
| PCDHA7     | ENST00000525929.1 | hsa-miR-182-3p | -0,15 | -0,15 |
| PCDHA5     | ENST00000529859.1 | hsa-miR-182-3p | -0,15 | -0,15 |
| PCDHA12    | ENST00000398631.2 | hsa-miR-182-3p | -0,15 | -0,15 |
| PCDHA6     | ENST00000529310.1 | hsa-miR-182-3p | -0,15 | -0,15 |
| PCDHA8     | ENST00000531613.1 | hsa-miR-182-3p | -0,15 | -0,15 |
| PCDHA11    | ENST00000398640.2 | hsa-miR-182-3p | -0,15 | -0,15 |
| PCDHA1     | ENST00000504120.2 | hsa-miR-182-3p | -0,15 | -0,15 |
| SCNN1A     | ENST00000360168.3 | hsa-miR-182-3p | -0,15 | -0,15 |
| PCDHAC1    | ENST00000253807.2 | hsa-miR-182-3p | -0,15 | -0,15 |
| SYNPR      | ENST00000479198.1 | hsa-miR-182-3p | -0,15 | -0,15 |
| PCDHA3     | ENST00000522353.2 | hsa-miR-182-3p | -0,15 | -0,15 |
| OR2H1      | ENST00000377136.1 | hsa-miR-182-3p | -0,15 | -0,15 |
| PCDHA4     | ENST00000530339.1 | hsa-miR-182-3p | -0,15 | -0,15 |
| TRPM1      | ENST00000397795.2 | hsa-miR-182-3p | -0,15 | -0,15 |
| PCDHA9     | ENST00000532602.1 | hsa-miR-182-3p | -0,15 | -0,15 |
| SIK2       | ENST00000304987.3 | hsa-miR-182-3p | -0,15 | -0,32 |
| CR769776.1 | ENST00000414341.2 | hsa-miR-182-3p | -0,15 | -0,15 |
| SIRPB1     | ENST00000279477.7 | hsa-miR-182-3p | -0,15 | -0,15 |

|            |                   |                |       |       |
|------------|-------------------|----------------|-------|-------|
| LPAR1      | ENST00000374431.3 | hsa-miR-182-3p | -0,15 | -0,16 |
| EMC10      | ENST00000376918.3 | hsa-miR-182-3p | -0,15 | -0,15 |
| GPD2       | ENST00000540309.1 | hsa-miR-182-3p | -0,15 | -0,15 |
| TIPRL      | ENST00000367833.2 | hsa-miR-182-3p | -0,15 | -0,18 |
| NID1       | ENST00000366595.3 | hsa-miR-182-3p | -0,15 | -0,15 |
| PLEKHM2    | ENST00000375799.3 | hsa-miR-182-3p | -0,15 | -0,15 |
| LMO4       | ENST00000370544.5 | hsa-miR-182-3p | -0,15 | -0,22 |
| IFT140     | ENST00000361339.5 | hsa-miR-182-3p | -0,15 | -0,15 |
| THUMPD1    | ENST00000381337.2 | hsa-miR-182-3p | -0,15 | -0,15 |
| CKAP2L     | ENST00000541405.1 | hsa-miR-182-3p | -0,15 | -0,18 |
| LPAR5      | ENST00000329858.4 | hsa-miR-182-3p | -0,15 | -0,15 |
| KLF7       | ENST00000423015.1 | hsa-miR-182-3p | -0,15 | -0,17 |
| RAP2B      | ENST00000323534.2 | hsa-miR-182-3p | -0,15 | -0,21 |
| MIS18A     | ENST00000290130.3 | hsa-miR-182-3p | -0,15 | -0,15 |
| CRY2       | ENST00000443527.2 | hsa-miR-182-3p | -0,15 | -0,15 |
| UBXN10     | ENST00000375099.3 | hsa-miR-182-3p | -0,15 | -0,15 |
| PRLHR      | ENST00000239032.2 | hsa-miR-182-3p | -0,15 | -0,15 |
| KMO        | ENST00000366559.4 | hsa-miR-182-3p | -0,15 | -0,15 |
| PCDHAC2    | ENST00000289269.5 | hsa-miR-182-3p | -0,15 | -0,15 |
| TRPM7      | ENST00000560955.1 | hsa-miR-182-3p | -0,15 | -0,15 |
| PRPF38A    | ENST00000257181.9 | hsa-miR-182-3p | -0,15 | -0,15 |
| EARS2      | ENST00000449606.1 | hsa-miR-182-3p | -0,15 | -0,2  |
| NUTF2      | ENST00000219169.4 | hsa-miR-182-3p | -0,15 | -0,27 |
| TNPO1      | ENST00000337273.5 | hsa-miR-182-3p | -0,15 | -0,17 |
| FAM163A    | ENST00000341785.4 | hsa-miR-182-3p | -0,15 | -0,15 |
| ADAMDEC1   | ENST00000256412.4 | hsa-miR-182-3p | -0,15 | -0,15 |
| PACRGL     | ENST00000502374.1 | hsa-miR-182-3p | -0,15 | -0,19 |
| USP31      | ENST00000219689.7 | hsa-miR-182-3p | -0,15 | -0,18 |
| AMER2      | ENST00000357816.2 | hsa-miR-182-3p | -0,15 | -0,17 |
| ACSF3      | ENST00000317447.4 | hsa-miR-182-3p | -0,15 | -0,16 |
| EDNRA      | ENST00000339690.5 | hsa-miR-182-3p | -0,15 | -0,15 |
| TDRP       | ENST00000324079.6 | hsa-miR-182-3p | -0,15 | -0,23 |
| TMEM55B    | ENST00000250489.4 | hsa-miR-182-3p | -0,15 | -0,15 |
| TGM5       | ENST00000220420.5 | hsa-miR-182-3p | -0,15 | -0,15 |
| VTI1A      | ENST00000393077.2 | hsa-miR-182-3p | -0,15 | -0,18 |
| PCDHGA11   | ENST00000398587.2 | hsa-miR-182-3p | -0,15 | -0,15 |
| AGXT2      | ENST00000231420.6 | hsa-miR-182-3p | -0,15 | -0,16 |
| HERC4      | ENST00000277817.6 | hsa-miR-182-3p | -0,15 | -0,15 |
| MMACHC     | ENST00000401061.4 | hsa-miR-182-3p | -0,15 | -0,39 |
| ZSCAN4     | ENST00000318203.5 | hsa-miR-182-3p | -0,15 | -0,26 |
| KCNH5      | ENST00000322893.7 | hsa-miR-182-3p | -0,15 | -0,2  |
| PSKH1      | ENST00000291041.5 | hsa-miR-182-3p | -0,15 | -0,15 |
| SRPK2      | ENST00000393651.3 | hsa-miR-182-3p | -0,15 | -0,31 |
| AK7        | ENST00000267584.4 | hsa-miR-182-3p | -0,14 | -0,14 |
| EGFLAM     | ENST00000322350.5 | hsa-miR-182-3p | -0,14 | -0,21 |
| PER2       | ENST00000254658.3 | hsa-miR-182-3p | -0,14 | -0,14 |
| MFAP3L     | ENST00000393704.3 | hsa-miR-182-3p | -0,14 | -0,15 |
| AGK        | ENST00000355413.4 | hsa-miR-182-3p | -0,14 | -0,15 |
| FERMT1     | ENST00000217289.4 | hsa-miR-182-3p | -0,14 | -0,16 |
| GDAP2      | ENST00000369443.5 | hsa-miR-182-3p | -0,14 | -0,24 |
| CTSO       | ENST00000433477.3 | hsa-miR-182-3p | -0,14 | -0,2  |
| NAP1L5     | ENST00000323061.5 | hsa-miR-182-3p | -0,14 | -0,2  |
| PXN        | ENST00000458477.2 | hsa-miR-182-3p | -0,14 | -0,14 |
| ANKHD1     | ENST00000360839.2 | hsa-miR-182-3p | -0,14 | -0,14 |
| LPL        | ENST00000311322.8 | hsa-miR-182-3p | -0,14 | -0,14 |
| PI15       | ENST00000260113.2 | hsa-miR-182-3p | -0,14 | -0,14 |
| SNCAIP     | ENST00000261368.8 | hsa-miR-182-3p | -0,14 | -0,14 |
| PLD1       | ENST00000342215.6 | hsa-miR-182-3p | -0,14 | -0,14 |
| MSS51      | ENST00000299432.2 | hsa-miR-182-3p | -0,14 | -0,14 |
| TGFBR2     | ENST00000359013.4 | hsa-miR-182-3p | -0,14 | -0,16 |
| EHD4       | ENST00000220325.4 | hsa-miR-182-3p | -0,14 | -0,29 |
| CYP7B1     | ENST00000310193.3 | hsa-miR-182-3p | -0,14 | -0,16 |
| KIFC3      | ENST00000465878.2 | hsa-miR-182-3p | -0,14 | -0,14 |
| AL391421.1 | ENST00000372387.1 | hsa-miR-182-3p | -0,14 | -0,14 |
| AC145676.2 | ENST00000514988.1 | hsa-miR-182-3p | -0,14 | -0,14 |
| TAF5L      | ENST00000366676.1 | hsa-miR-182-3p | -0,14 | -0,14 |



|                  |                   |                |       |       |
|------------------|-------------------|----------------|-------|-------|
| AL645730.2       | ENST00000448346.1 | hsa-miR-182-3p | -0,14 | -0,14 |
| SLMAP            | ENST00000295951.3 | hsa-miR-182-3p | -0,14 | -0,14 |
| DUOX1            | ENST00000321429.4 | hsa-miR-182-3p | -0,14 | -0,14 |
| TBL1X            | ENST00000407597.2 | hsa-miR-182-3p | -0,14 | -0,22 |
| VPS26B           | ENST00000281187.5 | hsa-miR-182-3p | -0,14 | -0,15 |
| MEF2A            | ENST00000354410.5 | hsa-miR-182-3p | -0,14 | -0,15 |
| TOR1AIP2         | ENST00000367612.3 | hsa-miR-182-3p | -0,14 | -0,18 |
| GNB4             | ENST00000232564.3 | hsa-miR-182-3p | -0,14 | -0,15 |
| LDB3             | ENST00000542786.1 | hsa-miR-182-3p | -0,14 | -0,14 |
| GRK5             | ENST00000392870.2 | hsa-miR-182-3p | -0,14 | -0,14 |
| RPS6KA1          | ENST00000374168.2 | hsa-miR-182-3p | -0,14 | -0,14 |
| SLAMF8           | ENST00000289707.5 | hsa-miR-182-3p | -0,14 | -0,14 |
| CASKIN2          | ENST00000321617.3 | hsa-miR-182-3p | -0,14 | -0,14 |
| TMEM139          | ENST00000359333.3 | hsa-miR-182-3p | -0,14 | -0,14 |
| PTGFR            | ENST00000370756.3 | hsa-miR-182-3p | -0,14 | -0,14 |
| ASXL2            | ENST00000435504.4 | hsa-miR-182-3p | -0,14 | -0,18 |
| NPPC             | ENST00000409852.1 | hsa-miR-182-3p | -0,14 | -0,14 |
| WDR31            | ENST00000341761.4 | hsa-miR-182-3p | -0,14 | -0,14 |
| STIM2            | ENST00000467011.1 | hsa-miR-182-3p | -0,14 | -0,14 |
| KIF4A            | ENST00000374403.3 | hsa-miR-182-3p | -0,14 | -0,14 |
| TEX22            | ENST00000451127.2 | hsa-miR-182-3p | -0,14 | -0,14 |
| DSG4             | ENST00000359747.4 | hsa-miR-182-3p | -0,14 | -0,14 |
| MANEA            | ENST00000358812.4 | hsa-miR-182-3p | -0,14 | -0,16 |
| FBXL20           | ENST00000394294.3 | hsa-miR-182-3p | -0,14 | -0,34 |
| RAPGEF4          | ENST00000409036.1 | hsa-miR-182-3p | -0,14 | -0,15 |
| SH3D19           | ENST00000409598.4 | hsa-miR-182-3p | -0,14 | -0,2  |
| MAX              | ENST00000284165.6 | hsa-miR-182-3p | -0,14 | -0,14 |
| ARHGEF37         | ENST00000333677.6 | hsa-miR-182-3p | -0,14 | -0,14 |
| GGA3             | ENST00000351904.7 | hsa-miR-182-3p | -0,14 | -0,14 |
| C11orf82         | ENST00000528759.1 | hsa-miR-182-3p | -0,14 | -0,14 |
| UBAP1            | ENST00000545103.1 | hsa-miR-182-3p | -0,14 | -0,14 |
| AKAP5            | ENST00000394718.4 | hsa-miR-182-3p | -0,14 | -0,14 |
| FAM210A          | ENST00000322247.3 | hsa-miR-182-3p | -0,14 | -0,14 |
| UBA2             | ENST00000246548.4 | hsa-miR-182-3p | -0,14 | -0,14 |
| SYT9             | ENST00000318881.6 | hsa-miR-182-3p | -0,14 | -0,14 |
| SHISA9           | ENST00000558583.1 | hsa-miR-182-3p | -0,14 | -0,14 |
| CD4              | ENST00000011653.4 | hsa-miR-182-3p | -0,14 | -0,14 |
| NCEH1            | ENST00000475381.1 | hsa-miR-182-3p | -0,14 | -0,14 |
| GAL3ST3          | ENST00000312006.4 | hsa-miR-182-3p | -0,14 | -0,24 |
| XXbac-BPG32J3.20 | ENST00000461287.1 | hsa-miR-182-3p | -0,14 | -0,14 |
| PCDHGA4          | ENST00000571252.1 | hsa-miR-182-3p | -0,14 | -0,14 |
| PCDHGB3          | ENST00000576222.1 | hsa-miR-182-3p | -0,14 | -0,14 |
| HERC5            | ENST00000264350.3 | hsa-miR-182-3p | -0,14 | -0,14 |
| PCDHGB1          | ENST00000523390.1 | hsa-miR-182-3p | -0,14 | -0,14 |
| PCDHGB2          | ENST00000522605.1 | hsa-miR-182-3p | -0,14 | -0,14 |
| ZNF384           | ENST00000319770.3 | hsa-miR-182-3p | -0,14 | -0,14 |
| PCDHGA1          | ENST00000517417.1 | hsa-miR-182-3p | -0,14 | -0,14 |
| PCDHGB4          | ENST00000519479.1 | hsa-miR-182-3p | -0,14 | -0,14 |
| ORAOV1           | ENST00000279147.4 | hsa-miR-182-3p | -0,14 | -0,14 |
| PCDHGB6          | ENST00000520790.1 | hsa-miR-182-3p | -0,14 | -0,14 |
| PCDHGB7          | ENST00000398594.2 | hsa-miR-182-3p | -0,14 | -0,14 |
| PCDHGA5          | ENST00000518069.1 | hsa-miR-182-3p | -0,14 | -0,14 |
| ZBTB7A           | ENST00000322357.4 | hsa-miR-182-3p | -0,14 | -0,19 |
| ATL2             | ENST00000406122.1 | hsa-miR-182-3p | -0,14 | -0,14 |
| SCRN3            | ENST00000272732.6 | hsa-miR-182-3p | -0,14 | -0,17 |
| PCDHGA8          | ENST00000398604.2 | hsa-miR-182-3p | -0,14 | -0,14 |
| PCDHGA7          | ENST00000518325.1 | hsa-miR-182-3p | -0,14 | -0,14 |
| PCDHGA9          | ENST00000573521.1 | hsa-miR-182-3p | -0,14 | -0,14 |
| PCDHGA6          | ENST00000517434.1 | hsa-miR-182-3p | -0,14 | -0,14 |
| PCDHGA3          | ENST00000253812.6 | hsa-miR-182-3p | -0,14 | -0,14 |
| DPH1             | ENST00000263083.6 | hsa-miR-182-3p | -0,14 | -0,14 |
| PABPC1L2A        | ENST00000373519.1 | hsa-miR-182-3p | -0,14 | -0,14 |
| PCDHGA2          | ENST00000394576.2 | hsa-miR-182-3p | -0,14 | -0,14 |
| SMAD7            | ENST00000262158.2 | hsa-miR-182-3p | -0,14 | -0,14 |
| MLC1             | ENST00000395876.2 | hsa-miR-182-3p | -0,14 | -0,14 |
| PCDHGA12         | ENST00000252085.3 | hsa-miR-182-3p | -0,14 | -0,14 |

|              |                   |                |       |       |
|--------------|-------------------|----------------|-------|-------|
| PCDHGC3      | ENST00000308177.3 | hsa-miR-182-3p | -0,14 | -0,14 |
| EPB41L1      | ENST00000441639.1 | hsa-miR-182-3p | -0,14 | -0,23 |
| ZFYVE21      | ENST00000216602.6 | hsa-miR-182-3p | -0,14 | -0,14 |
| EPOR         | ENST00000592375.2 | hsa-miR-182-3p | -0,14 | -0,14 |
| PCDHGC5      | ENST00000252087.1 | hsa-miR-182-3p | -0,14 | -0,14 |
| SASH1        | ENST00000367467.3 | hsa-miR-182-3p | -0,14 | -0,14 |
| PCDHGA10     | ENST00000398610.2 | hsa-miR-182-3p | -0,14 | -0,14 |
| PCDHGC4      | ENST00000306593.1 | hsa-miR-182-3p | -0,14 | -0,14 |
| RIN2         | ENST00000255006.6 | hsa-miR-182-3p | -0,14 | -0,17 |
| PAPD5        | ENST00000357464.3 | hsa-miR-182-3p | -0,14 | -0,14 |
| KLHDC10      | ENST00000335420.5 | hsa-miR-182-3p | -0,14 | -0,16 |
| CCR9         | ENST00000357632.2 | hsa-miR-182-3p | -0,14 | -0,14 |
| SLC23A2      | ENST00000338244.1 | hsa-miR-182-3p | -0,14 | -0,14 |
| NRXN1        | ENST00000342183.5 | hsa-miR-182-3p | -0,14 | -0,14 |
| PCYT1B       | ENST00000379145.1 | hsa-miR-182-3p | -0,14 | -0,14 |
| PAX7         | ENST00000420770.2 | hsa-miR-182-3p | -0,14 | -0,14 |
| GBP6         | ENST00000370456.4 | hsa-miR-182-3p | -0,14 | -0,14 |
| GDI2         | ENST00000380191.4 | hsa-miR-182-3p | -0,13 | -0,16 |
| PANK4        | ENST00000378466.3 | hsa-miR-182-3p | -0,13 | -0,16 |
| LHPP         | ENST00000368839.1 | hsa-miR-182-3p | -0,13 | -0,14 |
| SGCD         | ENST00000435422.3 | hsa-miR-182-3p | -0,13 | -0,17 |
| TAB2         | ENST00000367456.1 | hsa-miR-182-3p | -0,13 | -0,13 |
| TRPM4        | ENST00000252826.5 | hsa-miR-182-3p | -0,13 | -0,13 |
| NTRK3        | ENST00000394480.2 | hsa-miR-182-3p | -0,13 | -0,13 |
| RNPC3        | ENST00000533099.1 | hsa-miR-182-3p | -0,13 | -0,13 |
| SPC24        | ENST00000592540.1 | hsa-miR-182-3p | -0,13 | -0,15 |
| ZNHIT6       | ENST00000431532.2 | hsa-miR-182-3p | -0,13 | -0,38 |
| MTFR1        | ENST00000458689.2 | hsa-miR-182-3p | -0,13 | -0,14 |
| TRIM45       | ENST00000256649.4 | hsa-miR-182-3p | -0,13 | -0,2  |
| FAM47E-STBD1 | ENST00000237642.6 | hsa-miR-182-3p | -0,13 | -0,17 |
| ACSL4        | ENST00000469796.2 | hsa-miR-182-3p | -0,13 | -0,13 |
| AL020996.1   | ENST00000536896.1 | hsa-miR-182-3p | -0,13 | -0,13 |
| VIPAS39      | ENST00000343765.2 | hsa-miR-182-3p | -0,13 | -0,13 |
| C10orf118    | ENST00000543782.1 | hsa-miR-182-3p | -0,13 | -0,14 |
| NAT16        | ENST00000300303.2 | hsa-miR-182-3p | -0,13 | -0,13 |
| SEPT14       | ENST00000388975.3 | hsa-miR-182-3p | -0,13 | -0,13 |
| COX6B2       | ENST00000590900.1 | hsa-miR-182-3p | -0,13 | -0,13 |
| PHLDB1       | ENST00000361417.2 | hsa-miR-182-3p | -0,13 | -0,17 |
| ENTPD4       | ENST00000358689.4 | hsa-miR-182-3p | -0,13 | -0,18 |
| HIST1H3G     | ENST00000305910.3 | hsa-miR-182-3p | -0,13 | -0,24 |
| GMFB         | ENST00000554908.1 | hsa-miR-182-3p | -0,13 | -0,43 |
| ZNF775       | ENST00000329630.5 | hsa-miR-182-3p | -0,13 | -0,13 |
| CLNK         | ENST00000226951.6 | hsa-miR-182-3p | -0,13 | -0,13 |
| ZFP36L1      | ENST00000555997.1 | hsa-miR-182-3p | -0,13 | -0,13 |
| ILDR2        | ENST00000469934.2 | hsa-miR-182-3p | -0,13 | -0,13 |
| SLC34A2      | ENST00000382051.3 | hsa-miR-182-3p | -0,13 | -0,13 |
| USP26        | ENST00000370832.1 | hsa-miR-182-3p | -0,13 | -0,13 |
| KIAA0753     | ENST00000361413.3 | hsa-miR-182-3p | -0,13 | -0,13 |
| MRPS2        | ENST00000371785.1 | hsa-miR-182-3p | -0,13 | -0,13 |
| PIK3C2A      | ENST00000265970.7 | hsa-miR-182-3p | -0,13 | -0,17 |
| ZNF554       | ENST00000317243.5 | hsa-miR-182-3p | -0,13 | -0,17 |
| MCM10        | ENST00000378694.1 | hsa-miR-182-3p | -0,13 | -0,21 |
| NUP98        | ENST00000359171.4 | hsa-miR-182-3p | -0,13 | -0,17 |
| RANBP6       | ENST00000259569.5 | hsa-miR-182-3p | -0,13 | -0,14 |
| FOXA2        | ENST00000419308.2 | hsa-miR-182-3p | -0,13 | -0,13 |
| HOXC11       | ENST00000546378.1 | hsa-miR-182-3p | -0,13 | -0,13 |
| LYPD6        | ENST00000334166.4 | hsa-miR-182-3p | -0,13 | -0,13 |
| TRIM2        | ENST00000338700.5 | hsa-miR-182-3p | -0,13 | -0,13 |
| NFIB         | ENST00000397575.3 | hsa-miR-182-3p | -0,13 | -0,14 |
| ENPP4        | ENST00000321037.4 | hsa-miR-182-3p | -0,13 | -0,14 |
| C12orf66     | ENST00000544871.1 | hsa-miR-182-3p | -0,13 | -0,2  |
| KIF5A        | ENST00000455537.2 | hsa-miR-182-3p | -0,13 | -0,13 |
| CSTF3        | ENST00000323959.4 | hsa-miR-182-3p | -0,13 | -0,13 |
| XKR6         | ENST00000304437.2 | hsa-miR-182-3p | -0,13 | -0,13 |
| FOXO1        | ENST00000379561.5 | hsa-miR-182-3p | -0,13 | -0,13 |
| ZNF517       | ENST00000359971.3 | hsa-miR-182-3p | -0,13 | -0,13 |

|                |                   |                |       |       |
|----------------|-------------------|----------------|-------|-------|
| ZNF654         | ENST00000309495.5 | hsa-miR-182-3p | -0,13 | -0,13 |
| PRR11          | ENST00000262293.4 | hsa-miR-182-3p | -0,13 | -0,13 |
| FGF23          | ENST00000237837.1 | hsa-miR-182-3p | -0,13 | -0,13 |
| ARHGAP19-SLIT1 | ENST00000453547.2 | hsa-miR-182-3p | -0,13 | -0,13 |
| GALNT11        | ENST00000430044.2 | hsa-miR-182-3p | -0,13 | -0,13 |
| MAF            | ENST00000393350.1 | hsa-miR-182-3p | -0,13 | -0,14 |
| TBC1D9B        | ENST00000519746.1 | hsa-miR-182-3p | -0,13 | -0,13 |
| SDC1           | ENST00000254351.4 | hsa-miR-182-3p | -0,13 | -0,13 |
| SLC25A34       | ENST00000294454.5 | hsa-miR-182-3p | -0,13 | -0,13 |
| SSH1           | ENST00000360239.3 | hsa-miR-182-3p | -0,13 | -0,13 |
| B3GALNT2       | ENST00000366600.3 | hsa-miR-182-3p | -0,13 | -0,13 |
| PCDH11Y        | ENST00000215473.6 | hsa-miR-182-3p | -0,13 | -0,13 |
| SLC30A7        | ENST00000370112.4 | hsa-miR-182-3p | -0,13 | -0,26 |
| ITPRIPL1       | ENST00000536814.1 | hsa-miR-182-3p | -0,13 | -0,13 |
| FAM8A1         | ENST00000259963.3 | hsa-miR-182-3p | -0,13 | -0,13 |
| TMEM43         | ENST00000306077.4 | hsa-miR-182-3p | -0,13 | -0,14 |
| OPHN1          | ENST00000355520.5 | hsa-miR-182-3p | -0,13 | -0,13 |
| CBFA2T3        | ENST00000327483.5 | hsa-miR-182-3p | -0,13 | -0,13 |
| VPS8           | ENST00000287546.4 | hsa-miR-182-3p | -0,13 | -0,13 |
| MIER3          | ENST00000381226.3 | hsa-miR-182-3p | -0,13 | -0,13 |
| CLDN16         | ENST00000264734.2 | hsa-miR-182-3p | -0,13 | -0,13 |
| KCNJ9          | ENST00000368088.3 | hsa-miR-182-3p | -0,13 | -0,13 |
| XIRP2          | ENST00000409195.1 | hsa-miR-182-3p | -0,13 | -0,13 |
| DAZAP1         | ENST00000336761.6 | hsa-miR-182-3p | -0,13 | -0,13 |
| VRTN           | ENST00000256362.4 | hsa-miR-182-3p | -0,13 | -0,13 |
| ITFG3          | ENST00000399932.3 | hsa-miR-182-3p | -0,13 | -0,13 |
| ZNF597         | ENST00000301744.4 | hsa-miR-182-3p | -0,13 | -0,15 |
| UBE2G1         | ENST00000396981.2 | hsa-miR-182-3p | -0,13 | -0,15 |
| ZNF362         | ENST00000539719.1 | hsa-miR-182-3p | -0,13 | -0,14 |
| TCTA           | ENST00000273590.3 | hsa-miR-182-3p | -0,13 | -0,15 |
| GLCC1          | ENST00000223145.5 | hsa-miR-182-3p | -0,13 | -0,13 |
| POTEG          | ENST00000409832.3 | hsa-miR-182-3p | -0,13 | -0,13 |
| ZNF582         | ENST00000301310.4 | hsa-miR-182-3p | -0,13 | -0,13 |
| GABRA4         | ENST00000264318.3 | hsa-miR-182-3p | -0,13 | -0,13 |
| POTEM          | ENST00000551509.1 | hsa-miR-182-3p | -0,13 | -0,13 |
| SRP72          | ENST00000342756.5 | hsa-miR-182-3p | -0,13 | -0,19 |
| MBP            | ENST00000397863.1 | hsa-miR-182-3p | -0,13 | -0,15 |
| TSKU           | ENST00000333090.4 | hsa-miR-182-3p | -0,13 | -0,21 |
| GRAP2          | ENST00000344138.4 | hsa-miR-182-3p | -0,13 | -0,16 |
| SF3B3          | ENST00000302516.5 | hsa-miR-182-3p | -0,13 | -0,17 |
| ARHGAP20       | ENST00000260283.4 | hsa-miR-182-3p | -0,13 | -0,21 |
| DNAJB12        | ENST00000338820.3 | hsa-miR-182-3p | -0,13 | -0,13 |
| TMEM213        | ENST00000442682.2 | hsa-miR-182-3p | -0,13 | -0,13 |
| MUC13          | ENST00000311075.3 | hsa-miR-182-3p | -0,13 | -0,21 |
| PTPN4          | ENST00000263708.2 | hsa-miR-182-3p | -0,13 | -0,25 |
| TBCEL          | ENST00000422003.2 | hsa-miR-182-3p | -0,13 | -0,14 |
| ZNF787         | ENST00000270459.3 | hsa-miR-182-3p | -0,12 | -0,12 |
| NIPAL4         | ENST00000311946.7 | hsa-miR-182-3p | -0,12 | -0,12 |
| UBE2D4         | ENST00000222402.3 | hsa-miR-182-3p | -0,12 | -0,12 |
| TRIM15         | ENST00000376694.4 | hsa-miR-182-3p | -0,12 | -0,12 |
| NAA15          | ENST00000296543.5 | hsa-miR-182-3p | -0,12 | -0,12 |
| SALL2          | ENST00000327430.3 | hsa-miR-182-3p | -0,12 | -0,12 |
| CASP14         | ENST00000427043.3 | hsa-miR-182-3p | -0,12 | -0,12 |
| NRK            | ENST00000243300.9 | hsa-miR-182-3p | -0,12 | -0,12 |
| RAB22A         | ENST00000244040.3 | hsa-miR-182-3p | -0,12 | -0,22 |
| NRIP1          | ENST00000400199.1 | hsa-miR-182-3p | -0,12 | -0,13 |
| ACSL1          | ENST00000454703.2 | hsa-miR-182-3p | -0,12 | -0,14 |
| KCNMB3         | ENST00000497599.1 | hsa-miR-182-3p | -0,12 | -0,36 |
| ARHGEF7        | ENST00000426073.2 | hsa-miR-182-3p | -0,12 | -0,13 |
| CMTM6          | ENST00000205636.3 | hsa-miR-182-3p | -0,12 | -0,21 |
| NBPF14         | ENST00000369219.1 | hsa-miR-182-3p | -0,12 | -0,12 |
| SLC25A25       | ENST00000373069.5 | hsa-miR-182-3p | -0,12 | -0,12 |
| CXCL5          | ENST00000296027.4 | hsa-miR-182-3p | -0,12 | -0,12 |
| WDFY1          | ENST00000233055.4 | hsa-miR-182-3p | -0,12 | -0,12 |
| ZNF532         | ENST00000336078.4 | hsa-miR-182-3p | -0,12 | -0,12 |
| SYP            | ENST00000263233.4 | hsa-miR-182-3p | -0,12 | -0,12 |

|           |                   |                |       |       |
|-----------|-------------------|----------------|-------|-------|
| FAM219B   | ENST00000357635.5 | hsa-miR-182-3p | -0,12 | -0,16 |
| POMGNT1   | ENST00000396420.3 | hsa-miR-182-3p | -0,12 | -0,12 |
| OTUD3     | ENST00000375120.3 | hsa-miR-182-3p | -0,12 | -0,13 |
| GATAD2A   | ENST00000360315.3 | hsa-miR-182-3p | -0,12 | -0,12 |
| MYLK      | ENST00000360772.3 | hsa-miR-182-3p | -0,12 | -0,12 |
| STON2     | ENST00000267540.2 | hsa-miR-182-3p | -0,12 | -0,17 |
| BCL2      | ENST00000398117.1 | hsa-miR-182-3p | -0,12 | -0,14 |
| ETV6      | ENST00000396373.4 | hsa-miR-182-3p | -0,12 | -0,14 |
| CDC42SE1  | ENST00000439374.2 | hsa-miR-182-3p | -0,12 | -0,15 |
| MARVELD1  | ENST00000285605.6 | hsa-miR-182-3p | -0,12 | -0,12 |
| SCD5      | ENST00000319540.4 | hsa-miR-182-3p | -0,12 | -0,12 |
| PURB      | ENST00000395699.2 | hsa-miR-182-3p | -0,12 | -0,12 |
| SERPINA11 | ENST00000334708.3 | hsa-miR-182-3p | -0,12 | -0,12 |
| GPAM      | ENST00000348367.4 | hsa-miR-182-3p | -0,12 | -0,13 |
| CREM      | ENST00000333809.8 | hsa-miR-182-3p | -0,12 | -0,42 |
| ACACA     | ENST00000353139.5 | hsa-miR-182-3p | -0,12 | -0,16 |
| CLIP4     | ENST00000320081.5 | hsa-miR-182-3p | -0,12 | -0,14 |
| PHKA1     | ENST00000373542.4 | hsa-miR-182-3p | -0,12 | -0,17 |
| ST3GAL5   | ENST00000393808.3 | hsa-miR-182-3p | -0,12 | -0,12 |
| FAM154B   | ENST00000339465.5 | hsa-miR-182-3p | -0,12 | -0,12 |
| ZNF672    | ENST00000306562.3 | hsa-miR-182-3p | -0,12 | -0,12 |
| IGFN1     | ENST00000295591.8 | hsa-miR-182-3p | -0,12 | -0,12 |
| LPGAT1    | ENST00000366997.4 | hsa-miR-182-3p | -0,12 | -0,12 |
| CCDC107   | ENST00000421582.2 | hsa-miR-182-3p | -0,12 | -0,12 |
| ZBTB40    | ENST00000404138.1 | hsa-miR-182-3p | -0,12 | -0,12 |
| DIO2      | ENST00000438257.4 | hsa-miR-182-3p | -0,12 | -0,16 |
| TRIM67    | ENST00000444294.3 | hsa-miR-182-3p | -0,12 | -0,13 |
| TEFM      | ENST00000580840.1 | hsa-miR-182-3p | -0,12 | -0,13 |
| ZMAT3     | ENST00000311417.2 | hsa-miR-182-3p | -0,12 | -0,17 |
| RAB5A     | ENST00000273047.4 | hsa-miR-182-3p | -0,12 | -0,3  |
| DKC1      | ENST00000369550.5 | hsa-miR-182-3p | -0,12 | -0,12 |
| ADRA2B    | ENST00000409345.3 | hsa-miR-182-3p | -0,12 | -0,12 |
| RASEF     | ENST00000376447.3 | hsa-miR-182-3p | -0,12 | -0,12 |
| ZC3H13    | ENST00000242848.4 | hsa-miR-182-3p | -0,12 | -0,12 |
| MAGI3     | ENST00000307546.9 | hsa-miR-182-3p | -0,12 | -0,12 |
| NARFL     | ENST00000251588.2 | hsa-miR-182-3p | -0,12 | -0,12 |
| SHPRH     | ENST00000367505.2 | hsa-miR-182-3p | -0,12 | -0,12 |
| HS6ST3    | ENST00000376705.2 | hsa-miR-182-3p | -0,12 | -0,12 |
| STK4      | ENST00000372801.1 | hsa-miR-182-3p | -0,12 | -0,18 |
| GRPEL1    | ENST00000264954.4 | hsa-miR-182-3p | -0,12 | -0,35 |
| PPP1R3B   | ENST00000310455.3 | hsa-miR-182-3p | -0,12 | -0,2  |
| C1orf189  | ENST00000368525.3 | hsa-miR-182-3p | -0,12 | -0,3  |
| GFI1      | ENST00000370332.1 | hsa-miR-182-3p | -0,12 | -0,18 |
| GMPS      | ENST00000496455.2 | hsa-miR-182-3p | -0,12 | -0,13 |
| CXorf36   | ENST00000398000.2 | hsa-miR-182-3p | -0,12 | -0,12 |
| MPZ       | ENST00000533357.1 | hsa-miR-182-3p | -0,12 | -0,12 |
| ZBTB22    | ENST00000418724.1 | hsa-miR-182-3p | -0,12 | -0,12 |
| SHOX2     | ENST00000490689.2 | hsa-miR-182-3p | -0,12 | -0,12 |
| MACC1     | ENST00000400331.5 | hsa-miR-182-3p | -0,12 | -0,12 |
| STARD4    | ENST00000512160.1 | hsa-miR-182-3p | -0,12 | -0,16 |
| MTMR7     | ENST00000180173.5 | hsa-miR-182-3p | -0,12 | -0,16 |
| ARSD      | ENST00000381154.1 | hsa-miR-182-3p | -0,12 | -0,13 |
| CYB5D1    | ENST00000571846.1 | hsa-miR-182-3p | -0,12 | -0,14 |
| CPEB1     | ENST00000450751.2 | hsa-miR-182-3p | -0,12 | -0,12 |
| MAP1LC3B  | ENST00000268607.5 | hsa-miR-182-3p | -0,12 | -0,12 |
| WNK1      | ENST00000315939.6 | hsa-miR-182-3p | -0,12 | -0,15 |
| PABPC1L2B | ENST00000373521.2 | hsa-miR-182-3p | -0,12 | -0,12 |
| MMP16     | ENST00000286614.6 | hsa-miR-182-3p | -0,12 | -0,12 |
| RASA4B    | ENST00000541662.1 | hsa-miR-182-3p | -0,12 | -0,12 |
| JAG1      | ENST00000254958.5 | hsa-miR-182-3p | -0,12 | -0,12 |
| INPP5E    | ENST00000371712.3 | hsa-miR-182-3p | -0,12 | -0,12 |
| CCDC3     | ENST00000378825.3 | hsa-miR-182-3p | -0,12 | -0,12 |
| TMEM65    | ENST00000297632.6 | hsa-miR-182-3p | -0,12 | -0,33 |
| KLF3      | ENST00000261438.5 | hsa-miR-182-3p | -0,12 | -0,18 |
| RPL23     | ENST00000479035.2 | hsa-miR-182-3p | -0,12 | -0,17 |
| RRP7A     | ENST00000323013.6 | hsa-miR-182-3p | -0,12 | -0,14 |

|              |                    |                |       |       |
|--------------|--------------------|----------------|-------|-------|
| KLHL40       | ENST00000287777.4  | hsa-miR-182-3p | -0,12 | -0,12 |
| VAMP1        | ENST00000361716.3  | hsa-miR-182-3p | -0,12 | -0,12 |
| C15orf53     | ENST00000318792.1  | hsa-miR-182-3p | -0,12 | -0,12 |
| EYA3         | ENST00000373871.3  | hsa-miR-182-3p | -0,12 | -0,12 |
| ZNF746       | ENST00000340622.3  | hsa-miR-182-3p | -0,12 | -0,12 |
| CCR5         | ENST00000292303.4  | hsa-miR-182-3p | -0,12 | -0,12 |
| DCT          | ENST00000377028.5  | hsa-miR-182-3p | -0,12 | -0,12 |
| SLC39A7      | ENST00000374675.3  | hsa-miR-182-3p | -0,12 | -0,12 |
| GOT2         | ENST00000245206.5  | hsa-miR-182-3p | -0,12 | -0,16 |
| TMEM170B     | ENST00000379426.1  | hsa-miR-182-3p | -0,12 | -0,16 |
| GPHN         | ENST00000478722.1  | hsa-miR-182-3p | -0,12 | -0,12 |
| CATSPER4     | ENST00000456354.2  | hsa-miR-182-3p | -0,12 | -0,12 |
| IRG1         | ENST00000377462.1  | hsa-miR-182-3p | -0,12 | -0,12 |
| LHX1         | ENST00000254457.5  | hsa-miR-182-3p | -0,12 | -0,12 |
| THAP11       | ENST00000303596.1  | hsa-miR-182-3p | -0,12 | -0,12 |
| ACSL6        | ENST00000379264.2  | hsa-miR-182-3p | -0,12 | -0,15 |
| DDA1         | ENST00000359866.4  | hsa-miR-182-3p | -0,12 | -0,13 |
| MMP19        | ENST00000409200.3  | hsa-miR-182-3p | -0,12 | -0,12 |
| HLA-DPB1     | ENST00000418931.2  | hsa-miR-182-3p | -0,12 | -0,18 |
| RAD51L3-RFFL | ENST00000593039.1  | hsa-miR-182-3p | -0,12 | -0,14 |
| DNMT3B       | ENST00000344505.4  | hsa-miR-182-3p | -0,12 | -0,12 |
| ANKRD23      | ENST00000318357.4  | hsa-miR-182-3p | -0,12 | -0,12 |
| ZSCAN12      | ENST00000361028.1  | hsa-miR-182-3p | -0,12 | -0,12 |
| E2F4         | ENST00000379378.3  | hsa-miR-182-3p | -0,12 | -0,12 |
| KLHL23       | ENST00000392647.2  | hsa-miR-182-3p | -0,12 | -0,14 |
| EPHB2        | ENST00000374632.3  | hsa-miR-182-3p | -0,12 | -0,12 |
| F2RL1        | ENST00000296677.4  | hsa-miR-182-3p | -0,12 | -0,12 |
| RDX          | ENST00000343115.4  | hsa-miR-182-3p | -0,12 | -0,12 |
| FAM199X      | ENST00000493442.1  | hsa-miR-182-3p | -0,11 | -0,12 |
| PEX19        | ENST00000368072.5  | hsa-miR-182-3p | -0,11 | -0,11 |
| PLEKHG7      | ENST00000344636.3  | hsa-miR-182-3p | -0,11 | -0,11 |
| ESRRG        | ENST00000361525.3  | hsa-miR-182-3p | -0,11 | -0,11 |
| NBPF10       | ENST00000369339.3  | hsa-miR-182-3p | -0,11 | -0,11 |
| KRAS         | ENST00000256078.4  | hsa-miR-182-3p | -0,11 | -0,33 |
| PHF17        | ENST00000226319.6  | hsa-miR-182-3p | -0,11 | -0,11 |
| SYNE1        | ENST00000367255.5  | hsa-miR-182-3p | -0,11 | -0,11 |
| MYH9         | ENST00000216181.5  | hsa-miR-182-3p | -0,11 | -0,14 |
| FAM47E       | ENST00000515604.1  | hsa-miR-182-3p | -0,11 | -0,14 |
| CCNF         | ENST00000397066.4  | hsa-miR-182-3p | -0,11 | -0,12 |
| GTPBP1       | ENST00000216044.5  | hsa-miR-182-3p | -0,11 | -0,12 |
| RFWD3        | ENST00000361070.4  | hsa-miR-182-3p | -0,11 | -0,15 |
| FKBP5        | ENST00000536438.1  | hsa-miR-182-3p | -0,11 | -0,2  |
| SH3BP4       | ENST00000392011.2  | hsa-miR-182-3p | -0,11 | -0,11 |
| NCOA2        | ENST00000452400.2  | hsa-miR-182-3p | -0,11 | -0,11 |
| CAMKK2       | ENST00000538733.1  | hsa-miR-182-3p | -0,11 | -0,12 |
| NBPF3        | ENST00000318220.6  | hsa-miR-182-3p | -0,11 | -0,11 |
| KPNA6        | ENST00000373625.3  | hsa-miR-182-3p | -0,11 | -0,13 |
| PLA2G2D      | ENST00000375105.3  | hsa-miR-182-3p | -0,11 | -0,11 |
| NBPF16       | ENST00000417839.1  | hsa-miR-182-3p | -0,11 | -0,11 |
| NBPF15       | ENST00000442702.2  | hsa-miR-182-3p | -0,11 | -0,11 |
| SFRP1        | ENST00000220772.3  | hsa-miR-182-3p | -0,11 | -0,25 |
| DESI2        | ENST00000302550.11 | hsa-miR-182-3p | -0,11 | -0,11 |
| MTR          | ENST00000366577.5  | hsa-miR-182-3p | -0,11 | -0,13 |
| XXYLT1       | ENST00000310380.6  | hsa-miR-182-3p | -0,11 | -0,11 |
| INADL        | ENST00000371158.2  | hsa-miR-182-3p | -0,11 | -0,11 |
| NAA30        | ENST00000556492.1  | hsa-miR-182-3p | -0,11 | -0,27 |
| ASB16        | ENST00000293414.1  | hsa-miR-182-3p | -0,11 | -0,11 |
| GPR124       | ENST00000315215.7  | hsa-miR-182-3p | -0,11 | -0,11 |
| ROBO1        | ENST00000436010.2  | hsa-miR-182-3p | -0,11 | -0,11 |
| PNPLA8       | ENST00000426128.2  | hsa-miR-182-3p | -0,11 | -0,21 |
| COL25A1      | ENST00000399132.1  | hsa-miR-182-3p | -0,11 | -0,12 |
| BLOC1S6      | ENST00000220531.3  | hsa-miR-182-3p | -0,11 | -0,11 |
| EMR2         | ENST00000315576.3  | hsa-miR-182-3p | -0,11 | -0,25 |
| CHIT1        | ENST00000367229.1  | hsa-miR-182-3p | -0,11 | -0,11 |
| SCLY         | ENST00000254663.6  | hsa-miR-182-3p | -0,11 | -0,11 |
| EVX2         | ENST00000308618.4  | hsa-miR-182-3p | -0,11 | -0,11 |

|           |                   |                |       |       |
|-----------|-------------------|----------------|-------|-------|
| CS        | ENST00000548567.1 | hsa-miR-182-3p | -0,11 | -0,11 |
| C15orf54  | ENST00000318578.3 | hsa-miR-182-3p | -0,11 | -0,11 |
| DGKB      | ENST00000403951.2 | hsa-miR-182-3p | -0,11 | -0,11 |
| CHRM5     | ENST00000383263.5 | hsa-miR-182-3p | -0,11 | -0,11 |
| ADAMTS18  | ENST00000282849.5 | hsa-miR-182-3p | -0,11 | -0,11 |
| KLF9      | ENST00000377126.2 | hsa-miR-182-3p | -0,11 | -0,17 |
| FKBP14    | ENST00000222803.5 | hsa-miR-182-3p | -0,11 | -0,12 |
| GPR126    | ENST00000230173.6 | hsa-miR-182-3p | -0,11 | -0,11 |
| ELL2      | ENST00000237853.4 | hsa-miR-182-3p | -0,11 | -0,12 |
| TSPAN14   | ENST00000429989.3 | hsa-miR-182-3p | -0,11 | -0,15 |
| PREPL     | ENST00000541738.1 | hsa-miR-182-3p | -0,11 | -0,14 |
| ANO3      | ENST00000256737.3 | hsa-miR-182-3p | -0,11 | -0,11 |
| ATP13A1   | ENST00000291503.5 | hsa-miR-182-3p | -0,11 | -0,11 |
| RBM12     | ENST00000374114.3 | hsa-miR-182-3p | -0,11 | -0,11 |
| ZNF142    | ENST00000449707.1 | hsa-miR-182-3p | -0,11 | -0,11 |
| ATP13A3   | ENST00000439040.1 | hsa-miR-182-3p | -0,11 | -0,11 |
| ARMC1     | ENST00000276569.3 | hsa-miR-182-3p | -0,11 | -0,13 |
| TIMM8B    | ENST00000504148.2 | hsa-miR-182-3p | -0,11 | -0,27 |
| NOTCH2    | ENST00000256646.2 | hsa-miR-182-3p | -0,11 | -0,12 |
| LRRC2     | ENST00000395905.3 | hsa-miR-182-3p | -0,11 | -0,11 |
| ZNF491    | ENST00000323169.5 | hsa-miR-182-3p | -0,11 | -0,11 |
| CREBZF    | ENST00000398294.2 | hsa-miR-182-3p | -0,11 | -0,24 |
| CPNE3     | ENST00000198765.4 | hsa-miR-182-3p | -0,11 | -0,11 |
| LILRA1    | ENST00000453777.1 | hsa-miR-182-3p | -0,11 | -0,11 |
| MTERF     | ENST00000419292.1 | hsa-miR-182-3p | -0,11 | -0,11 |
| FSD2      | ENST00000334574.8 | hsa-miR-182-3p | -0,11 | -0,11 |
| PRUNE     | ENST00000271620.3 | hsa-miR-182-3p | -0,11 | -0,11 |
| FCRL1     | ENST00000368176.3 | hsa-miR-182-3p | -0,11 | -0,11 |
| PRICKLE3  | ENST00000376317.3 | hsa-miR-182-3p | -0,11 | -0,31 |
| NANOS2    | ENST00000341294.2 | hsa-miR-182-3p | -0,11 | -0,11 |
| NBPF9     | ENST00000440491.2 | hsa-miR-182-3p | -0,11 | -0,11 |
| PRDM14    | ENST00000276594.2 | hsa-miR-182-3p | -0,11 | -0,11 |
| PHLPP2    | ENST00000568954.1 | hsa-miR-182-3p | -0,11 | -0,11 |
| XIRP1     | ENST00000396251.1 | hsa-miR-182-3p | -0,11 | -0,11 |
| KLHL42    | ENST00000381271.2 | hsa-miR-182-3p | -0,11 | -0,11 |
| UBN1      | ENST00000262376.6 | hsa-miR-182-3p | -0,11 | -0,11 |
| ARHGAP28  | ENST00000419673.2 | hsa-miR-182-3p | -0,11 | -0,15 |
| TTC9      | ENST00000256367.2 | hsa-miR-182-3p | -0,11 | -0,13 |
| C16orf52  | ENST00000542527.2 | hsa-miR-182-3p | -0,11 | -0,14 |
| FBXW11    | ENST00000296933.6 | hsa-miR-182-3p | -0,11 | -0,11 |
| KIAA0586  | ENST00000423743.3 | hsa-miR-182-3p | -0,11 | -0,17 |
| CALU      | ENST00000535011.2 | hsa-miR-182-3p | -0,11 | -0,17 |
| MBD1      | ENST00000591416.1 | hsa-miR-182-3p | -0,11 | -0,12 |
| H6PD      | ENST00000377403.2 | hsa-miR-182-3p | -0,11 | -0,11 |
| UNC5D     | ENST00000287272.2 | hsa-miR-182-3p | -0,11 | -0,13 |
| HIST1H2BD | ENST00000289316.2 | hsa-miR-182-3p | -0,11 | -0,26 |
| NEK1      | ENST00000439128.2 | hsa-miR-182-3p | -0,11 | -0,11 |
| SLCO4C1   | ENST00000310954.6 | hsa-miR-182-3p | -0,11 | -0,11 |
| NOS1AP    | ENST00000361897.5 | hsa-miR-182-3p | -0,11 | -0,11 |
| HLTF      | ENST00000465259.1 | hsa-miR-182-3p | -0,11 | -0,11 |
| PPP3R2    | ENST00000374806.1 | hsa-miR-182-3p | -0,11 | -0,11 |
| SERINC3   | ENST00000342374.4 | hsa-miR-182-3p | -0,11 | -0,16 |
| SDE2      | ENST00000272091.7 | hsa-miR-182-3p | -0,11 | -0,13 |
| KIAA1737  | ENST00000361786.2 | hsa-miR-182-3p | -0,11 | -0,12 |
| PPFIA2    | ENST00000549396.1 | hsa-miR-182-3p | -0,11 | -0,11 |
| ACVR1C    | ENST00000243349.8 | hsa-miR-182-3p | -0,11 | -0,11 |
| UBE2QL1   | ENST00000399816.3 | hsa-miR-182-3p | -0,11 | -0,23 |
| SEMA6D    | ENST00000355997.3 | hsa-miR-182-3p | -0,11 | -0,11 |
| DOK6      | ENST00000382713.5 | hsa-miR-182-3p | -0,11 | -0,11 |
| TMPRSS3   | ENST00000398405.1 | hsa-miR-182-3p | -0,11 | -0,11 |
| FAM115C   | ENST00000441159.2 | hsa-miR-182-3p | -0,11 | -0,11 |
| PAX8      | ENST00000263335.7 | hsa-miR-182-3p | -0,11 | -0,11 |
| S1PR2     | ENST00000590320.1 | hsa-miR-182-3p | -0,11 | -0,11 |
| FOXP1     | ENST00000318789.4 | hsa-miR-182-3p | -0,11 | -0,19 |
| ATPAF1    | ENST00000576409.1 | hsa-miR-182-3p | -0,11 | -0,12 |
| ARL5B     | ENST00000377275.3 | hsa-miR-182-3p | -0,11 | -0,28 |

|            |                   |                |       |       |
|------------|-------------------|----------------|-------|-------|
| ORAI2      | ENST00000356387.2 | hsa-miR-182-3p | -0,11 | -0,14 |
| EPGN       | ENST00000413830.1 | hsa-miR-182-3p | -0,11 | -0,25 |
| DHRS12     | ENST00000218981.1 | hsa-miR-182-3p | -0,1  | -0,1  |
| RASGRF1    | ENST00000558480.2 | hsa-miR-182-3p | -0,1  | -0,1  |
| SMPD3      | ENST00000219334.5 | hsa-miR-182-3p | -0,1  | -0,1  |
| PTGER3     | ENST00000370924.4 | hsa-miR-182-3p | -0,1  | -0,1  |
| PLEKHA8    | ENST00000449726.1 | hsa-miR-182-3p | -0,1  | -0,11 |
| ZNF449     | ENST00000339249.4 | hsa-miR-182-3p | -0,1  | -0,11 |
| BCAT1      | ENST00000261192.7 | hsa-miR-182-3p | -0,1  | -0,11 |
| RAB30      | ENST00000533486.1 | hsa-miR-182-3p | -0,1  | -0,16 |
| PAX2       | ENST00000370296.2 | hsa-miR-182-3p | -0,1  | -0,1  |
| OTUD5      | ENST00000156084.4 | hsa-miR-182-3p | -0,1  | -0,1  |
| STXBP5L    | ENST00000273666.6 | hsa-miR-182-3p | -0,1  | -0,1  |
| PAK7       | ENST00000378423.1 | hsa-miR-182-3p | -0,1  | -0,1  |
| TAF1       | ENST00000373790.4 | hsa-miR-182-3p | -0,1  | -0,1  |
| UNC119B    | ENST00000344651.4 | hsa-miR-182-3p | -0,1  | -0,1  |
| KIF1B      | ENST00000377086.1 | hsa-miR-182-3p | -0,1  | -0,1  |
| CEBPE      | ENST00000206513.5 | hsa-miR-182-3p | -0,1  | -0,1  |
| HIF1AN     | ENST00000299163.6 | hsa-miR-182-3p | -0,1  | -0,16 |
| ETNK2      | ENST00000367201.3 | hsa-miR-182-3p | -0,1  | -0,1  |
| ZNF592     | ENST00000299927.3 | hsa-miR-182-3p | -0,1  | -0,12 |
| ARHGAP17   | ENST00000441763.2 | hsa-miR-182-3p | -0,1  | -0,1  |
| POLR3F     | ENST00000377603.4 | hsa-miR-182-3p | -0,1  | -0,12 |
| TRAK2      | ENST00000332624.3 | hsa-miR-182-3p | -0,1  | -0,16 |
| RAD54B     | ENST00000297592.5 | hsa-miR-182-3p | -0,1  | -0,13 |
| UBE3C      | ENST00000348165.5 | hsa-miR-182-3p | -0,1  | -0,1  |
| ATP10D     | ENST00000273859.3 | hsa-miR-182-3p | -0,1  | -0,1  |
| B3GNT6     | ENST00000533140.1 | hsa-miR-182-3p | -0,1  | -0,1  |
| EREG       | ENST00000244869.2 | hsa-miR-182-3p | -0,1  | -0,1  |
| IL6R       | ENST00000344086.4 | hsa-miR-182-3p | -0,1  | -0,11 |
| UBXN2A     | ENST00000309033.4 | hsa-miR-182-3p | -0,1  | -0,14 |
| SLC41A1    | ENST00000367137.3 | hsa-miR-182-3p | -0,1  | -0,1  |
| NARG2      | ENST00000261520.4 | hsa-miR-182-3p | -0,1  | -0,16 |
| NLRP10     | ENST00000328600.2 | hsa-miR-182-3p | -0,1  | -0,14 |
| MYO5A      | ENST00000399231.3 | hsa-miR-182-3p | -0,1  | -0,12 |
| ADAM19     | ENST00000257527.4 | hsa-miR-182-3p | -0,1  | -0,1  |
| SIAH3      | ENST00000400405.2 | hsa-miR-182-3p | -0,1  | -0,1  |
| PPP2R2D    | ENST00000422256.2 | hsa-miR-182-3p | -0,1  | -0,18 |
| FLVCR2     | ENST00000238667.4 | hsa-miR-182-3p | -0,1  | -0,1  |
| ENPEP      | ENST00000265162.5 | hsa-miR-182-3p | -0,1  | -0,16 |
| MTSS1      | ENST00000378017.3 | hsa-miR-182-3p | -0,1  | -0,2  |
| MOCS3      | ENST00000244051.1 | hsa-miR-182-3p | -0,1  | -0,11 |
| NMNAT2     | ENST00000294868.4 | hsa-miR-182-3p | -0,1  | -0,1  |
| TNFAIP3    | ENST00000237289.4 | hsa-miR-182-3p | -0,1  | -0,1  |
| RBPJ       | ENST00000504907.1 | hsa-miR-182-3p | -0,1  | -0,1  |
| AC079210.1 | ENST00000600820.1 | hsa-miR-182-3p | -0,1  | -0,1  |
| CNST       | ENST00000366513.4 | hsa-miR-182-3p | -0,1  | -0,1  |
| KLF12      | ENST00000377669.2 | hsa-miR-182-3p | -0,1  | -0,11 |
| KPNB1      | ENST00000290158.4 | hsa-miR-182-3p | -0,1  | -0,2  |
| LIX1L      | ENST00000369308.3 | hsa-miR-182-3p | -0,1  | -0,12 |
| METTL8     | ENST00000375258.4 | hsa-miR-182-3p | -0,1  | -0,16 |
| CA12       | ENST00000178638.3 | hsa-miR-182-3p | -0,1  | -0,23 |
| AGPAT4     | ENST00000366911.5 | hsa-miR-182-3p | -0,1  | -0,19 |
| HOXB9      | ENST00000311177.5 | hsa-miR-182-3p | -0,1  | -0,17 |
| TPP2       | ENST00000376052.3 | hsa-miR-182-3p | -0,1  | -0,18 |
| TMEM194A   | ENST00000379391.3 | hsa-miR-182-3p | -0,1  | -0,11 |
| ANAPC10    | ENST00000507656.1 | hsa-miR-182-3p | -0,1  | -0,2  |
| NBPF1      | ENST00000430580.2 | hsa-miR-182-3p | -0,1  | -0,1  |
| SLC5A1     | ENST00000266088.4 | hsa-miR-182-3p | -0,1  | -0,1  |
| ARL14EPL   | ENST00000601302.2 | hsa-miR-182-3p | -0,1  | -0,21 |
| PCSK5      | ENST00000376752.4 | hsa-miR-182-3p | -0,1  | -0,1  |
| DCHS1      | ENST00000299441.3 | hsa-miR-182-3p | -0,1  | -0,1  |
| MAK16      | ENST00000360128.6 | hsa-miR-182-3p | -0,1  | -0,13 |
| TATDN3     | ENST00000526997.1 | hsa-miR-182-3p | -0,1  | -0,38 |
| P4HB       | ENST00000331483.4 | hsa-miR-182-3p | -0,1  | -0,1  |
| WDR37      | ENST00000358220.1 | hsa-miR-182-3p | -0,1  | -0,18 |

|           |                   |                |       |       |
|-----------|-------------------|----------------|-------|-------|
| C10orf105 | ENST00000441508.2 | hsa-miR-182-3p | -0,1  | -0,1  |
| PEX5L     | ENST00000467460.1 | hsa-miR-182-3p | -0,1  | -0,1  |
| NBPF12    | ENST00000446760.2 | hsa-miR-182-3p | -0,1  | -0,1  |
| ENDOD1    | ENST00000278505.4 | hsa-miR-182-3p | -0,1  | -0,2  |
| WNT8B     | ENST00000343737.5 | hsa-miR-182-3p | -0,1  | -0,12 |
| BMPR1A    | ENST00000372037.3 | hsa-miR-182-3p | -0,1  | -0,28 |
| ALOX15B   | ENST00000380183.4 | hsa-miR-182-3p | -0,1  | -0,1  |
| CYP19A1   | ENST00000396402.1 | hsa-miR-182-3p | -0,1  | -0,1  |
| KCNJ16    | ENST00000589377.1 | hsa-miR-182-3p | -0,1  | -0,1  |
| SHROOM4   | ENST00000376020.2 | hsa-miR-182-3p | -0,1  | -0,1  |
| SNRK      | ENST00000429705.2 | hsa-miR-182-3p | -0,1  | -0,1  |
| FAM124A   | ENST00000322475.8 | hsa-miR-182-3p | -0,1  | -0,1  |
| E2F3      | ENST00000346618.3 | hsa-miR-182-3p | -0,1  | -0,1  |
| NBPF11    | ENST00000604938.1 | hsa-miR-182-3p | -0,1  | -0,1  |
| PTCD1     | ENST00000292478.4 | hsa-miR-182-3p | -0,1  | -0,11 |
| GNPDA1    | ENST00000311337.6 | hsa-miR-182-3p | -0,1  | -0,1  |
| YPEL1     | ENST00000339468.3 | hsa-miR-182-3p | -0,1  | -0,18 |
| GPATCH2L  | ENST00000553588.1 | hsa-miR-182-3p | -0,1  | -0,11 |
| B3GNT4    | ENST00000546192.1 | hsa-miR-182-3p | -0,1  | -0,12 |
| FAM86A    | ENST00000458008.4 | hsa-miR-182-3p | -0,1  | -0,1  |
| TIGIT     | ENST00000486257.1 | hsa-miR-182-3p | -0,1  | -0,1  |
| KLHL29    | ENST00000486442.1 | hsa-miR-182-3p | -0,1  | -0,1  |
| RIMBP3C   | ENST00000331505.5 | hsa-miR-182-3p | -0,1  | -0,1  |
| HS3ST1    | ENST00000002596.5 | hsa-miR-182-3p | -0,1  | -0,18 |
| CD96      | ENST00000352690.4 | hsa-miR-182-3p | -0,1  | -0,1  |
| ZNF831    | ENST00000371030.2 | hsa-miR-182-3p | -0,1  | -0,1  |
| FAM161B   | ENST00000286544.3 | hsa-miR-182-3p | -0,1  | -0,1  |
| ZNF525    | ENST00000467003.1 | hsa-miR-182-3p | -0,1  | -0,1  |
| SOCS2     | ENST00000548537.1 | hsa-miR-182-3p | -0,1  | -0,1  |
| TMEM239   | ENST00000361033.1 | hsa-miR-182-3p | -0,1  | -0,1  |
| LDLRAD4   | ENST00000399848.3 | hsa-miR-182-3p | -0,1  | -0,17 |
| PRLR      | ENST00000342362.5 | hsa-miR-182-3p | -0,1  | -0,14 |
| MID2      | ENST00000262843.6 | hsa-miR-182-3p | -0,1  | -0,12 |
| CTNNA3    | ENST00000433211.2 | hsa-miR-182-3p | -0,1  | -0,1  |
| CACHD1    | ENST00000371073.2 | hsa-miR-182-3p | -0,1  | -0,1  |
| ALDH1A3   | ENST00000329841.5 | hsa-miR-182-3p | -0,1  | -0,1  |
| MRPL3     | ENST00000264995.3 | hsa-miR-182-3p | -0,1  | -0,31 |
| FUT1      | ENST00000310160.3 | hsa-miR-182-3p | -0,1  | -0,1  |
| KLHL15    | ENST00000328046.8 | hsa-miR-182-3p | -0,1  | -0,2  |
| ZRANB1    | ENST00000359653.4 | hsa-miR-182-3p | -0,1  | -0,1  |
| SLC25A44  | ENST00000359511.4 | hsa-miR-182-3p | -0,1  | -0,1  |
| FOXN3     | ENST00000345097.4 | hsa-miR-182-3p | -0,1  | -0,2  |
| DENR      | ENST00000280557.6 | hsa-miR-182-3p | -0,1  | -0,14 |
| DAP       | ENST00000230895.6 | hsa-miR-182-3p | -0,1  | -0,38 |
| SORBS3    | ENST00000240123.7 | hsa-miR-182-3p | -0,1  | -0,1  |
| POT1      | ENST00000451531.2 | hsa-miR-182-3p | -0,1  | -0,1  |
| NIN       | ENST00000389868.3 | hsa-miR-182-3p | -0,1  | -0,1  |
| DNAJC16   | ENST00000375847.3 | hsa-miR-182-3p | -0,1  | -0,1  |
| GDF7      | ENST00000272224.3 | hsa-miR-182-3p | -0,1  | -0,1  |
| ERBB2IP   | ENST00000284037.5 | hsa-miR-182-3p | -0,1  | -0,14 |
| KCNA7     | ENST00000221444.1 | hsa-miR-182-3p | -0,1  | -0,1  |
| SLK       | ENST00000335753.4 | hsa-miR-182-3p | -0,09 | -0,14 |
| ARHGEF12  | ENST00000397843.2 | hsa-miR-182-3p | -0,09 | -0,11 |
| C6orf141  | ENST00000529246.2 | hsa-miR-182-3p | -0,09 | -0,15 |
| MDH1B     | ENST00000374412.3 | hsa-miR-182-3p | -0,09 | -0,25 |
| NAV2      | ENST00000360655.4 | hsa-miR-182-3p | -0,09 | -0,1  |
| RPS9      | ENST00000441429.1 | hsa-miR-182-3p | -0,09 | -0,09 |
| TSHZ1     | ENST00000322038.5 | hsa-miR-182-3p | -0,09 | -0,09 |
| SEC14L5   | ENST00000251170.7 | hsa-miR-182-3p | -0,09 | -0,09 |
| KCNS2     | ENST00000287042.4 | hsa-miR-182-3p | -0,09 | -0,09 |
| CNTN5     | ENST00000524871.1 | hsa-miR-182-3p | -0,09 | -0,09 |
| MRV11     | ENST00000421747.1 | hsa-miR-182-3p | -0,09 | -0,14 |
| PLCXD1    | ENST00000381657.2 | hsa-miR-182-3p | -0,09 | -0,09 |
| KANSL3    | ENST00000431828.1 | hsa-miR-182-3p | -0,09 | -0,09 |
| TRIM5     | ENST00000396847.3 | hsa-miR-182-3p | -0,09 | -0,09 |
| KLLN      | ENST00000445946.3 | hsa-miR-182-3p | -0,09 | -0,09 |



|              |                   |                |       |       |
|--------------|-------------------|----------------|-------|-------|
| RFFL         | ENST00000315249.7 | hsa-miR-182-3p | -0,09 | -0,11 |
| DCP1A        | ENST00000607628.1 | hsa-miR-182-3p | -0,09 | -0,11 |
| SCD          | ENST00000370355.2 | hsa-miR-182-3p | -0,09 | -0,09 |
| XRN1         | ENST00000264951.4 | hsa-miR-182-3p | -0,09 | -0,09 |
| PMEPA1       | ENST00000341744.3 | hsa-miR-182-3p | -0,09 | -0,16 |
| PERP         | ENST00000421351.3 | hsa-miR-182-3p | -0,09 | -0,37 |
| SLC16A7      | ENST00000261187.4 | hsa-miR-182-3p | -0,09 | -0,28 |
| FRRS1L       | ENST00000561981.2 | hsa-miR-182-3p | -0,09 | -0,09 |
| FSTL1        | ENST00000295633.3 | hsa-miR-182-3p | -0,09 | -0,1  |
| SH3BP5L      | ENST00000366472.5 | hsa-miR-182-3p | -0,09 | -0,09 |
| C1orf204     | ENST00000368102.1 | hsa-miR-182-3p | -0,09 | -0,09 |
| SMOC2        | ENST00000356284.2 | hsa-miR-182-3p | -0,09 | -0,09 |
| KIF2A        | ENST00000381103.2 | hsa-miR-182-3p | -0,09 | -0,32 |
| C9orf40      | ENST00000376854.5 | hsa-miR-182-3p | -0,09 | -0,13 |
| ZBED3        | ENST00000255198.2 | hsa-miR-182-3p | -0,09 | -0,24 |
| TPMT         | ENST00000309983.4 | hsa-miR-182-3p | -0,09 | -0,13 |
| SRPK1        | ENST00000373825.2 | hsa-miR-182-3p | -0,09 | -0,61 |
| WDR36        | ENST00000506538.2 | hsa-miR-182-3p | -0,09 | -0,13 |
| RAB41        | ENST00000374473.2 | hsa-miR-182-3p | -0,09 | -1    |
| LMAN1        | ENST00000251047.5 | hsa-miR-182-3p | -0,09 | -0,11 |
| AK4          | ENST00000545314.1 | hsa-miR-182-3p | -0,09 | -0,09 |
| MYOM3        | ENST00000338909.5 | hsa-miR-182-3p | -0,09 | -0,09 |
| RCVRN        | ENST00000226193.5 | hsa-miR-182-3p | -0,09 | -0,09 |
| ABCG1        | ENST00000398457.2 | hsa-miR-182-3p | -0,09 | -0,09 |
| TRPV1        | ENST00000399759.3 | hsa-miR-182-3p | -0,09 | -0,09 |
| ADAMTSL1     | ENST00000380548.4 | hsa-miR-182-3p | -0,09 | -0,12 |
| POLG         | ENST00000268124.5 | hsa-miR-182-3p | -0,09 | -0,09 |
| SEC62        | ENST00000337002.4 | hsa-miR-182-3p | -0,09 | -0,32 |
| CCDC81       | ENST00000528728.1 | hsa-miR-182-3p | -0,09 | -0,09 |
| TRIM23       | ENST00000231524.9 | hsa-miR-182-3p | -0,09 | -0,09 |
| SHPK         | ENST00000572705.1 | hsa-miR-182-3p | -0,09 | -0,09 |
| ATP5J2-PTCD1 | ENST00000413834.1 | hsa-miR-182-3p | -0,09 | -0,14 |
| MIEF1        | ENST00000325301.2 | hsa-miR-182-3p | -0,09 | -0,12 |
| LMBR1        | ENST00000353442.5 | hsa-miR-182-3p | -0,09 | -0,14 |
| PSEN2        | ENST00000340188.4 | hsa-miR-182-3p | -0,09 | -0,09 |
| AGL          | ENST00000370161.2 | hsa-miR-182-3p | -0,09 | -0,09 |
| CLSTN3       | ENST00000266546.6 | hsa-miR-182-3p | -0,09 | -0,09 |
| BRPF3        | ENST00000534400.1 | hsa-miR-182-3p | -0,09 | -0,09 |
| DLC1         | ENST00000276297.4 | hsa-miR-182-3p | -0,09 | -0,12 |
| C4orf3       | ENST00000399075.4 | hsa-miR-182-3p | -0,09 | -0,14 |
| C1RL         | ENST00000544702.1 | hsa-miR-182-3p | -0,09 | -0,12 |
| YRDC         | ENST00000373044.2 | hsa-miR-182-3p | -0,09 | -0,22 |
| C14orf132    | ENST00000555004.1 | hsa-miR-182-3p | -0,09 | -0,22 |
| ZCWPW2       | ENST00000383768.2 | hsa-miR-182-3p | -0,09 | -0,19 |
| MKL2         | ENST00000318282.5 | hsa-miR-182-3p | -0,09 | -0,09 |
| LRCH1        | ENST00000311191.6 | hsa-miR-182-3p | -0,09 | -0,09 |
| ABCC10       | ENST00000372530.4 | hsa-miR-182-3p | -0,09 | -0,09 |
| CDHR1        | ENST00000372117.3 | hsa-miR-182-3p | -0,09 | -0,09 |
| RASD2        | ENST00000216127.4 | hsa-miR-182-3p | -0,09 | -0,09 |
| PRMT8        | ENST00000382622.3 | hsa-miR-182-3p | -0,09 | -0,09 |
| ERGIC1       | ENST00000393784.3 | hsa-miR-182-3p | -0,09 | -0,09 |
| CIT          | ENST00000392521.2 | hsa-miR-182-3p | -0,09 | -0,1  |
| ONECUT2      | ENST00000491143.2 | hsa-miR-182-3p | -0,09 | -0,09 |
| C5orf47      | ENST00000340147.6 | hsa-miR-182-3p | -0,09 | -0,29 |
| LAMP2        | ENST00000371335.4 | hsa-miR-182-3p | -0,09 | -0,09 |
| MYH15        | ENST00000273353.3 | hsa-miR-182-3p | -0,09 | -0,09 |
| TAP1         | ENST00000354258.4 | hsa-miR-182-3p | -0,09 | -0,09 |
| C10orf53     | ENST00000374112.3 | hsa-miR-182-3p | -0,09 | -0,09 |
| NHSL2        | ENST00000540800.1 | hsa-miR-182-3p | -0,09 | -0,09 |
| ZNF646       | ENST00000394979.2 | hsa-miR-182-3p | -0,09 | -0,09 |
| C17orf105    | ENST00000449302.3 | hsa-miR-182-3p | -0,09 | -0,09 |
| EMILIN3      | ENST00000332312.3 | hsa-miR-182-3p | -0,09 | -0,09 |
| OVOL1        | ENST00000335987.3 | hsa-miR-182-3p | -0,09 | -0,09 |
| CCNJ         | ENST00000265992.5 | hsa-miR-182-3p | -0,09 | -0,09 |
| COL14A1      | ENST00000297848.3 | hsa-miR-182-3p | -0,09 | -0,11 |
| NACC2        | ENST00000371753.1 | hsa-miR-182-3p | -0,09 | -0,13 |

|             |                   |                |       |       |
|-------------|-------------------|----------------|-------|-------|
| CHST11      | ENST00000549260.1 | hsa-miR-182-3p | -0,09 | -0,1  |
| ZNF641      | ENST00000301042.3 | hsa-miR-182-3p | -0,09 | -0,16 |
| FGF11       | ENST00000293829.4 | hsa-miR-182-3p | -0,09 | -0,17 |
| RBM48       | ENST00000481551.1 | hsa-miR-182-3p | -0,09 | -0,28 |
| TCF20       | ENST00000359486.3 | hsa-miR-182-3p | -0,09 | -0,09 |
| KCTD9       | ENST00000221200.4 | hsa-miR-182-3p | -0,09 | -0,09 |
| LCP2        | ENST00000046794.5 | hsa-miR-182-3p | -0,09 | -0,09 |
| RAB3B       | ENST00000371655.3 | hsa-miR-182-3p | -0,09 | -0,11 |
| FSBP        | ENST00000481490.2 | hsa-miR-182-3p | -0,09 | -0,11 |
| ZZEF1       | ENST00000381638.2 | hsa-miR-182-3p | -0,09 | -0,1  |
| SEZ6L       | ENST00000360929.3 | hsa-miR-182-3p | -0,09 | -0,09 |
| SLC6A8      | ENST00000253122.5 | hsa-miR-182-3p | -0,09 | -0,09 |
| KIF5C       | ENST00000435030.1 | hsa-miR-182-3p | -0,09 | -0,09 |
| FGD6        | ENST00000343958.4 | hsa-miR-182-3p | -0,09 | -0,12 |
| PSD3        | ENST00000327040.8 | hsa-miR-182-3p | -0,09 | -0,1  |
| UBE2K       | ENST00000261427.5 | hsa-miR-182-3p | -0,09 | -0,32 |
| CASP2       | ENST00000310447.5 | hsa-miR-182-3p | -0,09 | -0,09 |
| FAM168A     | ENST00000064778.4 | hsa-miR-182-3p | -0,09 | -0,09 |
| SAMD4A      | ENST00000392067.3 | hsa-miR-182-3p | -0,09 | -0,1  |
| FBLN7       | ENST00000331203.2 | hsa-miR-182-3p | -0,09 | -0,23 |
| SEC61A1     | ENST00000243253.3 | hsa-miR-182-3p | -0,09 | -0,09 |
| HMBOX1      | ENST00000397358.3 | hsa-miR-182-3p | -0,09 | -0,09 |
| CDHR5       | ENST00000397542.2 | hsa-miR-182-3p | -0,09 | -0,09 |
| TMEM215     | ENST00000342743.5 | hsa-miR-182-3p | -0,09 | -0,09 |
| HELLS       | ENST00000394036.1 | hsa-miR-182-3p | -0,09 | -0,32 |
| POLR3D      | ENST00000397802.4 | hsa-miR-182-3p | -0,09 | -0,09 |
| LYN         | ENST00000520220.2 | hsa-miR-182-3p | -0,09 | -0,2  |
| DPH2        | ENST00000255108.3 | hsa-miR-182-3p | -0,09 | -0,15 |
| KPNA4       | ENST00000334256.4 | hsa-miR-182-3p | -0,09 | -0,12 |
| SPARC       | ENST00000231061.4 | hsa-miR-182-3p | -0,09 | -0,09 |
| CLTC        | ENST00000269122.3 | hsa-miR-182-3p | -0,09 | -0,34 |
| ZNF609      | ENST00000326648.3 | hsa-miR-182-3p | -0,09 | -0,09 |
| PCSK1       | ENST00000311106.3 | hsa-miR-182-3p | -0,09 | -0,2  |
| CCDC12      | ENST00000425441.1 | hsa-miR-182-3p | -0,09 | -0,09 |
| CD28        | ENST00000324106.8 | hsa-miR-182-3p | -0,09 | -0,09 |
| LANCL3      | ENST00000378621.3 | hsa-miR-182-3p | -0,08 | -0,27 |
| GAREML      | ENST00000401533.2 | hsa-miR-182-3p | -0,08 | -0,09 |
| DNAJC18     | ENST00000302060.5 | hsa-miR-182-3p | -0,08 | -0,31 |
| DIXDC1      | ENST00000440460.2 | hsa-miR-182-3p | -0,08 | -0,15 |
| RPE         | ENST00000429907.1 | hsa-miR-182-3p | -0,08 | -0,09 |
| ENTPD5      | ENST00000334696.6 | hsa-miR-182-3p | -0,08 | -0,09 |
| FZD8        | ENST00000374694.1 | hsa-miR-182-3p | -0,08 | -0,21 |
| AGTR2       | ENST00000371906.4 | hsa-miR-182-3p | -0,08 | -0,08 |
| GPR176      | ENST00000299092.3 | hsa-miR-182-3p | -0,08 | -0,08 |
| RNASEL      | ENST00000367559.3 | hsa-miR-182-3p | -0,08 | -0,08 |
| AGXT        | ENST00000307503.3 | hsa-miR-182-3p | -0,08 | -0,08 |
| FGF5        | ENST00000456523.3 | hsa-miR-182-3p | -0,08 | -0,38 |
| NFYA        | ENST00000341376.6 | hsa-miR-182-3p | -0,08 | -0,12 |
| ZNF462      | ENST00000277225.5 | hsa-miR-182-3p | -0,08 | -0,1  |
| MYOCD       | ENST00000425538.1 | hsa-miR-182-3p | -0,08 | -0,12 |
| SMAD3       | ENST00000327367.4 | hsa-miR-182-3p | -0,08 | -0,11 |
| CACNA1D     | ENST00000288139.4 | hsa-miR-182-3p | -0,08 | -0,18 |
| TECPR2      | ENST00000359520.7 | hsa-miR-182-3p | -0,08 | -0,08 |
| RNF44       | ENST00000274811.4 | hsa-miR-182-3p | -0,08 | -0,08 |
| ZNF638      | ENST00000355812.3 | hsa-miR-182-3p | -0,08 | -0,08 |
| GABBR2      | ENST00000259455.2 | hsa-miR-182-3p | -0,08 | -0,08 |
| KLHL18      | ENST00000232766.5 | hsa-miR-182-3p | -0,08 | -0,08 |
| AC002472.13 | ENST00000543388.1 | hsa-miR-182-3p | -0,08 | -0,08 |
| MOCS2       | ENST00000450852.3 | hsa-miR-182-3p | -0,08 | -0,39 |
| DGKE        | ENST00000284061.3 | hsa-miR-182-3p | -0,08 | -0,11 |
| NME6        | ENST00000450160.1 | hsa-miR-182-3p | -0,08 | -0,34 |
| CLIC5       | ENST00000339561.6 | hsa-miR-182-3p | -0,08 | -0,11 |
| WBP1L       | ENST00000369889.4 | hsa-miR-182-3p | -0,08 | -0,08 |
| GABRG1      | ENST00000295452.4 | hsa-miR-182-3p | -0,08 | -0,08 |
| TAF1D       | ENST00000448108.2 | hsa-miR-182-3p | -0,08 | -0,11 |
| JMY         | ENST00000396137.4 | hsa-miR-182-3p | -0,08 | -0,09 |

|              |                   |                |       |       |
|--------------|-------------------|----------------|-------|-------|
| RASSF6       | ENST00000307439.5 | hsa-miR-182-3p | -0,08 | -0,18 |
| ZBTB37       | ENST00000367701.5 | hsa-miR-182-3p | -0,08 | -0,09 |
| TRHDE        | ENST00000261180.4 | hsa-miR-182-3p | -0,08 | -0,15 |
| GPR153       | ENST00000377893.2 | hsa-miR-182-3p | -0,08 | -0,08 |
| SRL          | ENST00000399609.3 | hsa-miR-182-3p | -0,08 | -0,08 |
| KCNJ5        | ENST00000529694.1 | hsa-miR-182-3p | -0,08 | -0,08 |
| VAV2         | ENST00000406606.3 | hsa-miR-182-3p | -0,08 | -0,14 |
| KDM4B        | ENST00000159111.4 | hsa-miR-182-3p | -0,08 | -0,08 |
| APOL2        | ENST00000358502.5 | hsa-miR-182-3p | -0,08 | -0,2  |
| PDK1         | ENST00000282077.3 | hsa-miR-182-3p | -0,08 | -0,28 |
| IL7R         | ENST00000343305.4 | hsa-miR-182-3p | -0,08 | -0,08 |
| BBS9         | ENST00000242067.6 | hsa-miR-182-3p | -0,08 | -0,21 |
| MED13L       | ENST00000281928.3 | hsa-miR-182-3p | -0,08 | -0,11 |
| CNOT6        | ENST00000393356.1 | hsa-miR-182-3p | -0,08 | -0,08 |
| KIAA1244     | ENST00000251691.4 | hsa-miR-182-3p | -0,08 | -0,1  |
| GOSR2        | ENST00000576910.2 | hsa-miR-182-3p | -0,08 | -0,22 |
| TGFBR3       | ENST00000212355.4 | hsa-miR-182-3p | -0,08 | -0,08 |
| ZNF74        | ENST00000357502.5 | hsa-miR-182-3p | -0,08 | -0,08 |
| CLSTN2       | ENST00000458420.3 | hsa-miR-182-3p | -0,08 | -0,09 |
| FAM211A      | ENST00000409083.3 | hsa-miR-182-3p | -0,08 | -0,14 |
| GPRC5B       | ENST00000300571.2 | hsa-miR-182-3p | -0,08 | -0,08 |
| ZNF827       | ENST00000379448.4 | hsa-miR-182-3p | -0,08 | -0,08 |
| TTC5         | ENST00000258821.3 | hsa-miR-182-3p | -0,08 | -0,12 |
| RREB1        | ENST00000379938.2 | hsa-miR-182-3p | -0,08 | -0,08 |
| NOC3L        | ENST00000371361.3 | hsa-miR-182-3p | -0,08 | -0,08 |
| ASIC1        | ENST00000228468.4 | hsa-miR-182-3p | -0,08 | -0,08 |
| PPP4R2       | ENST00000356692.5 | hsa-miR-182-3p | -0,08 | -0,08 |
| C1orf216     | ENST00000270815.4 | hsa-miR-182-3p | -0,08 | -0,08 |
| AC132186.1   | ENST00000544589.1 | hsa-miR-182-3p | -0,08 | -0,08 |
| KRTAP4-9     | ENST00000391415.1 | hsa-miR-182-3p | -0,08 | -0,16 |
| CEMP1        | ENST00000382350.1 | hsa-miR-182-3p | -0,08 | -0,08 |
| TANGO6       | ENST00000261778.1 | hsa-miR-182-3p | -0,08 | -0,12 |
| FER          | ENST00000281092.4 | hsa-miR-182-3p | -0,08 | -0,08 |
| GNS          | ENST00000418919.2 | hsa-miR-182-3p | -0,08 | -0,09 |
| KCTD2        | ENST00000322444.6 | hsa-miR-182-3p | -0,08 | -0,08 |
| ADNP2        | ENST00000262198.4 | hsa-miR-182-3p | -0,08 | -0,1  |
| SEMA5A       | ENST00000382496.5 | hsa-miR-182-3p | -0,08 | -0,1  |
| CALM3        | ENST00000291295.9 | hsa-miR-182-3p | -0,08 | -0,12 |
| SIM1         | ENST00000369208.3 | hsa-miR-182-3p | -0,08 | -0,08 |
| AAGAB        | ENST00000261880.5 | hsa-miR-182-3p | -0,08 | -0,27 |
| MOB1A        | ENST00000396049.4 | hsa-miR-182-3p | -0,08 | -0,15 |
| BICD1        | ENST00000548411.1 | hsa-miR-182-3p | -0,08 | -0,09 |
| CDYL2        | ENST00000570137.2 | hsa-miR-182-3p | -0,08 | -0,1  |
| MPP6         | ENST00000222644.5 | hsa-miR-182-3p | -0,08 | -0,15 |
| RBM39        | ENST00000253363.6 | hsa-miR-182-3p | -0,08 | -0,18 |
| NKX3-1       | ENST00000380871.4 | hsa-miR-182-3p | -0,08 | -0,08 |
| RAD54L2      | ENST00000409535.2 | hsa-miR-182-3p | -0,08 | -0,08 |
| CTC-432M15.3 | ENST00000514667.1 | hsa-miR-182-3p | -0,08 | -0,08 |
| ANKRD13C     | ENST00000370944.4 | hsa-miR-182-3p | -0,08 | -0,28 |
| FFAR4        | ENST00000371481.4 | hsa-miR-182-3p | -0,08 | -0,08 |
| TNPO2        | ENST00000425528.1 | hsa-miR-182-3p | -0,08 | -0,08 |
| PSD4         | ENST00000441564.3 | hsa-miR-182-3p | -0,08 | -0,1  |
| ORC2         | ENST00000234296.2 | hsa-miR-182-3p | -0,08 | -0,09 |
| ZNF347       | ENST00000334197.7 | hsa-miR-182-3p | -0,08 | -0,08 |
| ERAP1        | ENST00000443439.2 | hsa-miR-182-3p | -0,08 | -0,08 |
| USP49        | ENST00000394253.3 | hsa-miR-182-3p | -0,08 | -0,22 |
| LARS         | ENST00000394434.2 | hsa-miR-182-3p | -0,08 | -0,29 |
| ARHGAP19     | ENST00000358531.4 | hsa-miR-182-3p | -0,08 | -0,08 |
| LRRTM4       | ENST00000409911.1 | hsa-miR-182-3p | -0,08 | -0,08 |
| SLC26A4      | ENST00000265715.3 | hsa-miR-182-3p | -0,08 | -0,08 |
| PSD2         | ENST00000274710.3 | hsa-miR-182-3p | -0,08 | -0,08 |
| FRAS1        | ENST00000264895.6 | hsa-miR-182-3p | -0,08 | -0,08 |
| IRF4         | ENST00000380956.4 | hsa-miR-182-3p | -0,08 | -0,08 |
| MED7         | ENST00000286317.5 | hsa-miR-182-3p | -0,08 | -0,38 |
| ETS1         | ENST00000531611.1 | hsa-miR-182-3p | -0,08 | -0,08 |
| KCNAB3       | ENST00000303790.2 | hsa-miR-182-3p | -0,08 | -0,18 |

|          |                   |                |       |       |
|----------|-------------------|----------------|-------|-------|
| AGFG1    | ENST00000310078.8 | hsa-miR-182-3p | -0,08 | -0,08 |
| PRKCA    | ENST00000413366.3 | hsa-miR-182-3p | -0,08 | -0,14 |
| FAM126B  | ENST00000418596.3 | hsa-miR-182-3p | -0,08 | -0,08 |
| RRM2B    | ENST00000251810.3 | hsa-miR-182-3p | -0,07 | -0,07 |
| GJD3     | ENST00000578689.1 | hsa-miR-182-3p | -0,07 | -0,07 |
| DLG5     | ENST00000372391.2 | hsa-miR-182-3p | -0,07 | -0,07 |
| FAXDC2   | ENST00000326080.5 | hsa-miR-182-3p | -0,07 | -0,07 |
| RPS6KA2  | ENST00000265678.4 | hsa-miR-182-3p | -0,07 | -0,07 |
| PCF11    | ENST00000298281.4 | hsa-miR-182-3p | -0,07 | -0,11 |
| LAD1     | ENST00000391967.2 | hsa-miR-182-3p | -0,07 | -0,24 |
| PLAA     | ENST00000397292.3 | hsa-miR-182-3p | -0,07 | -0,16 |
| IPCEF1   | ENST00000265198.4 | hsa-miR-182-3p | -0,07 | -0,07 |
| SYPL2    | ENST00000369872.3 | hsa-miR-182-3p | -0,07 | -0,07 |
| GPR68    | ENST00000531499.2 | hsa-miR-182-3p | -0,07 | -0,07 |
| FLT1     | ENST00000282397.4 | hsa-miR-182-3p | -0,07 | -0,07 |
| ACTN2    | ENST00000366578.4 | hsa-miR-182-3p | -0,07 | -0,17 |
| RTKN2    | ENST00000373789.3 | hsa-miR-182-3p | -0,07 | -0,07 |
| FAM69A   | ENST00000370310.4 | hsa-miR-182-3p | -0,07 | -0,17 |
| OLA1     | ENST00000284719.3 | hsa-miR-182-3p | -0,07 | -0,16 |
| SLC25A45 | ENST00000527174.1 | hsa-miR-182-3p | -0,07 | -0,09 |
| LRRFIP2  | ENST00000421307.1 | hsa-miR-182-3p | -0,07 | -0,15 |
| RFTN2    | ENST00000295049.4 | hsa-miR-182-3p | -0,07 | -0,12 |
| GID4     | ENST00000268719.4 | hsa-miR-182-3p | -0,07 | -0,16 |
| DOCK3    | ENST00000266037.9 | hsa-miR-182-3p | -0,07 | -0,07 |
| NECAP1   | ENST00000339754.5 | hsa-miR-182-3p | -0,07 | -0,07 |
| PLIN4    | ENST00000301286.3 | hsa-miR-182-3p | -0,07 | -0,07 |
| YPEL2    | ENST00000312655.4 | hsa-miR-182-3p | -0,07 | -0,07 |
| FAM155A  | ENST00000375915.2 | hsa-miR-182-3p | -0,07 | -0,12 |
| KCNH8    | ENST00000328405.2 | hsa-miR-182-3p | -0,07 | -0,07 |
| SULT2A1  | ENST00000222002.3 | hsa-miR-182-3p | -0,07 | -0,1  |
| PNPLA3   | ENST00000216180.3 | hsa-miR-182-3p | -0,07 | -0,09 |
| USP13    | ENST00000263966.3 | hsa-miR-182-3p | -0,07 | -0,08 |
| AP1S3    | ENST00000396654.2 | hsa-miR-182-3p | -0,07 | -0,24 |
| ACER2    | ENST00000340967.2 | hsa-miR-182-3p | -0,07 | -0,08 |
| FZR1     | ENST00000441788.2 | hsa-miR-182-3p | -0,07 | -0,08 |
| DIEXF    | ENST00000491415.2 | hsa-miR-182-3p | -0,07 | -0,1  |
| SNX29    | ENST00000566228.1 | hsa-miR-182-3p | -0,07 | -0,07 |
| ABCC12   | ENST00000416054.1 | hsa-miR-182-3p | -0,07 | -0,07 |
| ITPKC    | ENST00000263370.2 | hsa-miR-182-3p | -0,07 | -0,07 |
| CD300E   | ENST00000392619.1 | hsa-miR-182-3p | -0,07 | -0,07 |
| HHAT     | ENST00000413764.2 | hsa-miR-182-3p | -0,07 | -0,07 |
| KIAA0319 | ENST00000537886.1 | hsa-miR-182-3p | -0,07 | -0,1  |
| CYB5B    | ENST00000512062.1 | hsa-miR-182-3p | -0,07 | -0,08 |
| GATAD1   | ENST00000287957.3 | hsa-miR-182-3p | -0,07 | -0,14 |
| RACGAP1  | ENST00000427314.2 | hsa-miR-182-3p | -0,07 | -0,13 |
| GNAL     | ENST00000334049.6 | hsa-miR-182-3p | -0,07 | -0,11 |
| MAP2     | ENST00000360351.4 | hsa-miR-182-3p | -0,07 | -0,1  |
| VTI1B    | ENST00000554659.1 | hsa-miR-182-3p | -0,07 | -0,13 |
| POM121   | ENST00000395270.1 | hsa-miR-182-3p | -0,07 | -0,07 |
| BLOC1S2  | ENST00000441611.1 | hsa-miR-182-3p | -0,07 | -0,15 |
| CSNK1A1  | ENST00000261798.5 | hsa-miR-182-3p | -0,07 | -0,2  |
| SULT1B1  | ENST00000310613.3 | hsa-miR-182-3p | -0,07 | -0,07 |
| GYS1     | ENST00000323798.3 | hsa-miR-182-3p | -0,07 | -0,07 |
| POU5F1B  | ENST00000465342.2 | hsa-miR-182-3p | -0,07 | -0,07 |
| TOX4     | ENST00000405508.1 | hsa-miR-182-3p | -0,07 | -0,1  |
| MPRIIP   | ENST00000341712.4 | hsa-miR-182-3p | -0,07 | -0,09 |
| GPR107   | ENST00000372410.3 | hsa-miR-182-3p | -0,07 | -0,11 |
| BRD7     | ENST00000394688.3 | hsa-miR-182-3p | -0,07 | -0,14 |
| TMC5     | ENST00000381414.4 | hsa-miR-182-3p | -0,07 | -0,08 |
| LIN7A    | ENST00000552864.1 | hsa-miR-182-3p | -0,07 | -0,2  |
| ZNRF3    | ENST00000544604.2 | hsa-miR-182-3p | -0,07 | -0,08 |
| CACNA1E  | ENST00000526775.1 | hsa-miR-182-3p | -0,07 | -0,07 |
| CXXC4    | ENST00000394767.2 | hsa-miR-182-3p | -0,07 | -0,08 |
| CNTNAP5  | ENST00000431078.1 | hsa-miR-182-3p | -0,07 | -0,07 |
| LPHN3    | ENST00000512091.2 | hsa-miR-182-3p | -0,07 | -0,07 |
| PCDH17   | ENST00000377918.3 | hsa-miR-182-3p | -0,07 | -0,16 |

|                 |                   |                |       |       |
|-----------------|-------------------|----------------|-------|-------|
| RAPGEF6         | ENST00000509018.1 | hsa-miR-182-3p | -0,07 | -0,07 |
| DCUN1D3         | ENST00000324344.4 | hsa-miR-182-3p | -0,07 | -0,11 |
| MOCOS           | ENST00000261326.5 | hsa-miR-182-3p | -0,07 | -0,1  |
| SERBP1          | ENST00000370994.4 | hsa-miR-182-3p | -0,07 | -0,08 |
| FREM1           | ENST00000380881.4 | hsa-miR-182-3p | -0,07 | -0,09 |
| LINC00346       | ENST00000538077.1 | hsa-miR-182-3p | -0,07 | -0,12 |
| KBTBD8          | ENST00000295568.4 | hsa-miR-182-3p | -0,07 | -0,07 |
| PRPH2           | ENST00000230381.5 | hsa-miR-182-3p | -0,07 | -0,07 |
| SORD            | ENST00000267814.9 | hsa-miR-182-3p | -0,07 | -0,07 |
| AC005477.1      | ENST00000542853.1 | hsa-miR-182-3p | -0,07 | -0,07 |
| HRH1            | ENST00000397056.1 | hsa-miR-182-3p | -0,07 | -0,07 |
| SEC31B          | ENST00000370345.3 | hsa-miR-182-3p | -0,07 | -0,07 |
| ANKRD34A        | ENST00000323397.4 | hsa-miR-182-3p | -0,07 | -0,07 |
| LHX6            | ENST00000373755.2 | hsa-miR-182-3p | -0,07 | -0,07 |
| GCH1            | ENST00000491895.2 | hsa-miR-182-3p | -0,07 | -0,07 |
| GSTO2           | ENST00000369707.2 | hsa-miR-182-3p | -0,07 | -0,13 |
| SLC8A3          | ENST00000356921.2 | hsa-miR-182-3p | -0,07 | -0,07 |
| SGSM1           | ENST00000400358.4 | hsa-miR-182-3p | -0,07 | -0,07 |
| DACH1           | ENST00000305425.4 | hsa-miR-182-3p | -0,07 | -0,07 |
| GRIN1           | ENST00000371561.3 | hsa-miR-182-3p | -0,07 | -0,07 |
| GPR158          | ENST00000376351.3 | hsa-miR-182-3p | -0,07 | -0,07 |
| RBM8A           | ENST00000330165.8 | hsa-miR-182-3p | -0,07 | -0,07 |
| ATG10           | ENST00000282185.3 | hsa-miR-182-3p | -0,07 | -0,12 |
| CD180           | ENST00000256447.4 | hsa-miR-182-3p | -0,07 | -0,16 |
| RNF14           | ENST00000394520.2 | hsa-miR-182-3p | -0,07 | -0,09 |
| ASAH2           | ENST00000395526.4 | hsa-miR-182-3p | -0,07 | -0,07 |
| DLGAP2          | ENST00000421627.2 | hsa-miR-182-3p | -0,07 | -0,07 |
| CHRM2           | ENST00000445907.2 | hsa-miR-182-3p | -0,07 | -0,07 |
| TMEM132D        | ENST00000389441.4 | hsa-miR-182-3p | -0,07 | -0,07 |
| GLG1            | ENST00000422840.2 | hsa-miR-182-3p | -0,07 | -0,07 |
| CNTN2           | ENST00000331830.4 | hsa-miR-182-3p | -0,07 | -0,07 |
| IFNE            | ENST00000448696.3 | hsa-miR-182-3p | -0,07 | -0,24 |
| HNRNPU          | ENST00000444376.2 | hsa-miR-182-3p | -0,07 | -0,18 |
| TULP4           | ENST00000367094.2 | hsa-miR-182-3p | -0,07 | -0,08 |
| COLGALT1        | ENST00000252599.4 | hsa-miR-182-3p | -0,07 | -0,08 |
| ZBTB39          | ENST00000300101.2 | hsa-miR-182-3p | -0,07 | -0,07 |
| ERCC4           | ENST00000311895.7 | hsa-miR-182-3p | -0,07 | -0,07 |
| KLHL6           | ENST00000341319.3 | hsa-miR-182-3p | -0,07 | -0,07 |
| RUNX3           | ENST00000399916.1 | hsa-miR-182-3p | -0,07 | -0,07 |
| CPED1           | ENST00000310396.5 | hsa-miR-182-3p | -0,07 | -0,07 |
| KREMEN1         | ENST00000400335.4 | hsa-miR-182-3p | -0,07 | -0,07 |
| FHDC1           | ENST00000260008.3 | hsa-miR-182-3p | -0,07 | -0,07 |
| ZC3H6           | ENST00000343936.4 | hsa-miR-182-3p | -0,07 | -0,07 |
| FAM3C           | ENST00000359943.3 | hsa-miR-182-3p | -0,07 | -0,07 |
| SAMD8           | ENST00000372687.4 | hsa-miR-182-3p | -0,07 | -0,14 |
| ZNF799          | ENST00000419318.1 | hsa-miR-182-3p | -0,07 | -0,09 |
| CYTIP           | ENST00000264192.3 | hsa-miR-182-3p | -0,07 | -0,11 |
| CYP2U1          | ENST00000332884.6 | hsa-miR-182-3p | -0,07 | -0,07 |
| FUT11           | ENST00000394790.1 | hsa-miR-182-3p | -0,07 | -0,07 |
| RIPPLY3         | ENST00000329553.2 | hsa-miR-182-3p | -0,07 | -0,07 |
| ITGA11          | ENST00000423218.2 | hsa-miR-182-3p | -0,07 | -0,18 |
| FBXO22          | ENST00000308275.3 | hsa-miR-182-3p | -0,07 | -0,24 |
| AKNA            | ENST00000307564.4 | hsa-miR-182-3p | -0,07 | -0,07 |
| RPS6KA6         | ENST00000262752.2 | hsa-miR-182-3p | -0,06 | -0,07 |
| GLI3            | ENST00000395925.3 | hsa-miR-182-3p | -0,06 | -0,07 |
| PDPK1           | ENST00000441549.3 | hsa-miR-182-3p | -0,06 | -0,07 |
| ALS2            | ENST00000457679.2 | hsa-miR-182-3p | -0,06 | -0,07 |
| CALML4          | ENST00000395465.3 | hsa-miR-182-3p | -0,06 | -1,05 |
| NR4A3           | ENST00000330847.1 | hsa-miR-182-3p | -0,06 | -0,12 |
| SLC4A8          | ENST00000453097.2 | hsa-miR-182-3p | -0,06 | -0,09 |
| FADS1           | ENST00000350997.7 | hsa-miR-182-3p | -0,06 | -0,2  |
| UNC13C          | ENST00000545554.1 | hsa-miR-182-3p | -0,06 | -0,06 |
| IFI44L          | ENST00000370751.5 | hsa-miR-182-3p | -0,06 | -0,06 |
| LL22NC03-63E9.3 | ENST00000407120.1 | hsa-miR-182-3p | -0,06 | -0,06 |
| PLEKHG4B        | ENST00000283426.6 | hsa-miR-182-3p | -0,06 | -0,06 |
| SPN             | ENST00000360121.3 | hsa-miR-182-3p | -0,06 | -0,06 |

|           |                   |                |       |       |
|-----------|-------------------|----------------|-------|-------|
| NEURL1B   | ENST00000369800.5 | hsa-miR-182-3p | -0,06 | -0,06 |
| KIAA1644  | ENST00000381176.4 | hsa-miR-182-3p | -0,06 | -0,09 |
| OSBPL3    | ENST00000313367.2 | hsa-miR-182-3p | -0,06 | -0,11 |
| PDE8A     | ENST00000310298.4 | hsa-miR-182-3p | -0,06 | -0,09 |
| GABPB2    | ENST00000368918.3 | hsa-miR-182-3p | -0,06 | -0,09 |
| STARD5    | ENST00000302824.6 | hsa-miR-182-3p | -0,06 | -0,27 |
| RAB8B     | ENST00000321437.4 | hsa-miR-182-3p | -0,06 | -0,07 |
| DTL       | ENST00000366991.4 | hsa-miR-182-3p | -0,06 | -0,07 |
| UNC5C     | ENST00000453304.1 | hsa-miR-182-3p | -0,06 | -0,08 |
| ZNF852    | ENST00000436261.1 | hsa-miR-182-3p | -0,06 | -0,08 |
| SCAMP5    | ENST00000425597.3 | hsa-miR-182-3p | -0,06 | -0,06 |
| KSR2      | ENST00000425217.1 | hsa-miR-182-3p | -0,06 | -0,06 |
| TAS2R5    | ENST00000247883.4 | hsa-miR-182-3p | -0,06 | -0,18 |
| FOXK2     | ENST00000335255.5 | hsa-miR-182-3p | -0,06 | -0,17 |
| TAF8      | ENST00000372977.3 | hsa-miR-182-3p | -0,06 | -0,09 |
| POLR3H    | ENST00000396504.2 | hsa-miR-182-3p | -0,06 | -0,06 |
| KLF13     | ENST00000307145.3 | hsa-miR-182-3p | -0,06 | -0,06 |
| ZBTB43    | ENST00000449886.1 | hsa-miR-182-3p | -0,06 | -0,06 |
| MET       | ENST00000397752.3 | hsa-miR-182-3p | -0,06 | -0,06 |
| PITPNM3   | ENST00000421306.3 | hsa-miR-182-3p | -0,06 | -0,06 |
| UBE2Q2    | ENST00000267938.4 | hsa-miR-182-3p | -0,06 | -0,42 |
| JHDM1D    | ENST00000397560.2 | hsa-miR-182-3p | -0,06 | -0,07 |
| PEX26     | ENST00000329627.7 | hsa-miR-182-3p | -0,06 | -0,13 |
| OXTR      | ENST00000316793.3 | hsa-miR-182-3p | -0,06 | -0,1  |
| HNRNPA1   | ENST00000546500.1 | hsa-miR-182-3p | -0,06 | -0,06 |
| GPR161    | ENST00000367838.1 | hsa-miR-182-3p | -0,06 | -0,07 |
| PSEN1     | ENST00000344094.3 | hsa-miR-182-3p | -0,06 | -0,1  |
| MYNN      | ENST00000544106.1 | hsa-miR-182-3p | -0,06 | -0,21 |
| PNO1      | ENST00000263657.2 | hsa-miR-182-3p | -0,06 | -0,27 |
| WDPCP     | ENST00000272321.7 | hsa-miR-182-3p | -0,06 | -0,08 |
| FAF1      | ENST00000396153.2 | hsa-miR-182-3p | -0,06 | -0,15 |
| ST8SIA2   | ENST00000268164.3 | hsa-miR-182-3p | -0,06 | -0,06 |
| FSTL3     | ENST00000166139.4 | hsa-miR-182-3p | -0,06 | -0,15 |
| FAM120AOS | ENST00000423591.1 | hsa-miR-182-3p | -0,06 | -0,09 |
| SCML2     | ENST00000398048.3 | hsa-miR-182-3p | -0,06 | -0,28 |
| ZIC4      | ENST00000383075.3 | hsa-miR-182-3p | -0,06 | -0,06 |
| ACAP2     | ENST00000326793.6 | hsa-miR-182-3p | -0,06 | -0,07 |
| UBR1      | ENST00000382177.2 | hsa-miR-182-3p | -0,06 | -0,14 |
| RORA      | ENST00000335670.6 | hsa-miR-182-3p | -0,06 | -0,07 |
| SLC5A12   | ENST00000396005.3 | hsa-miR-182-3p | -0,06 | -0,1  |
| PCMTD1    | ENST00000360540.5 | hsa-miR-182-3p | -0,06 | -0,06 |
| PANK3     | ENST00000239231.6 | hsa-miR-182-3p | -0,06 | -0,16 |
| ADD1      | ENST00000398125.1 | hsa-miR-182-3p | -0,06 | -0,06 |
| MINA      | ENST00000333396.7 | hsa-miR-182-3p | -0,06 | -0,18 |
| PPP1R12B  | ENST00000608999.1 | hsa-miR-182-3p | -0,06 | -0,08 |
| CCDC176   | ENST00000394009.3 | hsa-miR-182-3p | -0,06 | -0,06 |
| SLX4IP    | ENST00000334534.5 | hsa-miR-182-3p | -0,06 | -0,06 |
| FDX1      | ENST00000260270.2 | hsa-miR-182-3p | -0,06 | -0,32 |
| NCOA1     | ENST00000405141.1 | hsa-miR-182-3p | -0,06 | -0,06 |
| TYRO3     | ENST00000263798.3 | hsa-miR-182-3p | -0,06 | -0,09 |
| EPHA5     | ENST00000273854.3 | hsa-miR-182-3p | -0,06 | -0,09 |
| STEAP3    | ENST00000409811.1 | hsa-miR-182-3p | -0,06 | -0,16 |
| MED13     | ENST00000397786.2 | hsa-miR-182-3p | -0,06 | -0,09 |
| GSTM4     | ENST00000369833.1 | hsa-miR-182-3p | -0,06 | -0,06 |
| MTUS1     | ENST00000381869.3 | hsa-miR-182-3p | -0,06 | -0,06 |
| KCND3     | ENST00000369697.1 | hsa-miR-182-3p | -0,06 | -0,06 |
| ZNF747    | ENST00000395094.3 | hsa-miR-182-3p | -0,06 | -0,11 |
| FAM20B    | ENST00000263733.4 | hsa-miR-182-3p | -0,06 | -0,08 |
| GMEB1     | ENST00000373816.1 | hsa-miR-182-3p | -0,06 | -0,17 |
| DGKI      | ENST00000453654.2 | hsa-miR-182-3p | -0,06 | -0,19 |
| ADAMTS5   | ENST00000284987.5 | hsa-miR-182-3p | -0,06 | -0,14 |
| ZNF230    | ENST00000429154.2 | hsa-miR-182-3p | -0,06 | -0,19 |
| ENTPD1    | ENST00000371207.3 | hsa-miR-182-3p | -0,06 | -0,09 |
| DUOX2     | ENST00000389039.6 | hsa-miR-182-3p | -0,06 | -0,06 |
| EZH1      | ENST00000428826.2 | hsa-miR-182-3p | -0,06 | -0,06 |
| ABCG2     | ENST00000515655.1 | hsa-miR-182-3p | -0,06 | -0,17 |

|          |                   |                |       |       |
|----------|-------------------|----------------|-------|-------|
| TMPPE    | ENST00000416695.2 | hsa-miR-182-3p | -0,06 | -0,23 |
| STS      | ENST00000217961.4 | hsa-miR-182-3p | -0,06 | -0,07 |
| SYNPO2   | ENST00000429713.2 | hsa-miR-182-3p | -0,06 | -0,1  |
| MTIF2    | ENST00000403721.1 | hsa-miR-182-3p | -0,06 | -0,14 |
| FBXO46   | ENST00000317683.3 | hsa-miR-182-3p | -0,06 | -0,06 |
| ADAMTS17 | ENST00000268070.4 | hsa-miR-182-3p | -0,06 | -0,06 |
| ZBTB10   | ENST00000430430.1 | hsa-miR-182-3p | -0,06 | -0,11 |
| MAVS     | ENST00000428216.2 | hsa-miR-182-3p | -0,06 | -0,08 |
| NR2C2    | ENST00000425241.1 | hsa-miR-182-3p | -0,06 | -0,06 |
| TOMM40   | ENST00000592434.1 | hsa-miR-182-3p | -0,06 | -0,08 |
| GOPC     | ENST00000368498.2 | hsa-miR-182-3p | -0,06 | -0,11 |
| CARNS1   | ENST00000307823.3 | hsa-miR-182-3p | -0,06 | -0,06 |
| CALN1    | ENST00000329008.5 | hsa-miR-182-3p | -0,06 | -0,06 |
| PKDREJ   | ENST00000253255.5 | hsa-miR-182-3p | -0,06 | -0,06 |
| ADAMTS14 | ENST00000373208.1 | hsa-miR-182-3p | -0,06 | -0,06 |
| TP63     | ENST00000392460.3 | hsa-miR-182-3p | -0,06 | -0,06 |
| ZNF26    | ENST00000328654.5 | hsa-miR-182-3p | -0,06 | -0,19 |
| CTBP2    | ENST00000337195.5 | hsa-miR-182-3p | -0,06 | -0,17 |
| CAB39L   | ENST00000355854.4 | hsa-miR-182-3p | -0,06 | -0,14 |
| ZNF497   | ENST00000311044.3 | hsa-miR-182-3p | -0,06 | -0,06 |
| AMER3    | ENST00000423981.1 | hsa-miR-182-3p | -0,06 | -0,06 |
| LYST     | ENST00000389794.3 | hsa-miR-182-3p | -0,06 | -0,06 |
| NBPF20   | ENST00000369202.1 | hsa-miR-182-3p | -0,06 | -0,06 |
| RRP1B    | ENST00000340648.4 | hsa-miR-182-3p | -0,05 | -0,06 |
| ADAR     | ENST00000292205.5 | hsa-miR-182-3p | -0,05 | -0,06 |
| FAM175A  | ENST00000321945.7 | hsa-miR-182-3p | -0,05 | -0,15 |
| CD99L2   | ENST00000370377.3 | hsa-miR-182-3p | -0,05 | -0,06 |
| DAB1     | ENST00000371236.2 | hsa-miR-182-3p | -0,05 | -0,08 |
| SH3PXD2A | ENST00000369774.4 | hsa-miR-182-3p | -0,05 | -0,06 |
| COG3     | ENST00000349995.5 | hsa-miR-182-3p | -0,05 | -0,05 |
| TFE3     | ENST00000315869.7 | hsa-miR-182-3p | -0,05 | -0,05 |
| KIAA1199 | ENST00000220244.3 | hsa-miR-182-3p | -0,05 | -0,05 |
| ATG12    | ENST00000500945.2 | hsa-miR-182-3p | -0,05 | -0,2  |
| EIF4E3   | ENST00000425534.3 | hsa-miR-182-3p | -0,05 | -0,21 |
| ACVR2B   | ENST00000352511.4 | hsa-miR-182-3p | -0,05 | -0,11 |
| TSHZ2    | ENST00000371497.5 | hsa-miR-182-3p | -0,05 | -0,05 |
| PAG1     | ENST00000220597.4 | hsa-miR-182-3p | -0,05 | -0,06 |
| HELZ2    | ENST00000427522.2 | hsa-miR-182-3p | -0,05 | -0,05 |
| MRI1     | ENST00000319545.8 | hsa-miR-182-3p | -0,05 | -0,05 |
| PPP4R1L  | ENST00000334187.8 | hsa-miR-182-3p | -0,05 | -0,07 |
| EOGT     | ENST00000383701.3 | hsa-miR-182-3p | -0,05 | -0,25 |
| GMDS     | ENST00000530927.1 | hsa-miR-182-3p | -0,05 | -0,17 |
| PADI2    | ENST00000375486.4 | hsa-miR-182-3p | -0,05 | -0,12 |
| RNMT     | ENST00000383314.2 | hsa-miR-182-3p | -0,05 | -0,08 |
| AUTS2    | ENST00000342771.4 | hsa-miR-182-3p | -0,05 | -0,08 |
| TELO2    | ENST00000262319.6 | hsa-miR-182-3p | -0,05 | -0,05 |
| XIAP     | ENST00000371199.3 | hsa-miR-182-3p | -0,05 | -0,08 |
| ZNF629   | ENST00000262525.4 | hsa-miR-182-3p | -0,05 | -0,05 |
| SLC8A2   | ENST00000236877.6 | hsa-miR-182-3p | -0,05 | -0,05 |
| CRLF1    | ENST00000392386.3 | hsa-miR-182-3p | -0,05 | -0,05 |
| FRMPD4   | ENST00000380682.1 | hsa-miR-182-3p | -0,05 | -0,05 |
| GPR110   | ENST00000371253.2 | hsa-miR-182-3p | -0,05 | -0,05 |
| ZBTB8B   | ENST00000609129.1 | hsa-miR-182-3p | -0,05 | -0,07 |
| ZNF460   | ENST00000360338.3 | hsa-miR-182-3p | -0,05 | -0,07 |
| DTWD2    | ENST00000304058.4 | hsa-miR-182-3p | -0,05 | -0,07 |
| TET3     | ENST00000409262.3 | hsa-miR-182-3p | -0,05 | -0,05 |
| MBNL3    | ENST00000370839.3 | hsa-miR-182-3p | -0,05 | -0,06 |
| C9orf91  | ENST00000374049.4 | hsa-miR-182-3p | -0,05 | -0,15 |
| BTBD7    | ENST00000334746.5 | hsa-miR-182-3p | -0,05 | -0,06 |
| PARVA    | ENST00000334956.8 | hsa-miR-182-3p | -0,05 | -0,15 |
| DHDDS    | ENST00000360009.2 | hsa-miR-182-3p | -0,05 | -0,1  |
| RPP14    | ENST00000445193.3 | hsa-miR-182-3p | -0,05 | -0,18 |
| GALNT2   | ENST00000366672.4 | hsa-miR-182-3p | -0,05 | -0,05 |
| HIF3A    | ENST00000377670.4 | hsa-miR-182-3p | -0,05 | -0,05 |
| HPCAL4   | ENST00000372844.3 | hsa-miR-182-3p | -0,05 | -0,05 |
| MAP4     | ENST00000383737.4 | hsa-miR-182-3p | -0,05 | -0,05 |

|          |                   |                |       |       |
|----------|-------------------|----------------|-------|-------|
| NAIP     | ENST00000517649.1 | hsa-miR-182-3p | -0,05 | -0,05 |
| IMPAD1   | ENST00000262644.4 | hsa-miR-182-3p | -0,05 | -0,1  |
| ZC3H12C  | ENST00000278590.3 | hsa-miR-182-3p | -0,05 | -0,06 |
| PRKAR2A  | ENST00000265563.8 | hsa-miR-182-3p | -0,05 | -0,05 |
| PPFIBP1  | ENST00000318304.8 | hsa-miR-182-3p | -0,05 | -0,09 |
| SAP30L   | ENST00000297109.6 | hsa-miR-182-3p | -0,05 | -0,13 |
| DNAJA2   | ENST00000317089.5 | hsa-miR-182-3p | -0,05 | -0,14 |
| EPT1     | ENST00000260585.7 | hsa-miR-182-3p | -0,05 | -0,06 |
| ZKSCAN3  | ENST00000377255.3 | hsa-miR-182-3p | -0,05 | -0,23 |
| PHF21B   | ENST00000403565.1 | hsa-miR-182-3p | -0,05 | -0,05 |
| PLXNB2   | ENST00000449103.1 | hsa-miR-182-3p | -0,05 | -0,05 |
| ERBB4    | ENST00000342788.4 | hsa-miR-182-3p | -0,05 | -0,05 |
| CCNJL    | ENST00000393977.3 | hsa-miR-182-3p | -0,05 | -0,08 |
| GRIN2B   | ENST00000609686.1 | hsa-miR-182-3p | -0,05 | -0,05 |
| FGF19    | ENST00000294312.3 | hsa-miR-182-3p | -0,05 | -0,12 |
| MSL2     | ENST00000309993.2 | hsa-miR-182-3p | -0,05 | -0,13 |
| API5     | ENST00000534600.1 | hsa-miR-182-3p | -0,05 | -0,17 |
| NLRC5    | ENST00000436936.1 | hsa-miR-182-3p | -0,05 | -0,05 |
| MREG     | ENST00000263268.6 | hsa-miR-182-3p | -0,05 | -0,07 |
| EDC3     | ENST00000315127.4 | hsa-miR-182-3p | -0,05 | -0,15 |
| SENP2    | ENST00000296257.5 | hsa-miR-182-3p | -0,05 | -0,17 |
| CREB3L2  | ENST00000330387.6 | hsa-miR-182-3p | -0,05 | -0,05 |
| GAN      | ENST00000568107.2 | hsa-miR-182-3p | -0,05 | -0,08 |
| PPP6C    | ENST00000373547.4 | hsa-miR-182-3p | -0,05 | -0,18 |
| ZNF585B  | ENST00000532828.2 | hsa-miR-182-3p | -0,05 | -0,08 |
| CYTH1    | ENST00000585509.1 | hsa-miR-182-3p | -0,05 | -0,05 |
| IKZF4    | ENST00000262032.5 | hsa-miR-182-3p | -0,05 | -0,05 |
| PML      | ENST00000565898.1 | hsa-miR-182-3p | -0,05 | -0,05 |
| TFCP2L1  | ENST00000263707.5 | hsa-miR-182-3p | -0,05 | -0,05 |
| UBN2     | ENST00000473989.3 | hsa-miR-182-3p | -0,05 | -0,05 |
| KNOP1    | ENST00000219837.7 | hsa-miR-182-3p | -0,05 | -0,09 |
| ACSM3    | ENST00000289416.5 | hsa-miR-182-3p | -0,05 | -0,17 |
| CACNA1G  | ENST00000352832.5 | hsa-miR-182-3p | -0,05 | -0,11 |
| TTBK2    | ENST00000267890.6 | hsa-miR-182-3p | -0,05 | -0,05 |
| NCOA3    | ENST00000341724.6 | hsa-miR-182-3p | -0,05 | -0,06 |
| RFX3     | ENST00000382004.3 | hsa-miR-182-3p | -0,05 | -0,07 |
| ALG1     | ENST00000262374.5 | hsa-miR-182-3p | -0,05 | -0,09 |
| SYT2     | ENST00000367267.1 | hsa-miR-182-3p | -0,05 | -0,05 |
| PPM1L    | ENST00000498165.1 | hsa-miR-182-3p | -0,05 | -0,09 |
| WNK3     | ENST00000375169.3 | hsa-miR-182-3p | -0,05 | -0,05 |
| DNM3     | ENST00000367731.1 | hsa-miR-182-3p | -0,05 | -0,05 |
| DCTN4    | ENST00000447998.2 | hsa-miR-182-3p | -0,05 | -0,2  |
| SCRN1    | ENST00000242059.5 | hsa-miR-182-3p | -0,05 | -0,05 |
| IGF2BP2  | ENST00000382199.2 | hsa-miR-182-3p | -0,05 | -0,05 |
| NADK2    | ENST00000397338.1 | hsa-miR-182-3p | -0,05 | -0,19 |
| RAB3GAP2 | ENST00000358951.2 | hsa-miR-182-3p | -0,05 | -0,09 |
| PPP2R1B  | ENST00000527614.1 | hsa-miR-182-3p | -0,05 | -0,25 |
| PGM2L1   | ENST00000298198.4 | hsa-miR-182-3p | -0,05 | -0,1  |
| KIAA1432 | ENST00000414202.2 | hsa-miR-182-3p | -0,05 | -0,05 |
| ADSS     | ENST00000366535.3 | hsa-miR-182-3p | -0,05 | -0,27 |
| RIOK2    | ENST00000283109.3 | hsa-miR-182-3p | -0,05 | -0,35 |
| FUT10    | ENST00000327671.5 | hsa-miR-182-3p | -0,05 | -0,17 |
| QRSL1    | ENST00000369046.4 | hsa-miR-182-3p | -0,05 | -0,09 |
| AMBRA1   | ENST00000314845.3 | hsa-miR-182-3p | -0,05 | -0,05 |
| ZNF502   | ENST00000296091.4 | hsa-miR-182-3p | -0,05 | -0,05 |
| REL      | ENST00000295025.8 | hsa-miR-182-3p | -0,05 | -0,05 |
| SYT13    | ENST00000020926.3 | hsa-miR-182-3p | -0,05 | -0,05 |
| NSG2     | ENST00000303177.3 | hsa-miR-182-3p | -0,05 | -0,05 |
| MOCS1    | ENST00000373186.4 | hsa-miR-182-3p | -0,05 | -0,05 |
| SPAG16   | ENST00000432529.2 | hsa-miR-182-3p | -0,05 | -0,29 |
| AMZ2     | ENST00000577273.1 | hsa-miR-182-3p | -0,05 | -0,33 |
| MYEF2    | ENST00000324324.7 | hsa-miR-182-3p | -0,05 | -0,09 |
| DUSP3    | ENST00000226004.3 | hsa-miR-182-3p | -0,05 | -0,11 |
| CERS6    | ENST00000305747.6 | hsa-miR-182-3p | -0,05 | -0,06 |
| PKIA     | ENST00000396418.2 | hsa-miR-182-3p | -0,05 | -0,98 |
| RPP40    | ENST00000380051.2 | hsa-miR-182-3p | -0,05 | -0,48 |



|               |                    |                |       |       |
|---------------|--------------------|----------------|-------|-------|
| USP22         | ENST00000261497.4  | hsa-miR-182-3p | -0,05 | -0,05 |
| SESTD1        | ENST00000428443.3  | hsa-miR-182-3p | -0,05 | -0,35 |
| PRDM15        | ENST00000422911.1  | hsa-miR-182-3p | -0,05 | -0,05 |
| GDPD5         | ENST00000443276.2  | hsa-miR-182-3p | -0,05 | -0,05 |
| PKD2          | ENST00000237596.2  | hsa-miR-182-3p | -0,05 | -0,05 |
| DST           | ENST00000312431.6  | hsa-miR-182-3p | -0,05 | -0,05 |
| GIGYF2        | ENST00000373566.3  | hsa-miR-182-3p | -0,05 | -0,11 |
| DYRK1A        | ENST00000339659.4  | hsa-miR-182-3p | -0,05 | -0,07 |
| RP11-315D16.2 | ENST00000562767.1  | hsa-miR-182-3p | -0,05 | -0,34 |
| EFR3B         | ENST00000403714.3  | hsa-miR-182-3p | -0,05 | -0,07 |
| THBS2         | ENST00000366787.3  | hsa-miR-182-3p | -0,05 | -0,13 |
| ELF4          | ENST00000335997.7  | hsa-miR-182-3p | -0,04 | -0,04 |
| FAM102B       | ENST00000370035.3  | hsa-miR-182-3p | -0,04 | -0,04 |
| TTC33         | ENST00000337702.4  | hsa-miR-182-3p | -0,04 | -0,26 |
| C1QTNF8       | ENST00000328449.5  | hsa-miR-182-3p | -0,04 | -0,18 |
| TIMM8A        | ENST00000372902.3  | hsa-miR-182-3p | -0,04 | -0,16 |
| TRABD2B       | ENST00000606738.2  | hsa-miR-182-3p | -0,04 | -0,06 |
| NEK8          | ENST00000268766.6  | hsa-miR-182-3p | -0,04 | -0,05 |
| ATF6          | ENST00000367942.3  | hsa-miR-182-3p | -0,04 | -0,27 |
| PSTPIP2       | ENST00000409746.5  | hsa-miR-182-3p | -0,04 | -0,04 |
| SOX5          | ENST00000546136.1  | hsa-miR-182-3p | -0,04 | -0,14 |
| HIST1H2AK     | ENST00000330180.2  | hsa-miR-182-3p | -0,04 | -0,21 |
| KLHL9         | ENST00000359039.4  | hsa-miR-182-3p | -0,04 | -0,05 |
| BCL2L2        | ENST00000250405.5  | hsa-miR-182-3p | -0,04 | -0,04 |
| SRGAP1        | ENST00000355086.3  | hsa-miR-182-3p | -0,04 | -0,06 |
| PVRL1         | ENST00000264025.3  | hsa-miR-182-3p | -0,04 | -0,11 |
| RP11-156E8.1  | ENST00000607453.1  | hsa-miR-182-3p | -0,04 | -0,04 |
| ZNF208        | ENST00000397126.4  | hsa-miR-182-3p | -0,04 | -0,04 |
| GLRA3         | ENST00000274093.3  | hsa-miR-182-3p | -0,04 | -0,04 |
| SCN4B         | ENST00000324727.4  | hsa-miR-182-3p | -0,04 | -0,04 |
| TYW3          | ENST00000457880.2  | hsa-miR-182-3p | -0,04 | -0,18 |
| MMAA          | ENST00000281317.5  | hsa-miR-182-3p | -0,04 | -0,17 |
| INCENP        | ENST00000394818.3  | hsa-miR-182-3p | -0,04 | -0,14 |
| TTL           | ENST00000233336.6  | hsa-miR-182-3p | -0,04 | -0,2  |
| CXADR         | ENST00000356275.6  | hsa-miR-182-3p | -0,04 | -0,2  |
| NPR3          | ENST00000265074.8  | hsa-miR-182-3p | -0,04 | -0,13 |
| SLBP          | ENST00000429429.2  | hsa-miR-182-3p | -0,04 | -0,22 |
| WWC1          | ENST00000265293.4  | hsa-miR-182-3p | -0,04 | -0,07 |
| GRK1          | ENST00000335678.6  | hsa-miR-182-3p | -0,04 | -0,04 |
| GIT2          | ENST00000355312.3  | hsa-miR-182-3p | -0,04 | -0,04 |
| DPYSL5        | ENST00000288699.6  | hsa-miR-182-3p | -0,04 | -0,06 |
| RPL10         | ENST00000424325.2  | hsa-miR-182-3p | -0,04 | -0,1  |
| ANKRD33B      | ENST00000296657.5  | hsa-miR-182-3p | -0,04 | -0,1  |
| CBX5          | ENST00000209875.4  | hsa-miR-182-3p | -0,04 | -0,13 |
| NFYB          | ENST00000240055.3  | hsa-miR-182-3p | -0,04 | -0,23 |
| MKLN1         | ENST00000352689.6  | hsa-miR-182-3p | -0,04 | -0,06 |
| SRA1          | ENST00000336283.6  | hsa-miR-182-3p | -0,04 | -0,52 |
| TTYH2         | ENST00000269346.4  | hsa-miR-182-3p | -0,04 | -0,05 |
| ZNF623        | ENST00000501748.2  | hsa-miR-182-3p | -0,04 | -0,05 |
| PAPPA         | ENST00000328252.3  | hsa-miR-182-3p | -0,04 | -0,05 |
| MAPK13        | ENST00000373766.5  | hsa-miR-182-3p | -0,04 | -0,04 |
| SRSF6         | ENST00000244020.3  | hsa-miR-182-3p | -0,04 | -0,14 |
| GPR156        | ENST00000464295.1  | hsa-miR-182-3p | -0,04 | -0,1  |
| ZNF704        | ENST00000327835.3  | hsa-miR-182-3p | -0,04 | -0,07 |
| PCYOX1        | ENST00000264441.5  | hsa-miR-182-3p | -0,04 | -0,25 |
| MCAT          | ENST00000327555.5  | hsa-miR-182-3p | -0,04 | -0,18 |
| RHBDD1        | ENST00000341329.3  | hsa-miR-182-3p | -0,04 | -0,13 |
| DUSP4         | ENST00000240100.2  | hsa-miR-182-3p | -0,04 | -0,04 |
| GLIS3         | ENST00000324333.10 | hsa-miR-182-3p | -0,04 | -0,04 |
| PRR14L        | ENST00000434485.1  | hsa-miR-182-3p | -0,04 | -0,04 |
| FOXP4         | ENST00000373063.3  | hsa-miR-182-3p | -0,04 | -0,04 |
| TEC           | ENST00000381501.3  | hsa-miR-182-3p | -0,04 | -0,09 |
| UBE2R2        | ENST00000263228.3  | hsa-miR-182-3p | -0,04 | -0,3  |
| KIAA1324      | ENST00000369939.3  | hsa-miR-182-3p | -0,04 | -0,07 |
| RALGAPA2      | ENST00000202677.7  | hsa-miR-182-3p | -0,04 | -0,05 |
| MEGF8         | ENST00000334370.4  | hsa-miR-182-3p | -0,04 | -0,04 |

|              |                   |                |       |       |
|--------------|-------------------|----------------|-------|-------|
| AC132872.2   | ENST00000598222.1 | hsa-miR-182-3p | -0,04 | -0,05 |
| ZNF621       | ENST00000339296.5 | hsa-miR-182-3p | -0,04 | -0,05 |
| MRE11A       | ENST00000323929.3 | hsa-miR-182-3p | -0,04 | -0,17 |
| ARHGAP5      | ENST00000345122.3 | hsa-miR-182-3p | -0,04 | -0,04 |
| NFKBID       | ENST00000396901.1 | hsa-miR-182-3p | -0,04 | -0,22 |
| SH3BGR2      | ENST00000369838.4 | hsa-miR-182-3p | -0,04 | -0,11 |
| ABLIM3       | ENST00000326685.7 | hsa-miR-182-3p | -0,04 | -0,07 |
| CCDC80       | ENST00000206423.3 | hsa-miR-182-3p | -0,04 | -0,14 |
| RASAL2       | ENST00000448150.3 | hsa-miR-182-3p | -0,04 | -0,11 |
| TLK1         | ENST00000431350.2 | hsa-miR-182-3p | -0,04 | -0,15 |
| C22orf29     | ENST00000407472.1 | hsa-miR-182-3p | -0,04 | -0,06 |
| RP11-10A14.4 | ENST00000518496.1 | hsa-miR-182-3p | -0,04 | -0,1  |
| STX6         | ENST00000258301.5 | hsa-miR-182-3p | -0,04 | -0,08 |
| AR           | ENST00000374690.3 | hsa-miR-182-3p | -0,04 | -0,04 |
| EPB41L5      | ENST00000443902.2 | hsa-miR-182-3p | -0,04 | -0,04 |
| SCRT1        | ENST00000332135.4 | hsa-miR-182-3p | -0,04 | -0,04 |
| PLXNA2       | ENST00000367033.3 | hsa-miR-182-3p | -0,04 | -0,04 |
| FOXO3        | ENST00000343882.6 | hsa-miR-182-3p | -0,04 | -0,04 |
| RASA4        | ENST00000262940.7 | hsa-miR-182-3p | -0,04 | -0,04 |
| KIF11        | ENST00000260731.3 | hsa-miR-182-3p | -0,04 | -0,14 |
| RABEP1       | ENST00000262477.6 | hsa-miR-182-3p | -0,04 | -0,09 |
| SPRED1       | ENST00000299084.4 | hsa-miR-182-3p | -0,04 | -0,16 |
| ACHE         | ENST00000302913.4 | hsa-miR-182-3p | -0,04 | -0,11 |
| CLCN4        | ENST00000380833.4 | hsa-miR-182-3p | -0,04 | -0,05 |
| ZFH3         | ENST00000268489.5 | hsa-miR-182-3p | -0,04 | -0,05 |
| FBLIM1       | ENST00000375771.1 | hsa-miR-182-3p | -0,04 | -0,04 |
| KCNC1        | ENST00000379472.3 | hsa-miR-182-3p | -0,04 | -0,04 |
| FTO          | ENST00000471389.1 | hsa-miR-182-3p | -0,04 | -0,14 |
| ARHGEF5      | ENST00000056217.5 | hsa-miR-182-3p | -0,04 | -0,15 |
| RNF112       | ENST00000461366.1 | hsa-miR-182-3p | -0,04 | -0,04 |
| NAA35        | ENST00000361671.5 | hsa-miR-182-3p | -0,04 | -0,12 |
| ESRRB        | ENST00000261532.7 | hsa-miR-182-3p | -0,04 | -0,18 |
| MMP15        | ENST00000219271.3 | hsa-miR-182-3p | -0,04 | -0,04 |
| NEGR1        | ENST00000357731.5 | hsa-miR-182-3p | -0,04 | -0,23 |
| HOXA13       | ENST00000222753.4 | hsa-miR-182-3p | -0,04 | -0,14 |
| PDK3         | ENST00000441463.2 | hsa-miR-182-3p | -0,04 | -0,07 |
| LRR8C        | ENST00000370454.4 | hsa-miR-182-3p | -0,04 | -0,15 |
| DIAPH2       | ENST00000324765.8 | hsa-miR-182-3p | -0,04 | -0,04 |
| MED21        | ENST00000282892.3 | hsa-miR-182-3p | -0,04 | -0,16 |
| RGS4         | ENST00000531057.1 | hsa-miR-182-3p | -0,04 | -0,32 |
| TOR1A        | ENST00000351698.4 | hsa-miR-182-3p | -0,04 | -0,44 |
| IPO5         | ENST00000261574.5 | hsa-miR-182-3p | -0,04 | -0,13 |
| RAB19        | ENST00000275874.5 | hsa-miR-182-3p | -0,04 | -0,17 |
| UHRF1BP1L    | ENST00000279907.7 | hsa-miR-182-3p | -0,04 | -0,07 |
| ZSCAN23      | ENST00000289788.4 | hsa-miR-182-3p | -0,04 | -0,04 |
| HIPK2        | ENST00000406875.3 | hsa-miR-182-3p | -0,04 | -0,04 |
| COL9A1       | ENST00000357250.6 | hsa-miR-182-3p | -0,04 | -0,07 |
| SUMF2        | ENST00000434526.2 | hsa-miR-182-3p | -0,04 | -0,04 |
| SEMA3E       | ENST00000307792.3 | hsa-miR-182-3p | -0,04 | -0,18 |
| PRSS21       | ENST00000455114.1 | hsa-miR-182-3p | -0,04 | -0,18 |
| VSTM4        | ENST00000332853.4 | hsa-miR-182-3p | -0,04 | -0,14 |
| CCDC142      | ENST00000393965.3 | hsa-miR-182-3p | -0,04 | -0,1  |
| RWDD1        | ENST00000466444.2 | hsa-miR-182-3p | -0,04 | -0,19 |
| ITGA10       | ENST00000369304.3 | hsa-miR-182-3p | -0,04 | -0,04 |
| NKD1         | ENST00000268459.3 | hsa-miR-182-3p | -0,04 | -0,08 |
| RETSAT       | ENST00000295802.4 | hsa-miR-182-3p | -0,04 | -0,04 |
| CLCN6        | ENST00000312413.6 | hsa-miR-182-3p | -0,04 | -0,04 |
| FAM135B      | ENST00000395297.1 | hsa-miR-182-3p | -0,04 | -0,04 |
| SAR1A        | ENST00000373242.2 | hsa-miR-182-3p | -0,04 | -0,39 |
| AGO3         | ENST00000373191.4 | hsa-miR-182-3p | -0,04 | -0,1  |
| PTPRF        | ENST00000372414.3 | hsa-miR-182-3p | -0,04 | -0,04 |
| HHIP         | ENST00000296575.3 | hsa-miR-182-3p | -0,04 | -0,1  |
| FRZB         | ENST00000295113.4 | hsa-miR-182-3p | -0,04 | -0,35 |
| RASAL1       | ENST00000546530.1 | hsa-miR-182-3p | -0,04 | -0,09 |
| DYNLL2       | ENST00000579991.2 | hsa-miR-182-3p | -0,04 | -0,2  |
| ROBO4        | ENST00000306534.3 | hsa-miR-182-3p | -0,04 | -0,04 |

|             |                   |                |       |       |
|-------------|-------------------|----------------|-------|-------|
| AGO4        | ENST00000373210.3 | hsa-miR-182-3p | -0,04 | -0,04 |
| TBR1        | ENST00000389554.3 | hsa-miR-182-3p | -0,04 | -0,04 |
| CNTN3       | ENST00000263665.6 | hsa-miR-182-3p | -0,04 | -0,21 |
| ACSS1       | ENST00000323482.4 | hsa-miR-182-3p | -0,04 | -0,04 |
| ADCY9       | ENST00000294016.3 | hsa-miR-182-3p | -0,04 | -0,05 |
| SDC2        | ENST00000302190.4 | hsa-miR-182-3p | -0,04 | -0,17 |
| ADNP        | ENST00000371602.4 | hsa-miR-182-3p | -0,04 | -0,14 |
| GUCY1A2     | ENST00000526355.2 | hsa-miR-182-3p | -0,04 | -0,18 |
| ZNF488      | ENST00000494156.1 | hsa-miR-182-3p | -0,04 | -0,04 |
| ATP8A2      | ENST00000381655.2 | hsa-miR-182-3p | -0,04 | -0,07 |
| ATXN7       | ENST00000295900.6 | hsa-miR-182-3p | -0,04 | -0,04 |
| CEP170      | ENST00000366542.1 | hsa-miR-182-3p | -0,04 | -0,04 |
| IL20RB      | ENST00000309741.5 | hsa-miR-182-3p | -0,04 | -0,04 |
| KIAA1549L   | ENST00000321505.4 | hsa-miR-182-3p | -0,04 | -0,04 |
| PRKAR1B     | ENST00000537384.1 | hsa-miR-182-3p | -0,03 | -0,04 |
| PDE12       | ENST00000311180.8 | hsa-miR-182-3p | -0,03 | -0,06 |
| GXYLT2      | ENST00000389617.4 | hsa-miR-182-3p | -0,03 | -0,11 |
| RRAGD       | ENST00000369415.4 | hsa-miR-182-3p | -0,03 | -0,41 |
| MFSD1       | ENST00000415822.2 | hsa-miR-182-3p | -0,03 | -0,25 |
| ARSE        | ENST00000540563.1 | hsa-miR-182-3p | -0,03 | -0,14 |
| ARMC8       | ENST00000469044.1 | hsa-miR-182-3p | -0,03 | -0,22 |
| CCDC50      | ENST00000392455.3 | hsa-miR-182-3p | -0,03 | -0,2  |
| NCAPG       | ENST00000251496.2 | hsa-miR-182-3p | -0,03 | -0,27 |
| RICTOR      | ENST00000357387.3 | hsa-miR-182-3p | -0,03 | -0,04 |
| HCN1        | ENST00000303230.4 | hsa-miR-182-3p | -0,03 | -0,16 |
| EFCAB14     | ENST00000371933.3 | hsa-miR-182-3p | -0,03 | -0,15 |
| TBC1D16     | ENST00000310924.2 | hsa-miR-182-3p | -0,03 | -0,04 |
| AC005606.1  | ENST00000598236.1 | hsa-miR-182-3p | -0,03 | -0,18 |
| FRK         | ENST00000606080.1 | hsa-miR-182-3p | -0,03 | -0,07 |
| SORCS2      | ENST00000507866.2 | hsa-miR-182-3p | -0,03 | -0,03 |
| MEAF6       | ENST00000373075.2 | hsa-miR-182-3p | -0,03 | -0,13 |
| RCC2        | ENST00000375436.4 | hsa-miR-182-3p | -0,03 | -0,03 |
| DISC1       | ENST00000439617.2 | hsa-miR-182-3p | -0,03 | -0,03 |
| TMEM184A    | ENST00000297477.5 | hsa-miR-182-3p | -0,03 | -0,04 |
| ABT1        | ENST00000274849.1 | hsa-miR-182-3p | -0,03 | -0,14 |
| RPL12       | ENST00000361436.5 | hsa-miR-182-3p | -0,03 | -0,06 |
| FBXO31      | ENST00000311635.7 | hsa-miR-182-3p | -0,03 | -0,09 |
| HEATR6      | ENST00000184956.6 | hsa-miR-182-3p | -0,03 | -0,15 |
| AC007040.11 | ENST00000606025.1 | hsa-miR-182-3p | -0,03 | -0,08 |
| ANAPC16     | ENST00000299381.4 | hsa-miR-182-3p | -0,03 | -0,17 |
| KIAA0930    | ENST00000336156.5 | hsa-miR-182-3p | -0,03 | -0,14 |
| NFATC3      | ENST00000329524.4 | hsa-miR-182-3p | -0,03 | -0,03 |
| SMUG1       | ENST00000505128.1 | hsa-miR-182-3p | -0,03 | -0,44 |
| DPP10       | ENST00000410059.1 | hsa-miR-182-3p | -0,03 | -0,03 |
| TMEM178B    | ENST00000565468.1 | hsa-miR-182-3p | -0,03 | -0,03 |
| IQSEC3      | ENST00000538872.1 | hsa-miR-182-3p | -0,03 | -0,03 |
| SPTLC3      | ENST00000399002.2 | hsa-miR-182-3p | -0,03 | -0,14 |
| FLJ27365    | ENST00000360737.3 | hsa-miR-182-3p | -0,03 | -0,03 |
| ACVRL1      | ENST00000550683.1 | hsa-miR-182-3p | -0,03 | -0,06 |
| PTPLAD2     | ENST00000495827.2 | hsa-miR-182-3p | -0,03 | -0,12 |
| SCUBE3      | ENST00000274938.7 | hsa-miR-182-3p | -0,03 | -0,06 |
| INPP5K      | ENST00000421807.2 | hsa-miR-182-3p | -0,03 | -0,15 |
| DMGDH       | ENST00000380311.4 | hsa-miR-182-3p | -0,03 | -0,1  |
| GBA         | ENST00000368373.3 | hsa-miR-182-3p | -0,03 | -0,04 |
| PTBP2       | ENST00000609116.1 | hsa-miR-182-3p | -0,03 | -0,07 |
| ARHGAP31    | ENST00000264245.4 | hsa-miR-182-3p | -0,03 | -0,1  |
| NETO2       | ENST00000562435.1 | hsa-miR-182-3p | -0,03 | -0,67 |
| SAP30BP     | ENST00000584667.1 | hsa-miR-182-3p | -0,03 | -0,15 |
| MAT1A       | ENST00000372213.3 | hsa-miR-182-3p | -0,03 | -0,16 |
| ZNRF1       | ENST00000335325.4 | hsa-miR-182-3p | -0,03 | -0,05 |
| ALDH5A1     | ENST00000357578.3 | hsa-miR-182-3p | -0,03 | -0,06 |
| CSNK1G1     | ENST00000303052.7 | hsa-miR-182-3p | -0,03 | -0,03 |
| BORA        | ENST00000390667.5 | hsa-miR-182-3p | -0,03 | -0,11 |
| PIFO        | ENST00000369738.4 | hsa-miR-182-3p | -0,03 | -0,14 |
| BLOC1S4     | ENST00000320776.3 | hsa-miR-182-3p | -0,03 | -0,27 |
| KDM5A       | ENST00000399788.2 | hsa-miR-182-3p | -0,03 | -0,04 |

|          |                   |                |       |       |
|----------|-------------------|----------------|-------|-------|
| PPARGC1B | ENST00000309241.5 | hsa-miR-182-3p | -0,03 | -0,04 |
| TUBB     | ENST00000327892.8 | hsa-miR-182-3p | -0,03 | -0,33 |
| LOH12CR1 | ENST00000314565.4 | hsa-miR-182-3p | -0,03 | -0,07 |
| DRP2     | ENST00000402866.1 | hsa-miR-182-3p | -0,03 | -0,03 |
| PRICKLE2 | ENST00000295902.6 | hsa-miR-182-3p | -0,03 | -0,03 |
| SHISA6   | ENST00000441885.3 | hsa-miR-182-3p | -0,03 | -0,03 |
| C1orf95  | ENST00000366788.3 | hsa-miR-182-3p | -0,03 | -0,14 |
| ZC3HAV1  | ENST00000242351.5 | hsa-miR-182-3p | -0,03 | -0,03 |
| RAD9B    | ENST00000409425.1 | hsa-miR-182-3p | -0,03 | -0,2  |
| PPM1A    | ENST00000395076.4 | hsa-miR-182-3p | -0,03 | -0,16 |
| WDYHV1   | ENST00000523984.1 | hsa-miR-182-3p | -0,03 | -0,21 |
| SAMD9    | ENST00000379958.2 | hsa-miR-182-3p | -0,03 | -0,06 |
| ZC3H4    | ENST00000253048.5 | hsa-miR-182-3p | -0,03 | -0,03 |
| NCR3LG1  | ENST00000338965.4 | hsa-miR-182-3p | -0,03 | -0,03 |
| NUCB2    | ENST00000529010.1 | hsa-miR-182-3p | -0,03 | -0,22 |
| TRAF6    | ENST00000526995.1 | hsa-miR-182-3p | -0,03 | -0,07 |
| UBXN7    | ENST00000296328.4 | hsa-miR-182-3p | -0,03 | -0,11 |
| GGACT    | ENST00000376250.2 | hsa-miR-182-3p | -0,03 | -0,11 |
| MUC19    | ENST00000454784.4 | hsa-miR-182-3p | -0,03 | -0,03 |
| LPP      | ENST00000312675.4 | hsa-miR-182-3p | -0,03 | -0,03 |
| NHS      | ENST00000380060.3 | hsa-miR-182-3p | -0,03 | -0,03 |
| CRTC3    | ENST00000420329.2 | hsa-miR-182-3p | -0,03 | -0,03 |
| PTPRT    | ENST00000373187.1 | hsa-miR-182-3p | -0,03 | -0,03 |
| STARD9   | ENST00000290607.7 | hsa-miR-182-3p | -0,03 | -0,03 |
| XYLT1    | ENST00000261381.6 | hsa-miR-182-3p | -0,03 | -0,03 |
| TMEM200C | ENST00000581347.2 | hsa-miR-182-3p | -0,03 | -0,29 |
| ZC3H12D  | ENST00000416573.2 | hsa-miR-182-3p | -0,03 | -0,03 |
| SLC24A2  | ENST00000341998.2 | hsa-miR-182-3p | -0,03 | -0,03 |
| PREX2    | ENST00000288368.4 | hsa-miR-182-3p | -0,03 | -0,03 |
| FAM58A   | ENST00000406277.2 | hsa-miR-182-3p | -0,03 | -0,24 |
| THUMPD3  | ENST00000345094.3 | hsa-miR-182-3p | -0,03 | -0,16 |
| MDGA1    | ENST00000297153.7 | hsa-miR-182-3p | -0,03 | -0,03 |
| HEG1     | ENST00000311127.4 | hsa-miR-182-3p | -0,03 | -0,03 |
| SPPL3    | ENST00000353487.2 | hsa-miR-182-3p | -0,03 | -0,07 |
| PPIL6    | ENST00000521072.2 | hsa-miR-182-3p | -0,03 | -0,26 |
| RPL27A   | ENST00000314138.6 | hsa-miR-182-3p | -0,03 | -0,28 |
| GPSM2    | ENST00000406462.2 | hsa-miR-182-3p | -0,03 | -0,1  |
| ZNF730   | ENST00000593635.1 | hsa-miR-182-3p | -0,03 | -0,08 |
| FOXI2    | ENST00000388920.4 | hsa-miR-182-3p | -0,03 | -0,03 |
| FAM53B   | ENST00000337318.3 | hsa-miR-182-3p | -0,03 | -0,03 |
| HECTD4   | ENST00000377560.5 | hsa-miR-182-3p | -0,03 | -0,03 |
| HHIPL1   | ENST00000330710.5 | hsa-miR-182-3p | -0,03 | -0,03 |
| STOX2    | ENST00000308497.4 | hsa-miR-182-3p | -0,03 | -0,03 |
| RPGRIP1L | ENST00000262135.4 | hsa-miR-182-3p | -0,03 | -0,07 |
| HEBP2    | ENST00000607197.1 | hsa-miR-182-3p | -0,03 | -0,14 |
| RBP2     | ENST00000232217.2 | hsa-miR-182-3p | -0,03 | -0,32 |
| LRRC3    | ENST00000291592.4 | hsa-miR-182-3p | -0,03 | -0,03 |
| CENPL    | ENST00000356198.2 | hsa-miR-182-3p | -0,03 | -0,2  |
| COQ7     | ENST00000321998.5 | hsa-miR-182-3p | -0,03 | -0,08 |
| TSN      | ENST00000536142.1 | hsa-miR-182-3p | -0,03 | -0,18 |
| CNIH1    | ENST00000395573.4 | hsa-miR-182-3p | -0,03 | -0,45 |
| MTUS2    | ENST00000431530.3 | hsa-miR-182-3p | -0,03 | -0,07 |
| ERLIN2   | ENST00000276461.5 | hsa-miR-182-3p | -0,03 | -0,03 |
| AHCYL2   | ENST00000325006.3 | hsa-miR-182-3p | -0,03 | -0,13 |
| ZNF780B  | ENST00000434248.1 | hsa-miR-182-3p | -0,03 | -0,15 |
| PCDH12   | ENST00000231484.3 | hsa-miR-182-3p | -0,03 | -0,03 |
| VASH1    | ENST00000167106.4 | hsa-miR-182-3p | -0,03 | -0,03 |
| TPCN1    | ENST00000335509.6 | hsa-miR-182-3p | -0,03 | -0,03 |
| DNAJC6   | ENST00000395325.3 | hsa-miR-182-3p | -0,03 | -0,03 |
| ZDHHC3   | ENST00000296127.3 | hsa-miR-182-3p | -0,03 | -0,12 |
| LONRF3   | ENST00000304778.7 | hsa-miR-182-3p | -0,03 | -0,07 |
| LSAMP    | ENST00000490035.2 | hsa-miR-182-3p | -0,03 | -0,11 |
| CTNNBIP1 | ENST00000377263.1 | hsa-miR-182-3p | -0,03 | -0,15 |
| TBC1D12  | ENST00000225235.4 | hsa-miR-182-3p | -0,03 | -0,04 |
| NFIC     | ENST00000346156.5 | hsa-miR-182-3p | -0,03 | -0,03 |
| SPATA18  | ENST00000295213.4 | hsa-miR-182-3p | -0,03 | -0,11 |

|          |                   |                |       |       |
|----------|-------------------|----------------|-------|-------|
| HSP90B1  | ENST00000299767.5 | hsa-miR-182-3p | -0,03 | -0,23 |
| LSG1     | ENST00000265245.5 | hsa-miR-182-3p | -0,03 | -0,04 |
| SNPH     | ENST00000381873.3 | hsa-miR-182-3p | -0,03 | -0,03 |
| CNOT6L   | ENST00000504123.1 | hsa-miR-182-3p | -0,03 | -0,12 |
| MLXIP    | ENST00000319080.7 | hsa-miR-182-3p | -0,03 | -0,03 |
| LRRRC28  | ENST00000301981.3 | hsa-miR-182-3p | -0,03 | -0,12 |
| CELF1    | ENST00000395290.2 | hsa-miR-182-3p | -0,03 | -0,03 |
| LCORL    | ENST00000326877.4 | hsa-miR-182-3p | -0,03 | -0,24 |
| CABLES2  | ENST00000279101.5 | hsa-miR-182-3p | -0,03 | -0,08 |
| NR3C1    | ENST00000394464.2 | hsa-miR-182-3p | -0,03 | -0,09 |
| NDUFAF5  | ENST00000378106.5 | hsa-miR-182-3p | -0,03 | -0,08 |
| NUDT16   | ENST00000359850.3 | hsa-miR-182-3p | -0,03 | -0,08 |
| GPATCH2  | ENST00000366935.3 | hsa-miR-182-3p | -0,03 | -0,15 |
| GIPR     | ENST00000590918.1 | hsa-miR-182-3p | -0,03 | -0,03 |
| INPP5F   | ENST00000361976.2 | hsa-miR-182-3p | -0,03 | -0,03 |
| GATAD2B  | ENST00000368655.4 | hsa-miR-182-3p | -0,03 | -0,11 |
| SPTLC2   | ENST00000216484.2 | hsa-miR-182-3p | -0,03 | -0,08 |
| KHNYN    | ENST00000251343.5 | hsa-miR-182-3p | -0,03 | -0,16 |
| SLC31A1  | ENST00000374212.4 | hsa-miR-182-3p | -0,03 | -0,24 |
| LAMTOR3  | ENST00000499666.2 | hsa-miR-182-3p | -0,03 | -0,23 |
| TMEM30A  | ENST00000230461.6 | hsa-miR-182-3p | -0,03 | -0,38 |
| SLC40A1  | ENST00000261024.2 | hsa-miR-182-3p | -0,03 | -0,13 |
| PIP4K2B  | ENST00000269554.3 | hsa-miR-182-3p | -0,03 | -0,03 |
| SMCR8    | ENST00000406438.3 | hsa-miR-182-3p | -0,03 | -0,03 |
| GLRX3    | ENST00000368644.1 | hsa-miR-182-3p | -0,03 | -0,06 |
| SAPCD2   | ENST00000409687.3 | hsa-miR-182-3p | -0,03 | -0,03 |
| LCA5     | ENST00000369846.4 | hsa-miR-182-3p | -0,03 | -0,03 |
| MAP3K2   | ENST00000409947.1 | hsa-miR-182-3p | -0,03 | -0,03 |
| POLR1A   | ENST00000263857.6 | hsa-miR-182-3p | -0,03 | -0,03 |
| ZNF573   | ENST00000590414.2 | hsa-miR-182-3p | -0,03 | -0,05 |
| SCN8A    | ENST00000354534.6 | hsa-miR-182-3p | -0,03 | -0,03 |
| FAM208B  | ENST00000328090.5 | hsa-miR-182-3p | -0,02 | -0,1  |
| TTF2     | ENST00000369466.4 | hsa-miR-182-3p | -0,02 | -0,06 |
| LBX1     | ENST00000370193.2 | hsa-miR-182-3p | -0,02 | -0,3  |
| TCEANC2  | ENST00000234827.1 | hsa-miR-182-3p | -0,02 | -0,13 |
| PAIP2B   | ENST00000244221.8 | hsa-miR-182-3p | -0,02 | -0,12 |
| TXNDC17  | ENST00000250101.5 | hsa-miR-182-3p | -0,02 | -0,34 |
| ARHGAP26 | ENST00000378004.3 | hsa-miR-182-3p | -0,02 | -0,04 |
| ADD2     | ENST00000264436.4 | hsa-miR-182-3p | -0,02 | -0,05 |
| ELP5     | ENST00000574993.1 | hsa-miR-182-3p | -0,02 | -0,11 |
| METTL14  | ENST00000388822.5 | hsa-miR-182-3p | -0,02 | -0,18 |
| PSMG1    | ENST00000331573.3 | hsa-miR-182-3p | -0,02 | -0,15 |
| TENM1    | ENST00000371130.3 | hsa-miR-182-3p | -0,02 | -0,02 |
| ANKRD9   | ENST00000559651.1 | hsa-miR-182-3p | -0,02 | -0,17 |
| MYO18B   | ENST00000335473.7 | hsa-miR-182-3p | -0,02 | -0,2  |
| PHF14    | ENST00000403050.3 | hsa-miR-182-3p | -0,02 | -0,12 |
| TBL3     | ENST00000568546.1 | hsa-miR-182-3p | -0,02 | -0,07 |
| LACE1    | ENST00000368977.4 | hsa-miR-182-3p | -0,02 | -0,07 |
| ATG14    | ENST00000247178.5 | hsa-miR-182-3p | -0,02 | -0,12 |
| SLC25A36 | ENST00000446041.2 | hsa-miR-182-3p | -0,02 | -0,07 |
| DIP2C    | ENST00000280886.6 | hsa-miR-182-3p | -0,02 | -0,03 |
| CLMN     | ENST00000298912.4 | hsa-miR-182-3p | -0,02 | -0,1  |
| NOL10    | ENST00000345985.3 | hsa-miR-182-3p | -0,02 | -0,07 |
| SPTSSA   | ENST00000298130.4 | hsa-miR-182-3p | -0,02 | -0,13 |
| CBX1     | ENST00000393408.3 | hsa-miR-182-3p | -0,02 | -0,12 |
| UQCC1    | ENST00000349714.5 | hsa-miR-182-3p | -0,02 | -0,13 |
| CNNM2    | ENST00000369878.4 | hsa-miR-182-3p | -0,02 | -0,06 |
| GLDN     | ENST00000335449.6 | hsa-miR-182-3p | -0,02 | -0,02 |
| ATP10A   | ENST00000356865.6 | hsa-miR-182-3p | -0,02 | -0,07 |
| CREBRF   | ENST00000540014.1 | hsa-miR-182-3p | -0,02 | -0,09 |
| LPPR5    | ENST00000370188.3 | hsa-miR-182-3p | -0,02 | -0,11 |
| EIF2AK2  | ENST00000233057.4 | hsa-miR-182-3p | -0,02 | -0,04 |
| AMDHD2   | ENST00000302956.4 | hsa-miR-182-3p | -0,02 | -0,06 |
| HSD17B12 | ENST00000278353.4 | hsa-miR-182-3p | -0,02 | -0,19 |
| P2RY6    | ENST00000393590.2 | hsa-miR-182-3p | -0,02 | -0,13 |
| MRPS5    | ENST00000272418.2 | hsa-miR-182-3p | -0,02 | -0,17 |

|            |                   |                |       |       |
|------------|-------------------|----------------|-------|-------|
| ITPRIP     | ENST00000337478.1 | hsa-miR-182-3p | -0,02 | -0,03 |
| SLC7A14    | ENST00000231706.5 | hsa-miR-182-3p | -0,02 | -0,02 |
| GLYCTK     | ENST00000354773.4 | hsa-miR-182-3p | -0,02 | -0,02 |
| FBXO48     | ENST00000377957.3 | hsa-miR-182-3p | -0,02 | -0,06 |
| GALNT6     | ENST00000543196.2 | hsa-miR-182-3p | -0,02 | -0,13 |
| ETNK1      | ENST00000266517.4 | hsa-miR-182-3p | -0,02 | -0,11 |
| RAD1       | ENST00000382038.2 | hsa-miR-182-3p | -0,02 | -0,11 |
| PNPLA4     | ENST00000381042.4 | hsa-miR-182-3p | -0,02 | -0,2  |
| PPIE       | ENST00000324379.5 | hsa-miR-182-3p | -0,02 | -0,6  |
| XPNPEP3    | ENST00000357137.4 | hsa-miR-182-3p | -0,02 | -0,22 |
| MYPN       | ENST00000358913.5 | hsa-miR-182-3p | -0,02 | -0,09 |
| FAM177A1   | ENST00000280987.4 | hsa-miR-182-3p | -0,02 | -0,21 |
| NF2        | ENST00000347330.5 | hsa-miR-182-3p | -0,02 | -0,03 |
| TTC39A     | ENST00000530004.1 | hsa-miR-182-3p | -0,02 | -0,27 |
| CYLD       | ENST00000540145.1 | hsa-miR-182-3p | -0,02 | -0,09 |
| TRIM24     | ENST00000343526.4 | hsa-miR-182-3p | -0,02 | -0,11 |
| VPS53      | ENST00000437048.2 | hsa-miR-182-3p | -0,02 | -0,08 |
| MAP9       | ENST00000311277.4 | hsa-miR-182-3p | -0,02 | -0,09 |
| SPEG       | ENST00000312358.7 | hsa-miR-182-3p | -0,02 | -0,02 |
| KIF6       | ENST00000287152.7 | hsa-miR-182-3p | -0,02 | -0,05 |
| SEC22A     | ENST00000481965.2 | hsa-miR-182-3p | -0,02 | -0,17 |
| FMNL3      | ENST00000335154.5 | hsa-miR-182-3p | -0,02 | -0,08 |
| SYNRG      | ENST00000339208.6 | hsa-miR-182-3p | -0,02 | -0,04 |
| SYT7       | ENST00000263846.4 | hsa-miR-182-3p | -0,02 | -0,15 |
| FAM134A    | ENST00000430297.2 | hsa-miR-182-3p | -0,02 | -0,36 |
| ZNF778     | ENST00000433976.2 | hsa-miR-182-3p | -0,02 | -0,04 |
| C1GALT1    | ENST00000223122.3 | hsa-miR-182-3p | -0,02 | -0,09 |
| C5orf63    | ENST00000535381.1 | hsa-miR-182-3p | -0,02 | -0,18 |
| TEAD1      | ENST00000361905.4 | hsa-miR-182-3p | -0,02 | -0,02 |
| LRIG2      | ENST00000361127.5 | hsa-miR-182-3p | -0,02 | -0,02 |
| DDX3X      | ENST00000399959.2 | hsa-miR-182-3p | -0,02 | -0,08 |
| C15orf38   | ENST00000357484.5 | hsa-miR-182-3p | -0,02 | -0,16 |
| MRRF       | ENST00000344641.3 | hsa-miR-182-3p | -0,02 | -0,13 |
| EPC1       | ENST00000319778.6 | hsa-miR-182-3p | -0,02 | -0,13 |
| AQP2       | ENST00000199280.3 | hsa-miR-182-3p | -0,02 | -0,02 |
| CACNA2D4   | ENST00000382722.5 | hsa-miR-182-3p | -0,02 | -0,02 |
| ETV3       | ENST00000368192.4 | hsa-miR-182-3p | -0,02 | -0,02 |
| GPR180     | ENST00000376958.4 | hsa-miR-182-3p | -0,02 | -0,08 |
| NOX5       | ENST00000260364.5 | hsa-miR-182-3p | -0,02 | -0,02 |
| WNT4       | ENST00000290167.6 | hsa-miR-182-3p | -0,02 | -0,02 |
| SDK2       | ENST00000392650.3 | hsa-miR-182-3p | -0,02 | -0,02 |
| KIAA2018   | ENST00000316407.4 | hsa-miR-182-3p | -0,02 | -0,02 |
| ABCA1      | ENST00000374736.3 | hsa-miR-182-3p | -0,02 | -0,02 |
| BEND3      | ENST00000369042.1 | hsa-miR-182-3p | -0,02 | -0,02 |
| KCNAB2     | ENST00000378097.1 | hsa-miR-182-3p | -0,02 | -0,02 |
| NFASC      | ENST00000401399.1 | hsa-miR-182-3p | -0,02 | -0,02 |
| SAMD12     | ENST00000409003.4 | hsa-miR-182-3p | -0,02 | -0,02 |
| ZNF862     | ENST00000223210.4 | hsa-miR-182-3p | -0,02 | -0,02 |
| ATP1B4     | ENST00000218008.3 | hsa-miR-182-3p | -0,02 | -0,02 |
| TECPR1     | ENST00000447648.2 | hsa-miR-182-3p | -0,02 | -0,02 |
| LZTS3      | ENST00000329152.3 | hsa-miR-182-3p | -0,02 | -0,02 |
| PDE11A     | ENST00000286063.6 | hsa-miR-182-3p | -0,02 | -0,02 |
| CARD14     | ENST00000573882.1 | hsa-miR-182-3p | -0,02 | -0,02 |
| FAT3       | ENST00000298047.6 | hsa-miR-182-3p | -0,02 | -0,02 |
| APLF       | ENST00000303795.4 | hsa-miR-182-3p | -0,02 | -0,09 |
| AFF1       | ENST00000395146.4 | hsa-miR-182-3p | -0,02 | -0,05 |
| PYGO2      | ENST00000368457.2 | hsa-miR-182-3p | -0,02 | -0,08 |
| GSE1       | ENST00000253458.7 | hsa-miR-182-3p | -0,02 | -0,02 |
| KMT2A      | ENST00000534358.1 | hsa-miR-182-3p | -0,02 | -0,02 |
| C17orf51   | ENST00000391411.5 | hsa-miR-182-3p | -0,02 | -0,05 |
| ST6GALNAC5 | ENST00000477717.1 | hsa-miR-182-3p | -0,02 | -0,06 |
| CYP1B1     | ENST00000260630.3 | hsa-miR-182-3p | -0,02 | -0,13 |
| OSBPL8     | ENST00000393249.2 | hsa-miR-182-3p | -0,02 | -0,1  |
| BID        | ENST00000317361.7 | hsa-miR-182-3p | -0,02 | -0,19 |
| FBXO41     | ENST00000295133.5 | hsa-miR-182-3p | -0,02 | -0,02 |
| PIK3CA     | ENST00000263967.3 | hsa-miR-182-3p | -0,02 | -0,3  |

|          |                   |                |       |       |
|----------|-------------------|----------------|-------|-------|
| DHX33    | ENST00000225296.3 | hsa-miR-182-3p | -0,02 | -0,02 |
| SPA17    | ENST00000532692.1 | hsa-miR-182-3p | -0,02 | -0,16 |
| RAB14    | ENST00000373840.4 | hsa-miR-182-3p | -0,02 | -0,05 |
| CCL1     | ENST00000225842.3 | hsa-miR-182-3p | -0,02 | -0,15 |
| RPH3A    | ENST00000415485.3 | hsa-miR-182-3p | -0,02 | -0,02 |
| FAM204A  | ENST00000369183.4 | hsa-miR-182-3p | -0,02 | -0,25 |
| CPLX1    | ENST00000304062.6 | hsa-miR-182-3p | -0,02 | -0,11 |
| ZBTB17   | ENST00000375743.4 | hsa-miR-182-3p | -0,02 | -0,14 |
| ANKS6    | ENST00000375018.1 | hsa-miR-182-3p | -0,02 | -0,03 |
| KCTD16   | ENST00000507359.3 | hsa-miR-182-3p | -0,02 | -0,1  |
| UVRAG    | ENST00000356136.3 | hsa-miR-182-3p | -0,02 | -0,04 |
| ACOX1    | ENST00000293217.5 | hsa-miR-182-3p | -0,02 | -0,02 |
| LHX4     | ENST00000263726.2 | hsa-miR-182-3p | -0,02 | -0,05 |
| SGPL1    | ENST00000373202.3 | hsa-miR-182-3p | -0,02 | -0,07 |
| SFT2D3   | ENST00000310981.4 | hsa-miR-182-3p | -0,02 | -0,18 |
| SMURF1   | ENST00000361368.2 | hsa-miR-182-3p | -0,02 | -0,07 |
| SLC25A21 | ENST00000331299.5 | hsa-miR-182-3p | -0,02 | -0,19 |
| KLHL38   | ENST00000325995.7 | hsa-miR-182-3p | -0,02 | -0,06 |
| ULK1     | ENST00000321867.4 | hsa-miR-182-3p | -0,02 | -0,02 |
| NOVA2    | ENST00000263257.5 | hsa-miR-182-3p | -0,02 | -0,03 |
| WDR70    | ENST00000265107.4 | hsa-miR-182-3p | -0,02 | -0,03 |
| SEMA3A   | ENST00000265362.4 | hsa-miR-182-3p | -0,02 | -0,13 |
| EPHA6    | ENST00000470610.2 | hsa-miR-182-3p | -0,02 | -0,23 |
| GTPBP10  | ENST00000222511.6 | hsa-miR-182-3p | -0,02 | -0,15 |
| SPRED3   | ENST00000587013.1 | hsa-miR-182-3p | -0,02 | -0,02 |
| SDK1     | ENST00000404826.2 | hsa-miR-182-3p | -0,02 | -0,02 |
| ZNF394   | ENST00000426306.2 | hsa-miR-182-3p | -0,02 | -0,11 |
| RANBP3   | ENST00000439268.2 | hsa-miR-182-3p | -0,02 | -0,06 |
| AKAP8    | ENST00000269701.2 | hsa-miR-182-3p | -0,02 | -0,18 |
| ZDHHC21  | ENST00000380916.4 | hsa-miR-182-3p | -0,02 | -0,17 |
| CNKSR3   | ENST00000607772.1 | hsa-miR-182-3p | -0,02 | -0,35 |
| SPATS2   | ENST00000553127.1 | hsa-miR-182-3p | -0,02 | -0,12 |
| SFXN5    | ENST00000410065.1 | hsa-miR-182-3p | -0,02 | -0,04 |
| EGFR     | ENST00000275493.2 | hsa-miR-182-3p | -0,02 | -0,02 |
| TEP1     | ENST00000262715.5 | hsa-miR-182-3p | -0,02 | -0,05 |
| PLXDC1   | ENST00000315392.4 | hsa-miR-182-3p | -0,02 | -0,03 |
| ZNF652   | ENST00000362063.2 | hsa-miR-182-3p | -0,02 | -0,11 |
| ADAMTS9  | ENST00000295903.4 | hsa-miR-182-3p | -0,02 | -0,02 |
| DNAJB13  | ENST00000339764.1 | hsa-miR-182-3p | -0,02 | -0,07 |
| FRMD5    | ENST00000484674.1 | hsa-miR-182-3p | -0,02 | -0,04 |
| PRDM6    | ENST00000407847.4 | hsa-miR-182-3p | -0,02 | -0,02 |
| PTRH1    | ENST00000423807.1 | hsa-miR-182-3p | -0,02 | -0,22 |
| MYO6     | ENST00000369981.3 | hsa-miR-182-3p | -0,02 | -0,13 |
| CARHSP1  | ENST00000396593.2 | hsa-miR-182-3p | -0,02 | -0,08 |
| PPM1H    | ENST00000228705.6 | hsa-miR-182-3p | -0,02 | -0,09 |
| PTBP3    | ENST00000374257.1 | hsa-miR-182-3p | -0,02 | -0,05 |
| ENY2     | ENST00000520147.1 | hsa-miR-182-3p | -0,02 | -0,1  |
| G3BP1    | ENST00000394123.3 | hsa-miR-182-3p | -0,02 | -0,07 |
| SVIP     | ENST00000354193.4 | hsa-miR-182-3p | -0,02 | -0,36 |
| IVNS1ABP | ENST00000367498.3 | hsa-miR-182-3p | -0,02 | -0,15 |
| INSIG2   | ENST00000245787.4 | hsa-miR-182-3p | -0,02 | -0,28 |
| CERS5    | ENST00000317551.6 | hsa-miR-182-3p | -0,02 | -0,18 |
| MRPS30   | ENST00000507110.1 | hsa-miR-182-3p | -0,02 | -0,34 |
| TMEM110  | ENST00000355083.5 | hsa-miR-182-3p | -0,02 | -0,03 |
| GLIS2    | ENST00000262366.3 | hsa-miR-182-3p | -0,02 | -0,02 |
| MRC2     | ENST00000303375.5 | hsa-miR-182-3p | -0,02 | -0,02 |
| ABCF2    | ENST00000287844.2 | hsa-miR-182-3p | -0,02 | -0,2  |
| ZNF326   | ENST00000370447.3 | hsa-miR-182-3p | -0,02 | -0,12 |
| HIP1     | ENST00000336926.6 | hsa-miR-182-3p | -0,02 | -0,02 |
| DRG1     | ENST00000331457.4 | hsa-miR-182-3p | -0,02 | -0,15 |
| UBA52    | ENST00000442744.2 | hsa-miR-182-3p | -0,02 | -0,19 |
| RYK      | ENST00000296084.4 | hsa-miR-182-3p | -0,02 | -0,07 |
| NT5C3B   | ENST00000269534.8 | hsa-miR-182-3p | -0,02 | -0,29 |
| CSPP1    | ENST00000262210.5 | hsa-miR-182-3p | -0,02 | -0,08 |
| ITGA1    | ENST00000282588.6 | hsa-miR-182-3p | -0,02 | -0,04 |
| CCDC93   | ENST00000376300.2 | hsa-miR-182-3p | -0,02 | -0,24 |

|          |                   |                |       |       |
|----------|-------------------|----------------|-------|-------|
| FAM83F   | ENST00000333407.6 | hsa-miR-182-3p | -0,01 | -0,01 |
| UGT3A1   | ENST00000274278.3 | hsa-miR-182-3p | -0,01 | -0,1  |
| SIKE1    | ENST00000369528.5 | hsa-miR-182-3p | -0,01 | -0,17 |
| MRPS14   | ENST00000476371.1 | hsa-miR-182-3p | -0,01 | -0,39 |
| CACNB4   | ENST00000539935.1 | hsa-miR-182-3p | -0,01 | -0,07 |
| YIPF4    | ENST00000238831.4 | hsa-miR-182-3p | -0,01 | -0,03 |
| RBM28    | ENST00000223073.2 | hsa-miR-182-3p | -0,01 | -0,05 |
| STOML1   | ENST00000564777.1 | hsa-miR-182-3p | -0,01 | -0,02 |
| CLDN19   | ENST00000296387.1 | hsa-miR-182-3p | -0,01 | -0,11 |
| MR1      | ENST00000367580.5 | hsa-miR-182-3p | -0,01 | -0,08 |
| ZNF274   | ENST00000326804.4 | hsa-miR-182-3p | -0,01 | -0,15 |
| SLC2A11  | ENST00000345044.6 | hsa-miR-182-3p | -0,01 | -0,14 |
| SHROOM3  | ENST00000296043.6 | hsa-miR-182-3p | -0,01 | -0,03 |
| RAB11A   | ENST00000569896.1 | hsa-miR-182-3p | -0,01 | -0,23 |
| NAA60    | ENST00000610180.1 | hsa-miR-182-3p | -0,01 | -0,01 |
| TCF21    | ENST00000367882.4 | hsa-miR-182-3p | -0,01 | -0,13 |
| PHC3     | ENST00000495893.2 | hsa-miR-182-3p | -0,01 | -0,05 |
| ARL2BP   | ENST00000219204.3 | hsa-miR-182-3p | -0,01 | -0,2  |
| ATRX     | ENST00000373344.5 | hsa-miR-182-3p | -0,01 | -0,02 |
| ATP6V0A2 | ENST00000330342.3 | hsa-miR-182-3p | -0,01 | -0,13 |
| KIAA0408 | ENST00000483725.3 | hsa-miR-182-3p | -0,01 | -0,04 |
| AFF2     | ENST00000370460.2 | hsa-miR-182-3p | -0,01 | -0,02 |
| CBLB     | ENST00000264122.4 | hsa-miR-182-3p | -0,01 | -0,07 |
| RAP1GAP2 | ENST00000254695.8 | hsa-miR-182-3p | -0,01 | -0,02 |
| SMAD2    | ENST00000262160.6 | hsa-miR-182-3p | -0,01 | -0,15 |
| CCDC127  | ENST00000296824.3 | hsa-miR-182-3p | -0,01 | -0,09 |
| ACPL2    | ENST00000286353.4 | hsa-miR-182-3p | -0,01 | -0,21 |
| FGF12    | ENST00000445105.2 | hsa-miR-182-3p | -0,01 | -0,13 |
| TTC26    | ENST00000430935.1 | hsa-miR-182-3p | -0,01 | -0,02 |
| FMN1     | ENST00000334528.9 | hsa-miR-182-3p | -0,01 | -0,07 |
| UMPS     | ENST00000232607.2 | hsa-miR-182-3p | -0,01 | -0,08 |
| LPIN2    | ENST00000261596.4 | hsa-miR-182-3p | -0,01 | -0,01 |
| SNX27    | ENST00000368843.3 | hsa-miR-182-3p | -0,01 | -0,01 |
| AMD1     | ENST00000368885.3 | hsa-miR-182-3p | -0,01 | -0,07 |
| NCAPH    | ENST00000240423.4 | hsa-miR-182-3p | -0,01 | -0,3  |
| FOSL2    | ENST00000379619.1 | hsa-miR-182-3p | -0,01 | -0,16 |
| KLHDC7B  | ENST00000395676.2 | hsa-miR-182-3p | -0,01 | -0,02 |
| SIRT5    | ENST00000606117.1 | hsa-miR-182-3p | -0,01 | -0,03 |
| MSH6     | ENST00000234420.5 | hsa-miR-182-3p | -0,01 | -0,17 |
| CHRM3    | ENST00000255380.4 | hsa-miR-182-3p | -0,01 | -0,06 |
| DONSON   | ENST00000453626.1 | hsa-miR-182-3p | -0,01 | -0,19 |
| PDIA3    | ENST00000300289.5 | hsa-miR-182-3p | -0,01 | -0,4  |
| PGR      | ENST00000325455.5 | hsa-miR-182-3p | -0,01 | -0,02 |
| UBE2F    | ENST00000272930.4 | hsa-miR-182-3p | -0,01 | -0,22 |
| TSPAN2   | ENST00000369516.2 | hsa-miR-182-3p | -0,01 | -0,07 |
| NMT1     | ENST00000592782.1 | hsa-miR-182-3p | -0,01 | -0,01 |
| RAB23    | ENST00000317483.3 | hsa-miR-182-3p | -0,01 | -0,16 |
| GNL1     | ENST00000376621.3 | hsa-miR-182-3p | -0,01 | -0,07 |
| RNF115   | ENST00000369291.5 | hsa-miR-182-3p | -0,01 | -0,1  |
| MCMBP    | ENST00000360003.3 | hsa-miR-182-3p | -0,01 | -0,16 |
| IRF2BP2  | ENST00000366610.3 | hsa-miR-182-3p | -0,01 | -0,12 |
| TMEM53   | ENST00000372237.3 | hsa-miR-182-3p | -0,01 | -0,14 |
| RAB6B    | ENST00000285208.4 | hsa-miR-182-3p | -0,01 | -0,16 |
| KLF11    | ENST00000305883.1 | hsa-miR-182-3p | -0,01 | -0,07 |
| BPTF     | ENST00000321892.4 | hsa-miR-182-3p | -0,01 | -0,05 |
| IKZF1    | ENST00000331340.3 | hsa-miR-182-3p | -0,01 | -0,01 |
| TFAP2B   | ENST00000393655.3 | hsa-miR-182-3p | -0,01 | -0,06 |
| DUSP11   | ENST00000272444.3 | hsa-miR-182-3p | -0,01 | -0,3  |
| THAP2    | ENST00000308086.2 | hsa-miR-182-3p | -0,01 | -0,06 |
| OLFM2    | ENST00000264833.4 | hsa-miR-182-3p | -0,01 | -0,09 |
| PAPLN    | ENST00000381166.3 | hsa-miR-182-3p | -0,01 | -0,04 |
| STAMBP   | ENST00000394070.2 | hsa-miR-182-3p | -0,01 | -0,11 |
| IRAK3    | ENST00000261233.4 | hsa-miR-182-3p | -0,01 | -0,03 |
| NIPA2    | ENST00000337451.3 | hsa-miR-182-3p | -0,01 | -0,2  |
| JAG2     | ENST00000331782.3 | hsa-miR-182-3p | -0,01 | -0,16 |
| PSMB9    | ENST00000395330.1 | hsa-miR-182-3p | -0,01 | -0,29 |



|          |                   |                |       |       |
|----------|-------------------|----------------|-------|-------|
| SCN9A    | ENST00000409672.1 | hsa-miR-182-3p | -0,01 | -0,13 |
| C6orf223 | ENST00000439969.2 | hsa-miR-182-3p | -0,01 | -0,03 |
| CLVS2    | ENST00000275162.5 | hsa-miR-182-3p | -0,01 | -0,03 |
| MMADHC   | ENST00000303319.5 | hsa-miR-182-3p | -0,01 | -0,13 |
| TMOD2    | ENST00000249700.4 | hsa-miR-182-3p | -0,01 | -0,01 |
| ADAMTS2  | ENST00000251582.7 | hsa-miR-182-3p | -0,01 | -0,01 |
| FBXO25   | ENST00000276326.5 | hsa-miR-182-3p | -0,01 | -0,18 |
| SOX6     | ENST00000316399.6 | hsa-miR-182-3p | -0,01 | -0,03 |
| CRKL     | ENST00000354336.3 | hsa-miR-182-3p | -0,01 | -0,01 |
| SRD5A3   | ENST00000264228.4 | hsa-miR-182-3p | -0,01 | -0,19 |
| CTSB     | ENST00000353047.6 | hsa-miR-182-3p | -0,01 | -0,16 |
| SLC14A1  | ENST00000321925.4 | hsa-miR-182-3p | -0,01 | -0,09 |
| ZMIZ2    | ENST00000309315.4 | hsa-miR-182-3p | -0,01 | -0,03 |
| GABRQ    | ENST00000370306.2 | hsa-miR-182-3p | -0,01 | -0,03 |
| SH3BP2   | ENST00000356331.5 | hsa-miR-182-3p | -0,01 | -0,04 |
| PSMC4    | ENST00000157812.2 | hsa-miR-182-3p | -0,01 | -0,2  |
| COX5A    | ENST00000322347.6 | hsa-miR-182-3p | -0,01 | -0,39 |
| MESDC2   | ENST00000261758.4 | hsa-miR-182-3p | -0,01 | -0,11 |
| EIF4EBP3 | ENST00000310331.2 | hsa-miR-182-3p | -0,01 | -0,25 |
| ABCG8    | ENST00000272286.2 | hsa-miR-182-3p | -0,01 | -0,09 |
| STRBP    | ENST00000447404.2 | hsa-miR-182-3p | -0,01 | -0,1  |
| FAM26E   | ENST00000368599.3 | hsa-miR-182-3p | -0,01 | -0,07 |
| IER3IP1  | ENST00000256433.3 | hsa-miR-182-3p | -0,01 | -0,1  |
| TGFBR1   | ENST00000374994.4 | hsa-miR-182-3p | -0,01 | -0,11 |
| IFNAR2   | ENST00000404220.3 | hsa-miR-182-3p | -0,01 | -0,02 |
| CACNA1I  | ENST00000402142.3 | hsa-miR-182-3p | -0,01 | -0,01 |
| SLC36A1  | ENST00000243389.3 | hsa-miR-182-3p | -0,01 | -0,01 |
| NR3C2    | ENST00000344721.4 | hsa-miR-182-3p | -0,01 | -0,01 |
| ARHGEF4  | ENST00000392953.3 | hsa-miR-182-3p | -0,01 | -0,01 |
| PPFIA4   | ENST00000447715.2 | hsa-miR-182-3p | -0,01 | -0,01 |
| ATXN1L   | ENST00000427980.2 | hsa-miR-182-3p | -0,01 | -0,01 |
| REXO1L1  | ENST00000379010.2 | hsa-miR-182-3p | -0,01 | -0,01 |
| CACNG8   | ENST00000270458.2 | hsa-miR-182-3p | -0,01 | -0,01 |
| LMX1B    | ENST00000355497.5 | hsa-miR-182-3p | -0,01 | -0,01 |
| EP400    | ENST00000333577.4 | hsa-miR-182-3p | -0,01 | -0,01 |
| KIAA1755 | ENST00000279024.4 | hsa-miR-182-3p | -0,01 | -0,01 |
| HAS3     | ENST00000306560.1 | hsa-miR-182-3p | -0,01 | -0,01 |
| HIVEP3   | ENST00000372583.1 | hsa-miR-182-3p | -0,01 | -0,01 |
| KCNN3    | ENST00000271915.4 | hsa-miR-182-3p | -0,01 | -0,01 |
| MICAL3   | ENST00000441493.2 | hsa-miR-182-3p | -0,01 | -0,01 |
| NT5C1A   | ENST00000235628.1 | hsa-miR-182-3p | -0,01 | -0,01 |
| CTDSP1   | ENST00000273062.2 | hsa-miR-182-3p | -0,01 | -0,01 |
| PTPRS    | ENST00000372412.4 | hsa-miR-182-3p | -0,01 | -0,01 |
| CDON     | ENST00000392693.3 | hsa-miR-182-3p | -0,01 | -0,1  |
| C14orf37 | ENST00000267485.7 | hsa-miR-182-3p | -0,01 | -0,05 |
| NR6A1    | ENST00000487099.2 | hsa-miR-182-3p | -0,01 | -0,01 |
| SCARB2   | ENST00000264896.2 | hsa-miR-182-3p | -0,01 | -0,26 |
| EPB41L4B | ENST00000374557.4 | hsa-miR-182-3p | -0,01 | -0,11 |
| UCHL5    | ENST00000367455.4 | hsa-miR-182-3p | -0,01 | -0,17 |
| SAR1B    | ENST00000402673.2 | hsa-miR-182-3p | -0,01 | -0,34 |
| RABGGTB  | ENST00000319942.3 | hsa-miR-182-3p | -0,01 | -0,27 |
| ERC1     | ENST00000355446.5 | hsa-miR-182-3p | -0,01 | -0,01 |
| SH3GLB1  | ENST00000370558.4 | hsa-miR-182-3p | -0,01 | -0,19 |
| ADRBK2   | ENST00000324198.6 | hsa-miR-182-3p | -0,01 | -0,07 |
| SLC6A6   | ENST00000454876.2 | hsa-miR-182-3p | -0,01 | -0,01 |
| RNF11    | ENST00000242719.3 | hsa-miR-182-3p | -0,01 | -0,19 |
| FAM149B1 | ENST00000242505.6 | hsa-miR-182-3p | -0,01 | -0,06 |
| KNTC1    | ENST00000537348.1 | hsa-miR-182-3p | -0,01 | -0,17 |
| ZNF426   | ENST00000253115.2 | hsa-miR-182-3p | -0,01 | -0,04 |
| DCPS     | ENST00000263579.4 | hsa-miR-182-3p | -0,01 | -0,03 |
| SOX11    | ENST00000322002.3 | hsa-miR-182-3p | -0,01 | -0,05 |
| TMEM11   | ENST00000317635.5 | hsa-miR-182-3p | -0,01 | -0,1  |
| GRID1    | ENST00000327946.7 | hsa-miR-182-3p | -0,01 | -0,09 |
| KLHL20   | ENST00000209884.4 | hsa-miR-182-3p | -0,01 | -0,27 |
| TM9SF3   | ENST00000371142.4 | hsa-miR-182-3p | -0,01 | -0,05 |
| SLC46A1  | ENST00000440501.1 | hsa-miR-182-3p | -0,01 | -0,01 |

|            |                    |                |       |       |
|------------|--------------------|----------------|-------|-------|
| WDFY2      | ENST00000298125.5  | hsa-miR-182-3p | -0,01 | -0,07 |
| MYO1A      | ENST00000300119.3  | hsa-miR-182-3p | -0,01 | -0,02 |
| PTPN3      | ENST00000412145.1  | hsa-miR-182-3p | -0,01 | -0,02 |
| BACH2      | ENST00000257749.4  | hsa-miR-182-3p | -0,01 | -0,01 |
| ADAM23     | ENST00000264377.3  | hsa-miR-182-3p | -0,01 | -0,02 |
| ALG9       | ENST00000531154.1  | hsa-miR-182-3p | -0,01 | -0,12 |
| DDX20      | ENST00000369702.4  | hsa-miR-182-3p | -0,01 | -0,04 |
| FXN        | ENST00000396366.2  | hsa-miR-182-3p | -0,01 | -0,06 |
| KDM5B      | ENST00000367265.3  | hsa-miR-182-3p | -0,01 | -0,06 |
| RGS5       | ENST00000313961.5  | hsa-miR-182-3p | -0,01 | -0,07 |
| ADSL       | ENST00000216194.7  | hsa-miR-182-3p | -0,01 | -0,17 |
| TMED7      | ENST00000456936.3  | hsa-miR-182-3p | -0,01 | -0,1  |
| SOGA3      | ENST00000556132.1  | hsa-miR-182-3p | -0,01 | -0,02 |
| CDC42EP4   | ENST00000335793.3  | hsa-miR-182-3p | -0,01 | -0,12 |
| SOWAHC     | ENST00000356454.3  | hsa-miR-182-3p | -0,01 | -0,01 |
| ZC3H10     | ENST00000257940.2  | hsa-miR-182-3p | -0,01 | -0,09 |
| EC11       | ENST00000301729.4  | hsa-miR-182-3p | -0,01 | -0,26 |
| FZD3       | ENST00000240093.3  | hsa-miR-182-3p | -0,01 | -0,01 |
| RRP8       | ENST00000254605.6  | hsa-miR-182-3p | -0,01 | -0,14 |
| LGALS8     | ENST00000526589.1  | hsa-miR-182-3p | -0,01 | -0,08 |
| ESRP2      | ENST00000565858.1  | hsa-miR-182-3p | -0,01 | -0,14 |
| NUDT3      | ENST00000607016.1  | hsa-miR-182-3p | -0,01 | -0,02 |
| RRP15      | ENST00000366932.3  | hsa-miR-182-3p | -0,01 | -0,04 |
| WIPF1      | ENST00000392547.2  | hsa-miR-182-3p | -0,01 | -0,04 |
| PHF3       | ENST00000262043.3  | hsa-miR-182-3p | -0,01 | -0,17 |
| NFE2L3     | ENST0000056233.3   | hsa-miR-182-3p | -0,01 | -0,14 |
| EEFSEC     | ENST00000483457.1  | hsa-miR-182-3p | -0,01 | -0,15 |
| MED1       | ENST00000300651.6  | hsa-miR-182-3p | -0,01 | -0,01 |
| FBXW2      | ENST00000608872.1  | hsa-miR-182-3p | -0,01 | -0,07 |
| RPAP2      | ENST00000610020.1  | hsa-miR-182-3p | -0,01 | -0,32 |
| IFRD1      | ENST00000403825.3  | hsa-miR-182-3p | -0,01 | -0,3  |
| USP47      | ENST00000339865.5  | hsa-miR-182-3p | -0,01 | -0,06 |
| CENPF      | ENST00000366955.3  | hsa-miR-182-3p | -0,01 | -0,1  |
| SLC35F5    | ENST00000245680.2  | hsa-miR-182-3p | -0,01 | -0,15 |
| IRS1       | ENST00000305123.5  | hsa-miR-182-3p | -0,01 | -0,03 |
| TMED5      | ENST00000479918.1  | hsa-miR-182-3p | -0,01 | -0,06 |
| TRPC4      | ENST00000379705.3  | hsa-miR-182-3p | -0,01 | -0,07 |
| PDXK       | ENST00000468090.1  | hsa-miR-182-3p | -0,01 | -0,04 |
| MARCH7     | ENST00000259050.4  | hsa-miR-182-3p | -0,01 | -0,12 |
| AGMAT      | ENST00000375826.3  | hsa-miR-182-3p | -0,01 | -0,25 |
| SSR1       | ENST00000244763.4  | hsa-miR-182-3p | -0,01 | -0,2  |
| ROCK2      | ENST00000315872.6  | hsa-miR-182-3p | -0,01 | -0,03 |
| LSM3       | ENST00000306024.3  | hsa-miR-182-3p | -0,01 | -0,12 |
| ZNF189     | ENST00000374861.3  | hsa-miR-182-3p | -0,01 | -0,15 |
| ERVMER34-1 | ENST00000443173.1  | hsa-miR-182-3p | -0,01 | -0,07 |
| ERCC6      | ENST00000355832.5  | hsa-miR-182-3p | -0,01 | -0,11 |
| SIPA1L2    | ENST00000366630.1  | hsa-miR-182-3p | -0,01 | -0,17 |
| ARPC2      | ENST00000295685.10 | hsa-miR-182-3p | -0,01 | -0,03 |
| ZNF324     | ENST00000536459.2  | hsa-miR-182-3p | -0,01 | -0,06 |
| SCIN       | ENST00000297029.5  | hsa-miR-182-3p | -0,01 | -0,08 |
| ALG11      | ENST00000523764.1  | hsa-miR-182-3p | -0,01 | -0,19 |
| RHBDL3     | ENST00000269051.4  | hsa-miR-182-3p | -0,01 | -0,07 |
| FARP1      | ENST00000595437.1  | hsa-miR-182-3p | -0,01 | -0,07 |
| VSNL1      | ENST00000406397.1  | hsa-miR-182-3p | -0,01 | -0,32 |
| GALNT1     | ENST00000269195.5  | hsa-miR-182-3p | -0,01 | -0,18 |
| SESN3      | ENST00000536441.1  | hsa-miR-182-3p | -0,01 | -0,12 |
| MYO9A      | ENST00000564571.1  | hsa-miR-182-3p | -0,01 | -0,01 |
| ZNF285     | ENST00000330997.4  | hsa-miR-182-3p | -0,01 | -0,02 |
| ZNF404     | ENST00000587539.1  | hsa-miR-182-3p | -0,01 | -0,19 |
| SLC35C2    | ENST00000372227.1  | hsa-miR-182-3p | -0,01 | -0,26 |
| ACADSB     | ENST00000358776.4  | hsa-miR-182-3p | -0,01 | -0,07 |
| SH3GL2     | ENST00000380607.4  | hsa-miR-182-3p | -0,01 | -0,19 |
| DPM3       | ENST00000368399.1  | hsa-miR-182-3p | -0,01 | -0,31 |
| SF3A1      | ENST00000215793.8  | hsa-miR-182-3p | -0,01 | -0,11 |
| PHKA2      | ENST00000379942.4  | hsa-miR-182-3p | -0,01 | -0,05 |
| SMU1       | ENST00000397149.3  | hsa-miR-182-3p | -0,01 | -0,12 |

|          |                   |                |       |       |
|----------|-------------------|----------------|-------|-------|
| NUDT19   | ENST00000397061.3 | hsa-miR-182-3p | -0,01 | -0,07 |
| APTX     | ENST00000436040.2 | hsa-miR-182-3p | -0,01 | -0,2  |
| CALCRL   | ENST00000392370.3 | hsa-miR-182-3p | -0,01 | -0,15 |
| ARID3A   | ENST00000263620.3 | hsa-miR-182-3p | -0,01 | -0,01 |
| LBP      | ENST00000217407.2 | hsa-miR-182-3p | -0,01 | -0,12 |
| ZNF177   | ENST00000541595.2 | hsa-miR-182-3p | -0,01 | -0,17 |
| INTU     | ENST00000335251.6 | hsa-miR-182-3p | -0,01 | -0,01 |
| ACTR1A   | ENST00000487599.1 | hsa-miR-182-3p | -0,01 | -0,1  |
| VEGFC    | ENST00000280193.2 | hsa-miR-182-3p | -0,01 | -0,09 |
| INTS6    | ENST00000311234.4 | hsa-miR-182-3p | -0,01 | -0,02 |
| DCAF5    | ENST00000341516.5 | hsa-miR-182-3p | -0,01 | -0,06 |
| CEP89    | ENST00000305768.5 | hsa-miR-182-3p | -0,01 | -0,07 |
| CEP97    | ENST00000341893.3 | hsa-miR-182-3p | -0,01 | -0,2  |
| RAD50    | ENST00000378823.3 | hsa-miR-182-3p | -0,01 | -0,03 |
| HEPH     | ENST00000519389.1 | hsa-miR-182-3p | -0,01 | -0,06 |
| GPKOW    | ENST00000156109.5 | hsa-miR-182-3p | -0,01 | -0,18 |
| SLC9A7   | ENST00000328306.4 | hsa-miR-182-3p | -0,01 | -0,01 |
| PAGR1    | ENST00000609618.1 | hsa-miR-182-3p | -0,01 | -0,13 |
| GJC1     | ENST00000426548.1 | hsa-miR-182-3p | -0,01 | -0,03 |
| STXBP5   | ENST00000367481.3 | hsa-miR-182-3p | -0,01 | -0,07 |
| CMTM4    | ENST00000394106.2 | hsa-miR-182-3p | -0,01 | -0,02 |
| HDAC5    | ENST00000225983.6 | hsa-miR-182-3p | -0,01 | -0,03 |
| CEP68    | ENST00000377990.2 | hsa-miR-182-3p | -0,01 | -0,07 |
| NUFIP2   | ENST00000225388.4 | hsa-miR-182-3p | -0,01 | -0,06 |
| CCNT2    | ENST00000295238.6 | hsa-miR-182-3p | -0,01 | -0,15 |
| DDX52    | ENST00000349699.2 | hsa-miR-182-3p | -0,01 | -0,1  |
| DDR1     | ENST00000446312.1 | hsa-miR-182-3p | -0,01 | -0,04 |
| WAC      | ENST00000375664.4 | hsa-miR-182-3p | -0,01 | -0,04 |
| PPP1R9A  | ENST00000289495.5 | hsa-miR-182-3p | -0,01 | -0,01 |
| A1CF     | ENST00000374001.2 | hsa-miR-182-3p | -0,01 | -0,03 |
| TRAPPC13 | ENST00000399438.3 | hsa-miR-182-3p | -0,01 | -0,24 |
| CENPM    | ENST00000404067.1 | hsa-miR-182-3p | -0,01 | -0,18 |
| C1orf27  | ENST00000287859.6 | hsa-miR-182-3p | -0,01 | -0,28 |
| ZFP37    | ENST00000374227.3 | hsa-miR-182-3p | -0,01 | -0,03 |
| ESF1     | ENST00000202816.1 | hsa-miR-182-3p | -0,01 | -0,07 |
| RIMKLA   | ENST00000431473.3 | hsa-miR-182-3p | -0,01 | -0,02 |
| GMPR     | ENST00000259727.4 | hsa-miR-182-3p | -0,01 | -0,13 |
| TTL7     | ENST00000260505.8 | hsa-miR-182-3p | -0,01 | -0,11 |
| ABAT     | ENST00000569156.1 | hsa-miR-182-3p | -0,01 | -0,01 |
| SERTAD4  | ENST00000367012.3 | hsa-miR-182-3p | -0,01 | -0,02 |
| PIAS1    | ENST00000249636.6 | hsa-miR-182-3p | -0,01 | -0,04 |
| ALDH6A1  | ENST00000553458.1 | hsa-miR-182-3p | -0,01 | -0,15 |
| COX15    | ENST00000016171.5 | hsa-miR-182-3p | -0,01 | -0,12 |
| TRAPPC2L | ENST00000565504.1 | hsa-miR-182-3p | -0,01 | -0,03 |
| ZFYVE28  | ENST00000508471.1 | hsa-miR-182-3p | -0,01 | -0,01 |
| TMEM218  | ENST00000532156.1 | hsa-miR-182-3p | -0,01 | -0,41 |
| SLC2A8   | ENST00000373360.3 | hsa-miR-182-3p | -0,01 | -0,11 |
| NBN      | ENST00000265433.3 | hsa-miR-182-3p | -0,01 | -0,07 |
| MED28    | ENST00000237380.7 | hsa-miR-182-3p | -0,01 | -0,22 |
| MED20    | ENST00000409312.1 | hsa-miR-182-3p | -0,01 | -0,21 |
| NCAM1    | ENST00000316851.7 | hsa-miR-182-3p | -0,01 | -0,02 |
| EMC2     | ENST00000220853.3 | hsa-miR-182-3p | -0,01 | -0,53 |
| DNAJC15  | ENST00000379221.2 | hsa-miR-182-3p | -0,01 | -0,32 |
| TNIK     | ENST00000436636.2 | hsa-miR-182-3p | -0,01 | -0,1  |
| TCEAL4   | ENST00000472484.1 | hsa-miR-182-3p | -0,01 | -0,29 |
| SLC41A2  | ENST00000258538.3 | hsa-miR-182-3p | -0,01 | -0,17 |
| ZNF670   | ENST00000366503.2 | hsa-miR-182-3p | -0,01 | -0,26 |
| TRMT10B  | ENST00000297994.3 | hsa-miR-182-3p | -0,01 | -0,13 |
| TMEM98   | ENST00000579849.1 | hsa-miR-182-3p | -0,01 | -0,1  |
| AKT2     | ENST00000392038.2 | hsa-miR-182-3p | -0,01 | -0,02 |
| TMEM180  | ENST00000238936.4 | hsa-miR-182-3p | -0,01 | -0,03 |
| MAGIX    | ENST00000376338.3 | hsa-miR-182-3p | -0,01 | -0,12 |
| NEK10    | ENST00000295720.6 | hsa-miR-182-3p | 0     | -0,1  |
| TRMT5    | ENST00000261249.6 | hsa-miR-182-3p | 0     | -0,07 |
| ABCD4    | ENST00000356924.4 | hsa-miR-182-3p | 0     | -0,14 |
| TIMP3    | ENST00000266085.6 | hsa-miR-182-3p | 0     | -0,04 |

|                 |                   |                |   |       |
|-----------------|-------------------|----------------|---|-------|
| STAMBPL1        | ENST00000371926.3 | hsa-miR-182-3p | 0 | -0,1  |
| SNX24           | ENST00000513881.1 | hsa-miR-182-3p | 0 | -0,1  |
| NEK3            | ENST00000339406.3 | hsa-miR-182-3p | 0 | -0,15 |
| PPP3CC          | ENST00000289963.8 | hsa-miR-182-3p | 0 | -0,12 |
| PELI3           | ENST00000320740.7 | hsa-miR-182-3p | 0 | -0,03 |
| MBD2            | ENST00000256429.3 | hsa-miR-182-3p | 0 | -0,3  |
| DNAL1           | ENST00000553645.2 | hsa-miR-182-3p | 0 | -0,08 |
| CISD3           | ENST00000439660.2 | hsa-miR-182-3p | 0 | -0,1  |
| KAL1            | ENST00000262648.3 | hsa-miR-182-3p | 0 | -0,01 |
| HEXIM2          | ENST00000307275.3 | hsa-miR-182-3p | 0 | -0,18 |
| SLC48A1         | ENST00000442218.2 | hsa-miR-182-3p | 0 | -0,1  |
| ANKHD1-EIF4EBP3 | ENST00000532219.1 | hsa-miR-182-3p | 0 | -0,1  |
| GPRASP2         | ENST00000543253.1 | hsa-miR-182-3p | 0 | -0,19 |
| CDH6            | ENST00000265071.2 | hsa-miR-182-3p | 0 | -0,03 |
| AAK1            | ENST00000409085.4 | hsa-miR-182-3p | 0 | -0,01 |
| SDHAF2          | ENST00000543265.1 | hsa-miR-182-3p | 0 | -0,31 |
| PDPR            | ENST00000568530.1 | hsa-miR-182-3p | 0 | -0,06 |
| FUNDC2          | ENST00000369498.3 | hsa-miR-182-3p | 0 | -0,12 |
| SUSD1           | ENST00000374263.3 | hsa-miR-182-3p | 0 | -0,04 |
| SEMA6A          | ENST00000343348.6 | hsa-miR-182-3p | 0 | -0,05 |
| PDS5A           | ENST00000303538.8 | hsa-miR-182-3p | 0 | -0,08 |
| OBFC1           | ENST00000224950.3 | hsa-miR-182-3p | 0 | -0,06 |
| LEF1            | ENST00000265165.1 | hsa-miR-182-3p | 0 | -0,05 |
| VWDE            | ENST00000275358.3 | hsa-miR-182-3p | 0 | -0,01 |
| PTCHD1          | ENST00000379361.4 | hsa-miR-182-3p | 0 | -0,04 |
| ADAMTS4         | ENST00000367996.5 | hsa-miR-182-3p | 0 | -0,02 |
| NAV1            | ENST00000295624.6 | hsa-miR-182-3p | 0 | -0,01 |
| FZD1            | ENST00000287934.2 | hsa-miR-182-3p | 0 | -0,14 |
| EXO1            | ENST00000518483.1 | hsa-miR-182-3p | 0 | -0,09 |
| SERPINA4        | ENST00000555095.1 | hsa-miR-182-3p | 0 | -0,14 |
| DHRS7B          | ENST00000395511.3 | hsa-miR-182-3p | 0 | -0,06 |
| TMEM39A         | ENST00000319172.5 | hsa-miR-182-3p | 0 | -0,05 |
| SPECC1          | ENST00000395530.2 | hsa-miR-182-3p | 0 | -0,1  |
| EED             | ENST00000327320.4 | hsa-miR-182-3p | 0 | -0,16 |
| COBLL1          | ENST00000375458.2 | hsa-miR-182-3p | 0 | -0,03 |
| UBE2W           | ENST00000517608.1 | hsa-miR-182-3p | 0 | -0,08 |
| RBFA            | ENST00000262197.7 | hsa-miR-182-3p | 0 | -0,1  |
| ZBTB25          | ENST00000608382.1 | hsa-miR-182-3p | 0 | -0,03 |
| MRPS11          | ENST00000325844.4 | hsa-miR-182-3p | 0 | -0,04 |
| SRFBP1          | ENST00000339397.4 | hsa-miR-182-3p | 0 | -0,14 |
| BRIX1           | ENST00000336767.5 | hsa-miR-182-3p | 0 | -0,17 |
| HM13            | ENST00000335574.5 | hsa-miR-182-3p | 0 | -0,13 |
| TUSC2           | ENST00000232496.4 | hsa-miR-182-3p | 0 | -0,16 |
| SLC45A4         | ENST00000519067.1 | hsa-miR-182-3p | 0 | -0,06 |
| GFRA1           | ENST00000439649.3 | hsa-miR-182-3p | 0 | -0,05 |
| FGL2            | ENST00000248598.5 | hsa-miR-182-3p | 0 | -0,15 |
| FNBP1           | ENST00000355681.3 | hsa-miR-182-3p | 0 | -0,02 |
| RFC5            | ENST00000229043.3 | hsa-miR-182-3p | 0 | -0,11 |
| ABCB1           | ENST00000265724.3 | hsa-miR-182-3p | 0 | -0,08 |
| SPHAR           | ENST00000366688.3 | hsa-miR-182-3p | 0 | -0,13 |
| HPX             | ENST00000265983.3 | hsa-miR-182-3p | 0 | -0,06 |
| UBE2N           | ENST00000550657.1 | hsa-miR-182-3p | 0 | -0,21 |
| PLEKHA3         | ENST00000234453.5 | hsa-miR-182-3p | 0 | -0,06 |
| NSL1            | ENST00000422588.2 | hsa-miR-182-3p | 0 | -0,03 |
| KRR1            | ENST00000229214.4 | hsa-miR-182-3p | 0 | -0,02 |
| SUGT1           | ENST00000310528.8 | hsa-miR-182-3p | 0 | -0,02 |
| MAP2K6          | ENST00000590474.1 | hsa-miR-182-3p | 0 | -0,02 |
| WDR5B           | ENST00000330689.4 | hsa-miR-182-3p | 0 | -0,04 |
| UBD             | ENST00000377050.4 | hsa-miR-182-3p | 0 | -0,13 |
| CADM1           | ENST00000452722.3 | hsa-miR-182-3p | 0 | -0,32 |
| RNPEPL1         | ENST00000270357.4 | hsa-miR-182-3p | 0 | -0,17 |
| CLPB            | ENST00000294053.3 | hsa-miR-182-3p | 0 | -0,02 |
| SUMO2           | ENST00000420826.2 | hsa-miR-182-3p | 0 | -0,07 |
| WDR53           | ENST00000332629.5 | hsa-miR-182-3p | 0 | -0,11 |
| ZNF639          | ENST00000326361.3 | hsa-miR-182-3p | 0 | -0,1  |
| ANXA11          | ENST00000372231.3 | hsa-miR-182-3p | 0 | -0,03 |

|             |                   |                |   |       |
|-------------|-------------------|----------------|---|-------|
| GNB1L       | ENST00000329517.6 | hsa-miR-182-3p | 0 | -0,14 |
| DCTN6       | ENST00000221114.3 | hsa-miR-182-3p | 0 | -0,14 |
| CDKN2C      | ENST00000262662.1 | hsa-miR-182-3p | 0 | -0,2  |
| IKZF3       | ENST00000346872.3 | hsa-miR-182-3p | 0 | -0,01 |
| NUP205      | ENST00000285968.6 | hsa-miR-182-3p | 0 | -0,01 |
| PHB2        | ENST00000546111.1 | hsa-miR-182-3p | 0 | -0,12 |
| ZNF71       | ENST00000328070.6 | hsa-miR-182-3p | 0 | -0,03 |
| PAOX        | ENST00000368539.4 | hsa-miR-182-3p | 0 | -0,11 |
| SRSF3       | ENST00000373715.6 | hsa-miR-182-3p | 0 | -0,19 |
| NOTCH1      | ENST00000277541.6 | hsa-miR-182-3p | 0 | -0,01 |
| F10         | ENST00000375551.3 | hsa-miR-182-3p | 0 | -0,05 |
| OXSM        | ENST00000280701.3 | hsa-miR-182-3p | 0 | -0,17 |
| FANCB       | ENST00000324138.3 | hsa-miR-182-3p | 0 | -0,1  |
| MBOAT1      | ENST00000541730.1 | hsa-miR-182-3p | 0 | -0,08 |
| TPBG        | ENST00000369750.3 | hsa-miR-182-3p | 0 | -0,1  |
| SNAP47      | ENST00000366760.1 | hsa-miR-182-3p | 0 | -0,19 |
| TLL5        | ENST00000298832.9 | hsa-miR-182-3p | 0 | -0,34 |
| TTC4        | ENST00000371281.3 | hsa-miR-182-3p | 0 | -0,14 |
| TACO1       | ENST00000258975.6 | hsa-miR-182-3p | 0 | -0,15 |
| TRIM38      | ENST00000357085.3 | hsa-miR-182-3p | 0 | -0,04 |
| COX10       | ENST00000261643.3 | hsa-miR-182-3p | 0 | -0,06 |
| TMEM135     | ENST00000340353.7 | hsa-miR-182-3p | 0 | -0,13 |
| SFXN2       | ENST00000369893.5 | hsa-miR-182-3p | 0 | -0,17 |
| NAGS        | ENST00000293404.3 | hsa-miR-182-3p | 0 | -0,1  |
| KB-1507C5.2 | ENST00000524007.1 | hsa-miR-182-3p | 0 | -0,19 |
| INPP4A      | ENST00000409016.4 | hsa-miR-182-3p | 0 | -0,06 |
| UQCRB       | ENST00000287022.5 | hsa-miR-182-3p | 0 | -0,1  |
| STK25       | ENST00000316586.4 | hsa-miR-182-3p | 0 | -0,1  |
| COMTD1      | ENST00000372538.3 | hsa-miR-182-3p | 0 | -0,17 |
| POLK        | ENST00000241436.4 | hsa-miR-182-3p | 0 | -0,15 |
| ORC4        | ENST00000392857.5 | hsa-miR-182-3p | 0 | -0,29 |
| FAM96A      | ENST00000557835.1 | hsa-miR-182-3p | 0 | -0,15 |
| CSRP2BP     | ENST00000435364.3 | hsa-miR-182-3p | 0 | -0,11 |
| GNB2L1      | ENST00000514455.1 | hsa-miR-182-3p | 0 | -0,46 |
| NDUFB9      | ENST00000276689.3 | hsa-miR-182-3p | 0 | -0,14 |
| ST5         | ENST00000526757.1 | hsa-miR-182-3p | 0 | -0,24 |
| FOXRED2     | ENST00000397224.4 | hsa-miR-182-3p | 0 | -0,1  |
| FAM179A     | ENST00000379558.4 | hsa-miR-182-3p | 0 | -0,01 |
| KCMF1       | ENST00000409785.4 | hsa-miR-182-3p | 0 | -0,21 |
| CGRRF1      | ENST00000216420.7 | hsa-miR-182-3p | 0 | -0,11 |
| CEP128      | ENST00000281129.3 | hsa-miR-182-3p | 0 | -0,18 |
| GRK6        | ENST00000393576.3 | hsa-miR-182-3p | 0 | -0,04 |
| DLK1        | ENST00000341267.4 | hsa-miR-182-3p | 0 | -0,11 |
| AGPS        | ENST00000264167.4 | hsa-miR-182-3p | 0 | -0,25 |
| GAB2        | ENST00000340149.2 | hsa-miR-182-3p | 0 | -0,06 |
| LRIG3       | ENST00000379141.4 | hsa-miR-182-3p | 0 | -0,04 |
| PAPOLA      | ENST00000557471.1 | hsa-miR-182-3p | 0 | -0,26 |
| ITGB5       | ENST00000296181.4 | hsa-miR-182-3p | 0 | -0,17 |
| ZSCAN2      | ENST00000541040.1 | hsa-miR-182-3p | 0 | -0,02 |
| RNF20       | ENST00000389120.3 | hsa-miR-182-3p | 0 | -0,03 |
| MSX2        | ENST00000239243.6 | hsa-miR-182-3p | 0 | -0,11 |
| STX7        | ENST00000367941.2 | hsa-miR-182-3p | 0 | -0,34 |
| C17orf85    | ENST00000158149.3 | hsa-miR-182-3p | 0 | -0,05 |
| GGCX        | ENST00000233838.4 | hsa-miR-182-3p | 0 | -0,11 |
| UROS        | ENST00000368797.4 | hsa-miR-182-3p | 0 | -0,15 |
| TRIM27      | ENST00000377194.3 | hsa-miR-182-3p | 0 | -0,2  |
| UFC1        | ENST00000368003.5 | hsa-miR-182-3p | 0 | -0,23 |
| TNFAIP8     | ENST00000504771.2 | hsa-miR-182-3p | 0 | -0,06 |
| TBC1D19     | ENST00000264866.4 | hsa-miR-182-3p | 0 | -0,03 |
| NFATC4      | ENST00000413692.2 | hsa-miR-182-3p | 0 | -0,03 |
| NGDN        | ENST00000397154.3 | hsa-miR-182-3p | 0 | -0,29 |
| NABP1       | ENST00000410026.2 | hsa-miR-182-3p | 0 | -0,03 |
| PAX6        | ENST00000419022.1 | hsa-miR-182-3p | 0 | -0,07 |
| ARRB1       | ENST00000420843.2 | hsa-miR-182-3p | 0 | -0,01 |
| PFDN4       | ENST00000371419.2 | hsa-miR-182-3p | 0 | -0,16 |
| INTS8       | ENST00000523731.1 | hsa-miR-182-3p | 0 | -0,22 |

|          |                   |                |   |       |
|----------|-------------------|----------------|---|-------|
| MCM5     | ENST00000216122.4 | hsa-miR-182-3p | 0 | -0,08 |
| EFHC1    | ENST00000371068.5 | hsa-miR-182-3p | 0 | -0,01 |
| ZMYM2    | ENST00000382869.3 | hsa-miR-182-3p | 0 | -0,06 |
| TRMT10C  | ENST00000309922.6 | hsa-miR-182-3p | 0 | -0,21 |
| ASTN2    | ENST00000341734.4 | hsa-miR-182-3p | 0 | -0,03 |
| SMC6     | ENST00000448223.2 | hsa-miR-182-3p | 0 | -0,01 |
| NGRN     | ENST00000379095.3 | hsa-miR-182-3p | 0 | -0,1  |
| RPS23    | ENST00000296674.8 | hsa-miR-182-3p | 0 | -0,31 |
| ACP6     | ENST00000369238.6 | hsa-miR-182-3p | 0 | -0,24 |
| MAPK14   | ENST00000229795.3 | hsa-miR-182-3p | 0 | -0,15 |
| RAB3C    | ENST00000282878.4 | hsa-miR-182-3p | 0 | -0,02 |
| TSPAN6   | ENST00000373020.4 | hsa-miR-182-3p | 0 | -0,13 |
| TBC1D15  | ENST00000550746.1 | hsa-miR-182-3p | 0 | -0,1  |
| SCFD2    | ENST00000401642.3 | hsa-miR-182-3p | 0 | -0,15 |
| TIGD6    | ENST00000296736.3 | hsa-miR-182-3p | 0 | -0,09 |
| ERO1LB   | ENST00000354619.5 | hsa-miR-182-3p | 0 | -0,15 |
| SUPT7L   | ENST00000337768.5 | hsa-miR-182-3p | 0 | -0,14 |
| FOCAD    | ENST00000380249.1 | hsa-miR-182-3p | 0 | -0,08 |
| AHSA2    | ENST00000394457.3 | hsa-miR-182-3p | 0 | -0,15 |
| CHRNA5   | ENST00000299565.5 | hsa-miR-182-3p | 0 | -0,3  |
| PSMB7    | ENST00000259457.3 | hsa-miR-182-3p | 0 | -0,16 |
| MKKS     | ENST00000347364.3 | hsa-miR-182-3p | 0 | -0,1  |
| NTPCR    | ENST00000366628.5 | hsa-miR-182-3p | 0 | -0,1  |
| RPL31    | ENST00000409320.3 | hsa-miR-182-3p | 0 | -0,44 |
| FUT4     | ENST00000358752.2 | hsa-miR-182-3p | 0 | -0,06 |
| DCAF10   | ENST00000242323.7 | hsa-miR-182-3p | 0 | -0,07 |
| KLHL5    | ENST00000261425.3 | hsa-miR-182-3p | 0 | -0,14 |
| TUBD1    | ENST00000346141.6 | hsa-miR-182-3p | 0 | -0,15 |
| IKBKAP   | ENST00000374647.5 | hsa-miR-182-3p | 0 | -0,07 |
| MRGPRF   | ENST00000441623.1 | hsa-miR-182-3p | 0 | -0,04 |
| NUPL2    | ENST00000258742.5 | hsa-miR-182-3p | 0 | -0,17 |
| GFM1     | ENST00000486715.1 | hsa-miR-182-3p | 0 | -0,02 |
| PCDHB2   | ENST00000194155.4 | hsa-miR-182-3p | 0 | -0,11 |
| HPS1     | ENST00000361490.4 | hsa-miR-182-3p | 0 | -0,09 |
| CLNS1A   | ENST00000525428.1 | hsa-miR-182-3p | 0 | -0,15 |
| TMEM246  | ENST00000374847.1 | hsa-miR-182-3p | 0 | -0,16 |
| KCTD7    | ENST00000275532.3 | hsa-miR-182-3p | 0 | -0,19 |
| LONP2    | ENST00000285737.4 | hsa-miR-182-3p | 0 | -0,01 |
| POLR2E   | ENST00000215587.7 | hsa-miR-182-3p | 0 | -0,2  |
| CDKN2AIP | ENST00000302350.4 | hsa-miR-182-3p | 0 | -0,15 |
| TPT1     | ENST00000379056.1 | hsa-miR-182-3p | 0 | -0,08 |
| AKT1     | ENST00000554581.1 | hsa-miR-182-3p | 0 | -0,06 |
| RCAN1    | ENST00000482533.1 | hsa-miR-182-3p | 0 | -0,18 |
| SEPHS1   | ENST00000545675.1 | hsa-miR-182-3p | 0 | -0,07 |
| ST3GAL6  | ENST00000265261.6 | hsa-miR-182-3p | 0 | -0,13 |
| PYCR1    | ENST00000329875.8 | hsa-miR-182-3p | 0 | -0,09 |
| ISL2     | ENST00000290759.4 | hsa-miR-182-3p | 0 | -0,01 |
| GTPBP8   | ENST00000383677.3 | hsa-miR-182-3p | 0 | -0,13 |
| LETMD1   | ENST00000380123.2 | hsa-miR-182-3p | 0 | -0,45 |
| VIL1     | ENST00000248444.5 | hsa-miR-182-3p | 0 | -0,09 |
| NSDHL    | ENST00000370274.3 | hsa-miR-182-3p | 0 | -0,17 |
| SMIM4    | ENST00000477703.1 | hsa-miR-182-3p | 0 | -0,76 |
| RBM15B   | ENST00000323686.4 | hsa-miR-182-3p | 0 | -0,03 |
| PRSS23   | ENST00000280258.5 | hsa-miR-182-3p | 0 | -0,19 |
| G6PC3    | ENST00000269097.4 | hsa-miR-182-3p | 0 | -0,21 |
| LIG3     | ENST00000378526.4 | hsa-miR-182-3p | 0 | -0,02 |
| AGPAT6   | ENST00000396987.3 | hsa-miR-182-3p | 0 | -0,02 |
| RAE1     | ENST00000395841.2 | hsa-miR-182-3p | 0 | -0,14 |
| PQLC2    | ENST00000375155.3 | hsa-miR-182-3p | 0 | -0,01 |
| NPC2     | ENST00000541064.1 | hsa-miR-182-3p | 0 | -0,28 |
| TMEM194B | ENST00000409150.3 | hsa-miR-182-3p | 0 | -0,05 |
| C1orf112 | ENST00000359326.4 | hsa-miR-182-3p | 0 | -0,24 |
| MON2     | ENST00000546600.1 | hsa-miR-182-3p | 0 | -0,08 |
| KDM5C    | ENST00000375401.3 | hsa-miR-182-3p | 0 | -0,2  |
| GTF2B    | ENST00000370500.5 | hsa-miR-182-3p | 0 | -0,2  |
| POMT2    | ENST00000261534.4 | hsa-miR-182-3p | 0 | -0,03 |

|          |                   |                |   |       |
|----------|-------------------|----------------|---|-------|
| LIPC     | ENST00000433326.2 | hsa-miR-182-3p | 0 | -0,12 |
| CLCC1    | ENST00000356970.2 | hsa-miR-182-3p | 0 | -0,14 |
| C3orf17  | ENST00000314400.5 | hsa-miR-182-3p | 0 | -0,12 |
| DMXL1    | ENST00000311085.8 | hsa-miR-182-3p | 0 | -0,02 |
| RBP4     | ENST00000371464.3 | hsa-miR-182-3p | 0 | -0,17 |
| VPS18    | ENST00000220509.5 | hsa-miR-182-3p | 0 | -0,02 |
| HINFP    | ENST00000350777.2 | hsa-miR-182-3p | 0 | -0,08 |
| SMARCA5  | ENST00000283131.3 | hsa-miR-182-3p | 0 | -0,1  |
| BRMS1L   | ENST00000216807.7 | hsa-miR-182-3p | 0 | -0,05 |
| GAS7     | ENST00000437099.2 | hsa-miR-182-3p | 0 | -0,01 |
| KIAA1551 | ENST00000312561.4 | hsa-miR-182-3p | 0 | -0,01 |
| CKAP4    | ENST00000378026.4 | hsa-miR-182-3p | 0 | -0,04 |
| TMEM199  | ENST00000292114.3 | hsa-miR-182-3p | 0 | -0,08 |
| G6PC2    | ENST00000421979.1 | hsa-miR-182-3p | 0 | -0,53 |
| PRMT6    | ENST00000370078.1 | hsa-miR-182-3p | 0 | -0,16 |
| PHKG2    | ENST00000563588.1 | hsa-miR-182-3p | 0 | -0,02 |
| GOSR1    | ENST00000225724.5 | hsa-miR-182-3p | 0 | -0,01 |
| FAH      | ENST00000407106.1 | hsa-miR-182-3p | 0 | -0,41 |
| SHB      | ENST00000377707.3 | hsa-miR-182-3p | 0 | -0,02 |
| DSN1     | ENST00000426836.1 | hsa-miR-182-3p | 0 | -0,19 |
| CMC1     | ENST00000466830.1 | hsa-miR-182-3p | 0 | -0,2  |
| POFUT2   | ENST00000349485.5 | hsa-miR-182-3p | 0 | -0,14 |
| CHD9     | ENST00000566029.1 | hsa-miR-182-3p | 0 | -0,07 |
| WEE1     | ENST00000299613.6 | hsa-miR-182-3p | 0 | -0,09 |
| EMC7     | ENST00000256545.4 | hsa-miR-182-3p | 0 | -0,39 |
| PHIP     | ENST00000275034.4 | hsa-miR-182-3p | 0 | -0,11 |
| RPL37A   | ENST00000491306.1 | hsa-miR-182-3p | 0 | -0,31 |
| RBM46    | ENST00000514866.1 | hsa-miR-182-3p | 0 | -0,47 |
| CCDC149  | ENST00000428116.2 | hsa-miR-182-3p | 0 | -0,05 |
| IGSF3    | ENST00000369486.3 | hsa-miR-182-3p | 0 | -0,02 |
| C19orf10 | ENST00000262947.3 | hsa-miR-182-3p | 0 | -0,15 |
| HMGCR    | ENST00000287936.4 | hsa-miR-182-3p | 0 | -0,14 |
| FZD2     | ENST00000315323.3 | hsa-miR-182-3p | 0 | -0,12 |
| ERP44    | ENST00000262455.6 | hsa-miR-182-3p | 0 | -0,06 |
| GHITM    | ENST00000372134.3 | hsa-miR-182-3p | 0 | -0,17 |
| WIPI2    | ENST00000288828.4 | hsa-miR-182-3p | 0 | -0,07 |
| WBP11    | ENST00000261167.2 | hsa-miR-182-3p | 0 | -0,13 |
| VANGL1   | ENST00000355485.2 | hsa-miR-182-3p | 0 | -0,03 |
| RPL10L   | ENST00000298283.3 | hsa-miR-182-3p | 0 | -0,38 |
| PLXNA3   | ENST00000369682.3 | hsa-miR-182-3p | 0 | -0,07 |
| PTGDR    | ENST00000553372.1 | hsa-miR-182-3p | 0 | -0,37 |
| SPCS1    | ENST00000233025.7 | hsa-miR-182-3p | 0 | -0,65 |
| SCO1     | ENST00000255390.5 | hsa-miR-182-3p | 0 | -0,06 |
| LRRC4C   | ENST00000278198.2 | hsa-miR-182-3p | 0 | -0,35 |
| SGIP1    | ENST00000371036.3 | hsa-miR-182-3p | 0 | -0,1  |
| PPIP5K2  | ENST00000321521.9 | hsa-miR-182-3p | 0 | -0,01 |
| ACYP2    | ENST00000303536.4 | hsa-miR-182-3p | 0 | -0,3  |
| CCDC84   | ENST00000334418.1 | hsa-miR-182-3p | 0 | -0,33 |
| TIMMDC1  | ENST00000494664.1 | hsa-miR-182-3p | 0 | -0,18 |
| RAB4A    | ENST00000366690.4 | hsa-miR-182-3p | 0 | -0,05 |
| COLEC10  | ENST00000332843.2 | hsa-miR-182-3p | 0 | -0,36 |
| SLITRK4  | ENST00000381779.4 | hsa-miR-182-3p | 0 | -0,01 |
| EPPK1    | ENST00000525985.1 | hsa-miR-182-3p | 0 | -0,01 |
| PLCG1    | ENST00000244007.3 | hsa-miR-182-3p | 0 | -0,02 |
| MRPL36   | ENST00000505059.2 | hsa-miR-182-3p | 0 | -0,07 |
| AKR1D1   | ENST00000432161.1 | hsa-miR-182-3p | 0 | -0,29 |
| CLEC12B  | ENST00000338896.5 | hsa-miR-182-3p | 0 | -0,25 |
| MED14    | ENST00000324817.1 | hsa-miR-182-3p | 0 | -0,11 |
| CSE1L    | ENST00000262982.2 | hsa-miR-182-3p | 0 | -0,02 |
| CFD      | ENST00000327726.6 | hsa-miR-182-3p | 0 | -0,01 |
| GALNT8   | ENST00000252318.2 | hsa-miR-182-3p | 0 | -0,28 |
| HSPH1    | ENST00000320027.5 | hsa-miR-182-3p | 0 | -0,16 |
| BAG1     | ENST00000472232.3 | hsa-miR-182-3p | 0 | -0,23 |
| POLR3A   | ENST00000372371.3 | hsa-miR-182-3p | 0 | -0,02 |
| S1PR1    | ENST00000305352.6 | hsa-miR-182-3p | 0 | -0,05 |
| ECHDC3   | ENST00000379215.4 | hsa-miR-182-3p | 0 | -0,04 |

|               |                   |                |   |       |
|---------------|-------------------|----------------|---|-------|
| GIMAP6        | ENST00000493969.1 | hsa-miR-182-3p | 0 | -0,3  |
| C12orf73      | ENST00000547975.1 | hsa-miR-182-3p | 0 | -0,19 |
| MGAT4C        | ENST00000604798.1 | hsa-miR-182-3p | 0 | -0,3  |
| SPTY2D1       | ENST00000336349.5 | hsa-miR-182-3p | 0 | -0,02 |
| CHSY1         | ENST00000254190.3 | hsa-miR-182-3p | 0 | -0,02 |
| ABRACL        | ENST00000367660.3 | hsa-miR-182-3p | 0 | -0,06 |
| SIX1          | ENST00000247182.6 | hsa-miR-182-3p | 0 | -0,12 |
| ZBTB14        | ENST00000357006.4 | hsa-miR-182-3p | 0 | -0,02 |
| PPIF          | ENST00000394579.3 | hsa-miR-182-3p | 0 | -0,15 |
| NCKAP1        | ENST00000361354.4 | hsa-miR-182-3p | 0 | -0,06 |
| EVI2B         | ENST00000330927.4 | hsa-miR-182-3p | 0 | -0,24 |
| MOBP          | ENST00000420739.1 | hsa-miR-182-3p | 0 | -0,21 |
| PLGLB1        | ENST00000355705.3 | hsa-miR-182-3p | 0 | -0,21 |
| FAM19A1       | ENST00000478136.1 | hsa-miR-182-3p | 0 | -0,2  |
| ISY1          | ENST00000393292.3 | hsa-miR-182-3p | 0 | -0,06 |
| CAPN7         | ENST00000253693.2 | hsa-miR-182-3p | 0 | -0,02 |
| PLGLB2        | ENST00000359481.4 | hsa-miR-182-3p | 0 | -0,21 |
| PIGP          | ENST00000360525.4 | hsa-miR-182-3p | 0 | -0,12 |
| TMEM115       | ENST00000266025.3 | hsa-miR-182-3p | 0 | -0,26 |
| RBM18         | ENST00000417201.3 | hsa-miR-182-3p | 0 | -0,07 |
| WDR77         | ENST00000235090.5 | hsa-miR-182-3p | 0 | -0,07 |
| SIPA1         | ENST00000534313.1 | hsa-miR-182-3p | 0 | -0,02 |
| ECHDC2        | ENST00000371522.4 | hsa-miR-182-3p | 0 | -0,03 |
| ENPP6         | ENST00000296741.2 | hsa-miR-182-3p | 0 | -0,19 |
| GPR22         | ENST00000304402.4 | hsa-miR-182-3p | 0 | -0,2  |
| ACKR2         | ENST00000442925.1 | hsa-miR-182-3p | 0 | -0,24 |
| RBM25         | ENST00000261973.7 | hsa-miR-182-3p | 0 | -0,08 |
| CDR1          | ENST00000370532.2 | hsa-miR-182-3p | 0 | -0,22 |
| DCUN1D5       | ENST00000260247.5 | hsa-miR-182-3p | 0 | -0,12 |
| SMIM17        | ENST00000598409.1 | hsa-miR-182-3p | 0 | -0,23 |
| QDPR          | ENST00000508623.1 | hsa-miR-182-3p | 0 | -0,1  |
| LRRTM3        | ENST00000361320.4 | hsa-miR-182-3p | 0 | -0,23 |
| PFN4          | ENST00000313213.4 | hsa-miR-182-3p | 0 | -0,3  |
| TSC22D2       | ENST00000361875.3 | hsa-miR-182-3p | 0 | -0,1  |
| C10orf71      | ENST00000323868.4 | hsa-miR-182-3p | 0 | -0,2  |
| RP11-210M15.2 | ENST00000559008.1 | hsa-miR-182-3p | 0 | -0,15 |
| VCAN          | ENST00000265077.3 | hsa-miR-182-3p | 0 | -0,1  |
| TP53TG5       | ENST00000372726.3 | hsa-miR-182-3p | 0 | -0,18 |
| CABP4         | ENST00000438189.2 | hsa-miR-182-3p | 0 | -0,15 |
| AGPAT3        | ENST00000291572.8 | hsa-miR-182-3p | 0 | -0,36 |
| CTC1          | ENST00000315684.8 | hsa-miR-182-3p | 0 | -0,04 |
| IL9R          | ENST00000424344.3 | hsa-miR-182-3p | 0 | -0,15 |
| MAL           | ENST00000309988.4 | hsa-miR-182-3p | 0 | -0,18 |
| XPNPEP2       | ENST00000371106.3 | hsa-miR-182-3p | 0 | -0,14 |
| XRCC5         | ENST00000392133.3 | hsa-miR-182-3p | 0 | -0,19 |
| TGIF2LX       | ENST00000283891.5 | hsa-miR-182-3p | 0 | -0,16 |
| GRIN2A        | ENST00000562109.1 | hsa-miR-182-3p | 0 | -0,18 |
| OMD           | ENST00000375550.4 | hsa-miR-182-3p | 0 | -0,13 |
| FHL5          | ENST00000541107.1 | hsa-miR-182-3p | 0 | -0,15 |
| ZNF843        | ENST00000315678.5 | hsa-miR-182-3p | 0 | -0,14 |
| CUL3          | ENST00000264414.4 | hsa-miR-182-3p | 0 | -0,03 |
| BCKDK         | ENST00000394950.3 | hsa-miR-182-3p | 0 | -0,13 |
| MAPK1         | ENST00000215832.6 | hsa-miR-182-3p | 0 | -0,04 |
| CLEC4C        | ENST00000542353.1 | hsa-miR-182-3p | 0 | -0,14 |
| NAALAD2       | ENST00000534061.1 | hsa-miR-182-3p | 0 | -0,15 |
| F5            | ENST00000367797.3 | hsa-miR-182-3p | 0 | -0,17 |
| CHRD1         | ENST00000372045.1 | hsa-miR-182-3p | 0 | -0,15 |
| KNCN          | ENST00000481882.2 | hsa-miR-182-3p | 0 | -0,15 |
| GLYAT         | ENST00000344743.3 | hsa-miR-182-3p | 0 | -0,18 |
| CRISP1        | ENST00000335847.4 | hsa-miR-182-3p | 0 | -0,15 |
| F2            | ENST00000311907.5 | hsa-miR-182-3p | 0 | -0,17 |
| IGSF10        | ENST00000282466.3 | hsa-miR-182-3p | 0 | -0,01 |
| SLC29A3       | ENST00000373189.5 | hsa-miR-182-3p | 0 | -0,02 |
| INHBC         | ENST00000309668.2 | hsa-miR-182-3p | 0 | -0,09 |
| CHRND         | ENST00000258385.3 | hsa-miR-182-3p | 0 | -0,1  |
| ABI2          | ENST00000295851.5 | hsa-miR-182-3p | 0 | -0,04 |



|          |                    |                |   |       |
|----------|--------------------|----------------|---|-------|
| CDC42EP1 | ENST00000249014.4  | hsa-miR-182-3p | 0 | -0,14 |
| SVOP     | ENST00000299134.5  | hsa-miR-182-3p | 0 | -0,15 |
| CYSLTR1  | ENST00000373304.3  | hsa-miR-182-3p | 0 | -0,09 |
| MGAT1    | ENST00000333055.3  | hsa-miR-182-3p | 0 | -0,01 |
| NLRP9    | ENST00000332836.2  | hsa-miR-182-3p | 0 | -0,11 |
| PPIL1    | ENST00000373699.5  | hsa-miR-182-3p | 0 | -0,1  |
| POU2F2   | ENST00000342301.4  | hsa-miR-182-3p | 0 | -0,11 |
| SMC1A    | ENST00000322213.4  | hsa-miR-182-3p | 0 | -0,02 |
| RGPD8    | ENST00000302558.3  | hsa-miR-182-3p | 0 | -0,08 |
| RGPD5    | ENST00000016946.3  | hsa-miR-182-3p | 0 | -0,08 |
| FAM162B  | ENST00000368557.4  | hsa-miR-182-3p | 0 | -0,22 |
| CRIP1    | ENST00000238892.3  | hsa-miR-182-3p | 0 | -0,09 |
| ASAH2B   | ENST00000374007.1  | hsa-miR-182-3p | 0 | -0,11 |
| BTN3A2   | ENST00000396948.1  | hsa-miR-182-3p | 0 | -0,12 |
| AKR7A2   | ENST00000235835.3  | hsa-miR-182-3p | 0 | -0,03 |
| POTED    | ENST00000299443.5  | hsa-miR-182-3p | 0 | -0,11 |
| GLUL     | ENST00000331872.6  | hsa-miR-182-3p | 0 | -0,03 |
| ANGPTL1  | ENST00000234816.2  | hsa-miR-182-3p | 0 | -0,13 |
| METTL24  | ENST00000338882.4  | hsa-miR-182-3p | 0 | -0,13 |
| PCDH11X  | ENST00000504220.2  | hsa-miR-182-3p | 0 | -0,13 |
| LAIR1    | ENST00000391743.3  | hsa-miR-182-3p | 0 | -0,08 |
| RBCK1    | ENST00000356286.5  | hsa-miR-182-3p | 0 | -0,13 |
| RNF213   | ENST00000582970.1  | hsa-miR-182-3p | 0 | -0,03 |
| SLC25A4  | ENST00000281456.6  | hsa-miR-182-3p | 0 | -0,04 |
| DOCK7    | ENST00000251157.5  | hsa-miR-182-3p | 0 | -0,02 |
| MRPL11   | ENST00000329819.4  | hsa-miR-182-3p | 0 | -0,09 |
| COL19A1  | ENST00000322773.4  | hsa-miR-182-3p | 0 | -0,09 |
| NBPF24   | ENST00000369226.3  | hsa-miR-182-3p | 0 | -0,1  |
| CAPZA2   | ENST00000361183.3  | hsa-miR-182-3p | 0 | -0,09 |
| NUP88    | ENST00000573584.1  | hsa-miR-182-3p | 0 | -0,06 |
| TRMU     | ENST00000381019.3  | hsa-miR-182-3p | 0 | -0,01 |
| GTF3C2   | ENST00000359541.2  | hsa-miR-182-3p | 0 | -0,21 |
| DNAJC10  | ENST00000264065.7  | hsa-miR-182-3p | 0 | -0,02 |
| RGPD6    | ENST00000329516.3  | hsa-miR-182-3p | 0 | -0,08 |
| ADORA3   | ENST00000369716.4  | hsa-miR-182-3p | 0 | -0,12 |
| TGFBI    | ENST00000442011.2  | hsa-miR-182-3p | 0 | -0,06 |
| MTO1     | ENST00000498286.1  | hsa-miR-182-3p | 0 | -0,01 |
| ACSM2B   | ENST00000329697.6  | hsa-miR-182-3p | 0 | -0,21 |
| G6PC     | ENST00000253801.2  | hsa-miR-182-3p | 0 | -0,06 |
| EBF4     | ENST00000380648.4  | hsa-miR-182-3p | 0 | -0,05 |
| ABCB11   | ENST00000263817.6  | hsa-miR-182-3p | 0 | -0,07 |
| SOD2     | ENST00000538183.2  | hsa-miR-182-3p | 0 | -0,01 |
| TSHR     | ENST00000541158.2  | hsa-miR-182-3p | 0 | -0,05 |
| CYP2C8   | ENST00000371270.3  | hsa-miR-182-3p | 0 | -0,14 |
| ZBTB20   | ENST00000462705.1  | hsa-miR-182-3p | 0 | -0,07 |
| CDH18    | ENST00000382275.1  | hsa-miR-182-3p | 0 | -0,07 |
| YAE1D1   | ENST00000223273.2  | hsa-miR-182-3p | 0 | -0,37 |
| APRT     | ENST00000426324.2  | hsa-miR-182-3p | 0 | -0,19 |
| FNDC5    | ENST00000496770.1  | hsa-miR-182-3p | 0 | -0,05 |
| ANKRD32  | ENST00000265140.5  | hsa-miR-182-3p | 0 | -0,02 |
| KY       | ENST00000508956.1  | hsa-miR-182-3p | 0 | -0,06 |
| TG       | ENST00000519543.1  | hsa-miR-182-3p | 0 | -0,04 |
| ENPP5    | ENST00000371383.2  | hsa-miR-182-3p | 0 | -0,11 |
| PAM      | ENST00000438793.3  | hsa-miR-182-3p | 0 | -0,21 |
| SLC19A1  | ENST00000311124.4  | hsa-miR-182-3p | 0 | -0,04 |
| ACSM2A   | ENST00000573854.1  | hsa-miR-182-3p | 0 | -0,29 |
| BMP10    | ENST00000295379.1  | hsa-miR-182-3p | 0 | -0,03 |
| KRBA1    | ENST00000255992.10 | hsa-miR-182-3p | 0 | -0,02 |
| ATP5G3   | ENST00000284727.4  | hsa-miR-182-3p | 0 | -0,36 |
| CD1D     | ENST00000368171.3  | hsa-miR-182-3p | 0 | -0,09 |
| PFKM     | ENST00000312352.7  | hsa-miR-182-3p | 0 | -0,02 |
| SHMT1    | ENST00000316694.3  | hsa-miR-182-3p | 0 | -0,2  |
| HSPA14   | ENST00000378372.3  | hsa-miR-182-3p | 0 | -0,07 |
| BSND     | ENST00000371265.4  | hsa-miR-182-3p | 0 | -0,03 |
| EPS8     | ENST00000543523.1  | hsa-miR-182-3p | 0 | -0,03 |
| HLA-DRB1 | ENST00000360004.5  | hsa-miR-182-3p | 0 | -0,4  |

|              |                   |                |   |       |
|--------------|-------------------|----------------|---|-------|
| KIAA1468     | ENST00000398130.2 | hsa-miR-182-3p | 0 | -0,03 |
| UGT2B4       | ENST00000305107.6 | hsa-miR-182-3p | 0 | -0,07 |
| NSMCE1       | ENST00000361439.4 | hsa-miR-182-3p | 0 | -0,01 |
| NUDCD3       | ENST00000355451.7 | hsa-miR-182-3p | 0 | -0,01 |
| CCS          | ENST00000533244.1 | hsa-miR-182-3p | 0 | -0,05 |
| KDM3A        | ENST00000409556.1 | hsa-miR-182-3p | 0 | -0,07 |
| LSM10        | ENST00000315732.2 | hsa-miR-182-3p | 0 | -0,02 |
| ASTN1        | ENST00000361833.2 | hsa-miR-182-3p | 0 | -0,09 |
| TRDN         | ENST00000398178.3 | hsa-miR-182-3p | 0 | -0,06 |
| APOBEC3F     | ENST00000308521.5 | hsa-miR-182-3p | 0 | -0,07 |
| ADCYAP1R1    | ENST00000304166.4 | hsa-miR-182-3p | 0 | -0,14 |
| GPR174       | ENST00000276077.1 | hsa-miR-182-3p | 0 | -0,05 |
| SLFN12L      | ENST00000260908.7 | hsa-miR-182-3p | 0 | -0,04 |
| FAM20A       | ENST00000592554.1 | hsa-miR-182-3p | 0 | -0,2  |
| PLSCR1       | ENST00000342435.4 | hsa-miR-182-3p | 0 | -0,07 |
| ETV4         | ENST00000319349.5 | hsa-miR-182-3p | 0 | 0     |
| LRRC40       | ENST00000370952.3 | hsa-miR-182-3p | 0 | -0,18 |
| ACOT2        | ENST00000538782.1 | hsa-miR-182-3p | 0 | -0,01 |
| MFSD2A       | ENST00000372811.5 | hsa-miR-182-3p | 0 | -0,1  |
| BTN3A1       | ENST00000425234.2 | hsa-miR-182-3p | 0 | -0,03 |
| FAM208A      | ENST00000493960.2 | hsa-miR-182-3p | 0 | -0,16 |
| LIPG         | ENST00000261292.4 | hsa-miR-182-3p | 0 | -0,11 |
| SAP30        | ENST00000296504.3 | hsa-miR-182-3p | 0 | -0,18 |
| SEC23IP      | ENST00000369075.3 | hsa-miR-182-3p | 0 | -0,02 |
| RNF103-CHMP3 | ENST00000604011.1 | hsa-miR-182-3p | 0 | -0,11 |
| SF1          | ENST00000377390.3 | hsa-miR-182-3p | 0 | -0,08 |
| CCR7         | ENST00000246657.2 | hsa-miR-182-3p | 0 | -0,01 |
| ZNF277       | ENST00000361822.3 | hsa-miR-182-3p | 0 | -0,11 |
| GPR26        | ENST00000284674.1 | hsa-miR-182-3p | 0 | -0,01 |
| SPATS2L      | ENST00000358677.5 | hsa-miR-182-3p | 0 | -0,07 |
| SSTR2        | ENST00000315332.2 | hsa-miR-182-3p | 0 | -0,1  |
| FRRS1        | ENST00000287474.5 | hsa-miR-182-3p | 0 | -0,11 |
| ZNF512       | ENST00000355467.4 | hsa-miR-182-3p | 0 | 0     |
| SHC3         | ENST00000375835.4 | hsa-miR-182-3p | 0 | -0,07 |
| CYB5A        | ENST00000299438.9 | hsa-miR-182-3p | 0 | -0,34 |
| ALDOA        | ENST00000569798.1 | hsa-miR-182-3p | 0 | -0,05 |
| IDS          | ENST00000422081.2 | hsa-miR-182-3p | 0 | -0,06 |
| RPS24        | ENST00000435275.1 | hsa-miR-182-3p | 0 | -0,13 |
| ZNF562       | ENST00000293648.4 | hsa-miR-182-3p | 0 | -0,09 |
| MYO10        | ENST00000513610.1 | hsa-miR-182-3p | 0 | -0,04 |
| SMAD6        | ENST00000288840.5 | hsa-miR-182-3p | 0 | -0,07 |
| BCL2L13      | ENST00000418951.2 | hsa-miR-182-3p | 0 | 0     |
| CHRNA4       | ENST00000370263.4 | hsa-miR-182-3p | 0 | -0,02 |
| KAT7         | ENST00000259021.4 | hsa-miR-182-3p | 0 | -0,04 |
| PPAP2B       | ENST00000371250.3 | hsa-miR-182-3p | 0 | -0,08 |
| ARL5A        | ENST00000295087.8 | hsa-miR-182-3p | 0 | -0,1  |
| DDRGK1       | ENST00000354488.3 | hsa-miR-182-3p | 0 | -0,26 |
| SYAP1        | ENST00000380155.3 | hsa-miR-182-3p | 0 | -0,1  |
| ARHGAP29     | ENST00000260526.6 | hsa-miR-182-3p | 0 | 0     |
| RSL1D1       | ENST00000571133.1 | hsa-miR-182-3p | 0 | 0     |
| ZNF141       | ENST00000240499.7 | hsa-miR-182-3p | 0 | -0,09 |
| CRISPLD2     | ENST00000262424.5 | hsa-miR-182-3p | 0 | -0,02 |
| EMC3         | ENST00000245046.2 | hsa-miR-182-3p | 0 | -0,1  |
| SFMBT1       | ENST00000394752.3 | hsa-miR-182-3p | 0 | -0,06 |
| WDR75        | ENST00000314761.4 | hsa-miR-182-3p | 0 | -0,17 |
| SOCS5        | ENST00000306503.5 | hsa-miR-182-3p | 0 | -0,06 |
| PLCL1        | ENST00000428675.1 | hsa-miR-182-3p | 0 | -0,02 |
| TCF3         | ENST00000262965.5 | hsa-miR-182-3p | 0 | -0,01 |
| CARD16       | ENST00000375704.3 | hsa-miR-182-3p | 0 | -0,59 |
| CCNB1        | ENST00000256442.5 | hsa-miR-182-3p | 0 | -0,2  |
| WT1          | ENST00000379079.2 | hsa-miR-182-3p | 0 | -0,11 |
| CD3D         | ENST00000300692.4 | hsa-miR-182-3p | 0 | -0,03 |
| ANGPTL3      | ENST00000371129.3 | hsa-miR-182-3p | 0 | -0,05 |
| MAG          | ENST00000392213.3 | hsa-miR-182-3p | 0 | -0,01 |
| PHC1         | ENST00000433083.2 | hsa-miR-182-3p | 0 | 0     |
| CACNA1B      | ENST00000277551.2 | hsa-miR-182-3p | 0 | -0,01 |

|          |                   |                |   |       |
|----------|-------------------|----------------|---|-------|
| EHD3     | ENST00000322054.5 | hsa-miR-182-3p | 0 | -0,01 |
| THBS1    | ENST00000260356.5 | hsa-miR-182-3p | 0 | 0     |
| ZNF713   | ENST00000429591.2 | hsa-miR-182-3p | 0 | 0     |
| PON1     | ENST00000222381.3 | hsa-miR-182-3p | 0 | -0,17 |
| LIMK2    | ENST00000331728.4 | hsa-miR-182-3p | 0 | -0,02 |
| XBP1     | ENST00000344347.5 | hsa-miR-182-3p | 0 | -0,12 |
| ALS2CR11 | ENST00000439802.1 | hsa-miR-182-3p | 0 | -0,54 |
| CDC73    | ENST00000367435.3 | hsa-miR-182-3p | 0 | -0,03 |
| UBC      | ENST00000536769.1 | hsa-miR-182-3p | 0 | -0,05 |
| CEP85    | ENST00000252992.4 | hsa-miR-182-3p | 0 | -0,18 |
| SEMA4F   | ENST00000357877.2 | hsa-miR-182-3p | 0 | -0,14 |
| DNAH17   | ENST00000585328.1 | hsa-miR-182-3p | 0 | -0,01 |
| PLA2G12A | ENST00000243501.5 | hsa-miR-182-3p | 0 | -0,03 |
| CARD11   | ENST00000396946.4 | hsa-miR-182-3p | 0 | -0,05 |
| ESR2     | ENST00000557772.1 | hsa-miR-182-3p | 0 | 0     |
| CCNO     | ENST00000282572.4 | hsa-miR-182-3p | 0 | -0,19 |
| NDNF     | ENST00000379692.4 | hsa-miR-182-3p | 0 | -0,21 |
| CACUL1   | ENST00000369151.3 | hsa-miR-182-3p | 0 | -0,16 |
| SHISA4   | ENST00000362011.6 | hsa-miR-182-3p | 0 | -0,16 |
| GPR183   | ENST00000376414.4 | hsa-miR-182-3p | 0 | -0,15 |
| PRDX2    | ENST00000301522.2 | hsa-miR-182-3p | 0 | -0,13 |
| ZFAND5   | ENST00000237937.3 | hsa-miR-182-3p | 0 | -0,16 |
| SERPINC1 | ENST00000367698.3 | hsa-miR-182-3p | 0 | -0,17 |
| SLC2A9   | ENST00000264784.3 | hsa-miR-182-3p | 0 | 0     |
| ELK1     | ENST00000247161.3 | hsa-miR-182-3p | 0 | -0,03 |
| FAM53A   | ENST00000489363.1 | hsa-miR-182-3p | 0 | -0,06 |
| SYTL4    | ENST00000372989.1 | hsa-miR-182-3p | 0 | -0,15 |
| ABHD15   | ENST00000307201.4 | hsa-miR-182-3p | 0 | -0,12 |
| STRADA   | ENST00000375840.4 | hsa-miR-182-3p | 0 | -0,1  |
| IGF2R    | ENST00000356956.1 | hsa-miR-182-3p | 0 | -0,01 |
| SF3B1    | ENST00000335508.6 | hsa-miR-182-3p | 0 | -0,02 |
| SMTNL2   | ENST00000338859.4 | hsa-miR-182-3p | 0 | -0,01 |
| CHMP3    | ENST00000263856.4 | hsa-miR-182-3p | 0 | -0,12 |
| VWA1     | ENST00000338660.5 | hsa-miR-182-3p | 0 | -0,14 |
| UBE2D3   | ENST00000453744.2 | hsa-miR-182-3p | 0 | -0,26 |
| SLC16A3  | ENST00000581287.1 | hsa-miR-182-3p | 0 | -0,01 |
